# Supplementary material for: Copper-catalyzed cyclization of 2-cyanobenzaldehydes and 2-isocyanoacetates: an efficient strategy for the synthesis of substituted 1-aminoisoquinolines
Source: Royal Society of Chemistry journal article supplement (doi:10.1039/c8cc04733b), 2018-01-01

## Supporting Information

### Copper-Catalyzed Cyclization of 2-Cyanobenzaldehydes and 2-Isocyanoacetates: an Efficient Strategy for the Synthesis of Substituted 1-Aminoisoquinolines

Wen Bao,<sup>a</sup> Jun-Qi Wang,<sup>a</sup> Xue-Tao Xu,<sup>b</sup> Bang-Hong Zhang,<sup>a</sup> Wei-Ting Liu,<sup>a</sup> Lin-Sheng Lei,<sup>a</sup> Huan Liang,<sup>a</sup> Kun Zhang,<sup>b</sup>  
Shao-Hua Wang<sup>\*abc</sup>

<sup>a</sup>School of Pharmacy and State Key Laboratory of Applied Organic Chemistry, Lanzhou University, Lanzhou 730000, P. R. China;

<sup>b</sup>School of Chemical and Environmental Engineering, Wuyi University, Jiangmen 529020, P. R. China; <sup>c</sup>Collaborative Innovation

Center of Chemical Science and Engineering, Tianjin, P. R. China;

Email: wangshh@lzu.edu.cn

## Content

|                                                                        |         |
|------------------------------------------------------------------------|---------|
| 1. General information.....                                            | S2      |
| 2. General experimental procedures.....                                | S2-S3   |
| 3. Characterization of substrates and products.....                    | S3-S11  |
| 4. X-Ray ellipsoid plots of <b>3a</b> .....                            | S12     |
| 5. References.....                                                     | S12     |
| 6 <sup>1</sup> H NMR and <sup>13</sup> C NMR spectra for products..... | S13-S78 |

## 1. General Information

All reactions under standard conditions were carried out under dry atmosphere and monitored by thin-layer chromatography (TLC) on gel F254 plates. All products were purified through silica gel chromatography (200~300 mesh). Column chromatography was carried out with light petroleum ether (b.p. 60~90 °C), ethyl acetate and dichloromethane as eluent.  $^1\text{H}$  and  $^{13}\text{C}$  spectra were recorded in  $\text{CDCl}_3$  or DMSO on 400 MHz or 600 MHz instruments. Chemical shifts ( $\delta$ ) are reported in ppm, and coupling constants (J) are in hertz (Hz). High-resolution mass spectral analysis (HRMS) data were measured on the Apex II by means of the ESI technique. Melting point was measured with SGW-X4B instrument. Unless specified, general procedure C was carried out in a reaction seal tube. All the chemicals were used as obtained from vendors. The substrates 2-formylbenzonitrile (**1a**), 2-acetylbenzonitrile (**1t**), ethyl isocyanoacetate (**2a**), methyl isocyanoacetate (**2b**) and *tert*-Butyl isocyanoacetate (**2c**) are commercially available.

## 2. General experimental procedure

### 2.1 General procedure for the synthesis of 2-formylbenzonitriles 1b-1n

Substrates **1** were prepared according to the procedure reported in literature.

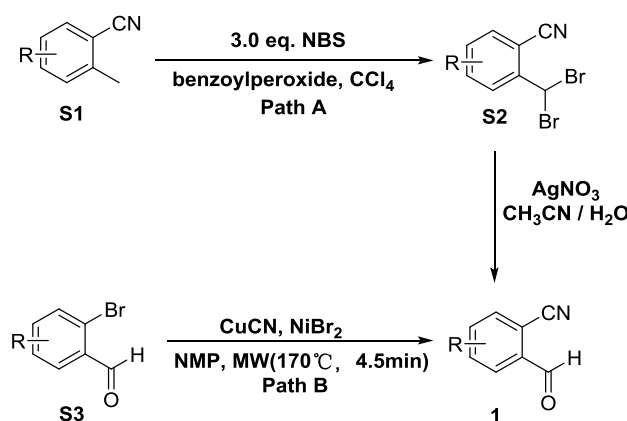

#### General Procedure A: using the preparation of 4-chloro-2-formylbenzonitrile (**1b**) from 4-chloro-2-methylbenzonitrile as an example<sup>1</sup>

To a solution of 4-chloro-2-methylbenzonitrile (1.00 g, 6.60 mmol) in  $\text{CCl}_4$  (10 mL) was added NBS (3.52 g, 3.0 equiv) and BPO (159 mg, 0.1 equiv) successively. The reaction mixture was subsequently stirred for 24 h at  $85^\circ\text{C}$  and monitored by TLC. The reaction was cooled and the precipitate of succinimide and unreacted NBS was removed by filtration and washed with EtOAc. The solvent was evaporated and the residue was purified by column chromatography on silica gel (petroleum ether : EtOAc=100:1 to 20:1) to give 4-chloro-2-(dibromomethyl)benzonitrile as a white solid (1.76 g, 86%).

To a solution of 4-chloro-2-(dibromomethyl)benzonitrile (1.76 g, 5.70 mmol) in acetonitrile (15 mL) was added a solution of  $\text{AgNO}_3$  (2.90 g, 3.0 equiv) in water (3 mL), and the mixture was heated for 20 min under reflux. After the solution was allowed to cool,  $\text{AgBr}$  was filtered off and washed with  $\text{CH}_2\text{Cl}_2$  (3×30 mL), the combined filtrate was washed with water (20 mL) and dried over  $\text{Na}_2\text{SO}_4$ . The solvent was evaporated and the residue was purified by column chromatography on silica gel (petroleum ether : EtOAc=20:1 to 4:1) to afford 4-chloro-2-formylbenzonitrile (**1b**) as a white solid (0.78 g, 83%).

## General Procedure B: using the preparation of 2-formyl-5-methylbenzonitrile (**1g**) from 2-bromo-4-methylbenzaldehyde as an example<sup>2</sup>

2-bromo-4-methylbenzaldehyde (1.00 g, 5.0 mmol), CuCN (2.25 g, 5.0 equiv) and NiBr<sub>2</sub> (384mg, 0.35 equiv) were dissolved in 10 mL NMP. The reaction mixture was irradiated in a microwave oven for 4.5 min (T = 170 °C, pmax = 17 bar, 200 W). Next, the reaction mixture was poured into H<sub>2</sub>O (10 mL) and extracted with CH<sub>2</sub>Cl<sub>2</sub> (3 × 60 mL). The combined organic phases were dried over MgSO<sub>4</sub>, evaporated in vacuo, and the residue was purified by flash chromatography on silica gel (petroleum ether:EtOAc=10:1 to 4:1) to give 2-formyl-5-methylbenzonitrile (**1g**) as a white solid (0.53 g, 73%).

## 2.2 General experimental procedure C for products 3a-3t.

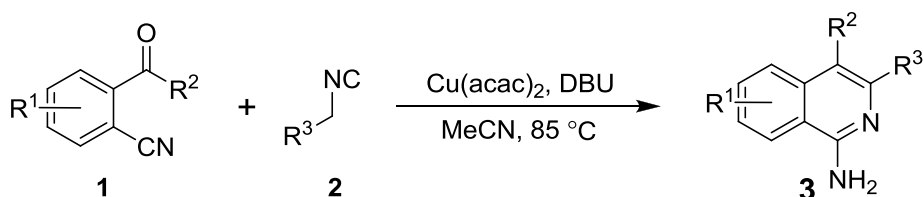

## Using the preparation of ethyl 1-aminoisoquinoline-3-carboxylate from 2-formylbenzonitrile and 2-isocyanoacetate as an example

To a reaction seal tube were added 2-formylbenzonitrile **1a** (100 mg, 0.76 mmol) in CH<sub>3</sub>CN (2.0 mL), Cu(acac)<sub>2</sub> (40 mg, 0.2 equiv), 2-isocyanoacetate **2a** (100 μL, 1.2 equiv), and DBU (137 μL, 1.2equiv). The mixture was stirred at 85 °C for 12 hours. After completion of reaction as indicated by TLC, the mixture was concentrated *in vacuo*, and the residue was purified by flash column chromatograph (petroleum ether : EtOAc=4:1 to 1:1) to give the desired product **3a**.

## 3. Characterization of substrates and products.

### 3.1 Characterization of substrates 1b-1n.

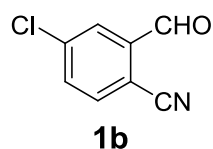

#### 4-chloro-2-formylbenzonitrile (**1b**):

<sup>1</sup>H NMR (400 MHz, CDCl<sub>3</sub>) δ 10.31 (s, 1H), 8.01 (d, *J* = 2.4 Hz, 1H), 7.78 (d, *J* = 8.0 Hz, 1H), 7.73-7.70 (m, 1H); <sup>13</sup>C NMR (100 MHz, CDCl<sub>3</sub>) δ 187.16, 140.46, 137.96, 135.04, 134.35, 129.54, 115.16, 112.08.

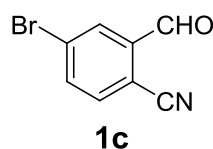

#### 4-bromo-2-formylbenzonitrile (**1c**):

<sup>1</sup>H NMR (400 MHz, CDCl<sub>3</sub>) δ 10.28 (s, 1H), 8.16 (d, *J* = 2.0 Hz, 1H), 7.90-7.87 (m, 1H), 7.70 (d, *J* = 8.0 Hz, 1H); <sup>13</sup>C NMR (100 MHz, CDCl<sub>3</sub>) δ 187.10, 137.80, 137.30, 135.00, 132.56, 128.69, 115.27, 112.52.

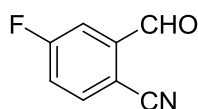

**1d**

**4-fluoro-2-formylbenzonitrile (1d):**

$^1\text{H NMR}$  (400 MHz,  $\text{CDCl}_3$ )  $\delta$  10.31 (d,  $J = 2.4$  Hz, 1H), 7.88-7.85 (m, 1H), 7.73-7.70 (m, 1H), 7.47-7.43 (m, 1H);  $^{13}\text{C NMR}$  (150 MHz,  $\text{CDCl}_3$ )  $\delta$  187.06, 164.90 (d,  $J = 258.3$  Hz), 139.45 (d,  $J = 7.5$  Hz), 136.37 (d,  $J = 8.8$  Hz), 121.67 (d,  $J = 22.8$  Hz), 116.33 (d,  $J = 23.6$  Hz), 115.03, 109.82 (d,  $J = 3.4$  Hz).

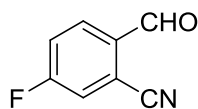

**1e**

**5-fluoro-2-formylbenzonitrile (1e):**

$^1\text{H NMR}$  (600 MHz,  $\text{CDCl}_3$ )  $\delta$  10.26 (s, 1H), 8.09-8.07 (m, 1H), 7.53-7.51 (m, 1H), 7.50-7.47 (m, 1H);  $^{13}\text{C NMR}$  (150 MHz,  $\text{CDCl}_3$ )  $\delta$  186.81, 165.19 (d,  $J = 259.0$  Hz), 133.52, 132.30 (d,  $J = 9.4$  Hz), 121.16 (d,  $J = 25.8$  Hz), 120.94 (d,  $J = 21.0$  Hz), 115.96 (d,  $J = 10.4$  Hz), 114.60.

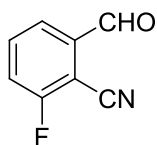

**1f**

**2-fluoro-6-formylbenzonitrile (1f):**

$^1\text{H NMR}$  (400 MHz,  $\text{CDCl}_3$ )  $\delta$  10.23 (s, 1H), 7.86-7.80 (m, 2H), 7.55-7.50 (m, 1H);  $^{13}\text{C NMR}$  (100 MHz,  $\text{CDCl}_3$ )  $\delta$  187.36 (d,  $J = 3.0$  Hz), 164.02 (d,  $J = 260.5$  Hz), 137.95, 135.09 (d,  $J = 8.4$  Hz), 126.99 (d,  $J = 3.2$  Hz), 121.73 (d,  $J = 20.2$  Hz), 110.92, 101.61 (d,  $J = 16.0$  Hz); **HRMS** (ESI) calcd for  $\text{C}_8\text{H}_4\text{FNO}$   $[\text{M}+\text{Na}]^+$ : 172.0169, found 172.0168.

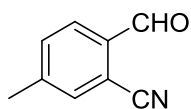

**1g**

**2-formyl-5-methylbenzonitrile (1g):**

$^1\text{H NMR}$  (400 MHz,  $\text{CDCl}_3$ )  $\delta$  10.19 (s, 1H), 7.87 (d,  $J = 8.0$  Hz, 1H), 7.58 (s, 1H), 7.55 (d,  $J = 8.0$  Hz, 1H), 2.45 (s, 3H);  $^{13}\text{C NMR}$  (100 MHz,  $\text{CDCl}_3$ )  $\delta$  188.10, 145.69, 134.36, 134.31, 133.84, 129.70, 115.98, 113.27, 21.33.

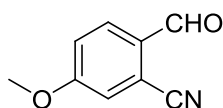

**1h**

**2-formyl-5-methoxybenzonitrile (1h):**

$^1\text{H NMR}$  (400 MHz,  $\text{CDCl}_3$ )  $\delta$  10.06 (s, 1H), 7.88 (d,  $J = 8.8$  Hz, 1H), 7.19 (s, 1H), 7.17 (d,  $J = 2.4$  Hz, 1H), 3.88 (s, 3H);  $^{13}\text{C NMR}$  (100 MHz,  $\text{CDCl}_3$ )  $\delta$  187.16, 163.54, 131.90, 129.60, 119.13, 118.44, 115.67, 114.83, 56.00.

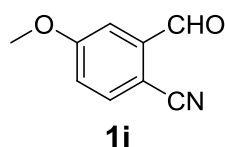

**2-formyl-4-methoxybenzonitrile (1i):**

<sup>1</sup>H NMR (400 MHz, CDCl<sub>3</sub>) δ 10.28 (s, 1H), 7.72 (d, *J* = 8.4 Hz, 1H), 7.47 (d, *J* = 2.8 Hz, 1H), 7.22-7.19 (m, 1H), 3.92 (s, 3H); <sup>13</sup>C NMR (100 MHz, CDCl<sub>3</sub>) δ 188.40, 163.06, 138.66, 135.40, 120.71, 116.19, 113.20, 105.71, 55.98.

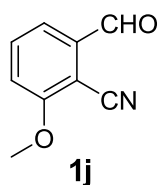

**2-formyl-6-methoxybenzonitrile (1j):**

<sup>1</sup>H NMR (400 MHz, CDCl<sub>3</sub>) δ 10.28 (s, 1H), 7.74 (t, *J* = 8.0 Hz, 1H), 7.60-7.58 (m, 1H), 7.31 (d, *J* = 8.4 Hz, 1H), 4.03 (s, 3H); <sup>13</sup>C NMR (100 MHz, CDCl<sub>3</sub>) δ 188.68, 162.16, 137.86, 134.28, 121.15, 116.58, 113.21, 102.41, 56.59; HRMS (ESI) calcd for C<sub>9</sub>H<sub>7</sub>NO<sub>2</sub> [M+H]<sup>+</sup>: 162.0550, found 162.0552.

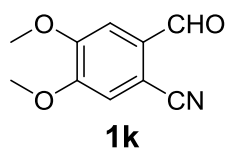

**2-formyl-4,5-dimethoxybenzonitrile (1k):**

<sup>1</sup>H NMR (400 MHz, CDCl<sub>3</sub>) δ 10.22 (s, 1H), 7.46 (s, 1H), 7.17 (s, 1H), 3.98 (d, *J* = 2.4 Hz, 6H); <sup>13</sup>C NMR (100 MHz, CDCl<sub>3</sub>) δ 187.42, 153.62, 152.81, 131.69, 115.95, 114.39, 109.39, 108.12, 56.61, 56.40.

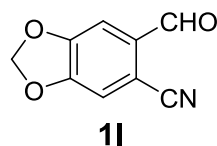

**6-formylbenzo[d][1,3]dioxole-5-carbonitrile (1l):**

<sup>1</sup>H NMR (400 MHz, CDCl<sub>3</sub>) δ 10.23 (s, 1H), 7.43 (s, 1H), 7.15 (s, 1H), 6.19 (s, 2H); <sup>13</sup>C NMR (100 MHz, CDCl<sub>3</sub>) δ 186.90, 152.54, 152.11, 134.22, 115.66, 112.22, 110.15, 107.57, 103.47.

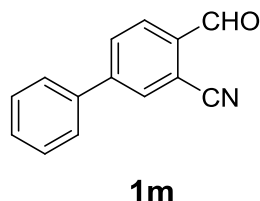

**2-formyl-5-phenylbenzonitrile(1m):**

<sup>1</sup>H NMR (400 MHz, CDCl<sub>3</sub>) δ 10.33 (s, 1H), 8.08 (d, *J* = 8.0 Hz, 1H), 8.00 (d, *J* = 2.0 Hz, 1H), 7.97-7.95 (m, 1H), 7.62-7.59 (m, 2H), 7.53-7.45 (m, 3H); <sup>13</sup>C NMR (100 MHz, CDCl<sub>3</sub>) δ 188.05, 146.98, 137.08, 134.88, 132.26, 131.30, 130.17, 129.35, 129.18, 127.04, 115.94, 113.92.

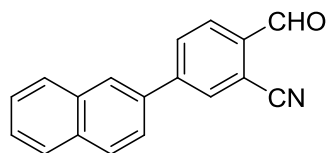

**1n**

**2-formyl-5-(naphthalen-2-yl)benzonitrile(1n):**

$^1\text{H NMR}$  (400 MHz,  $\text{CDCl}_3$ )  $\delta$  10.40 (s, 1H), 8.16-8.08 (m, 4H), 8.00-7.89 (m, 3H), 7.74-7.71 (m, 1H), 7.59-7.57 (m, 2H);  $^{13}\text{C NMR}$  (100 MHz,  $\text{CDCl}_3$ )  $\delta$  188.18, 147.31, 135.14, 134.63, 133.47, 133.40, 132.63, 131.71, 130.11, 129.35, 128.51, 127.77, 127.32, 127.06, 127.02, 124.38, 116.06, 114.59; **HRMS** (ESI) calcd for  $\text{C}_{18}\text{H}_{11}\text{NO}$   $[\text{M}+\text{Na}]^+$ : 280.0733, found 280.0733.

**3.2 Characterization of products 3a-3t.**

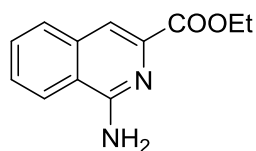

**3a**

**ethyl 1-aminoisoquinoline-3-carboxylate (3a):**

**3a** (132 mg) was obtained through the general procedure C in 80% yield as a light yellow solid. mp 204-206 °C;  $^1\text{H NMR}$  (400 MHz,  $\text{CDCl}_3$ )  $\delta$  7.93 (s, 1H), 7.87 (d,  $J = 8.4$  Hz, 1H), 7.81 (d,  $J = 8.0$  Hz, 1H), 7.68-7.64 (m, 1H), 7.60-7.56 (m, 1H), 5.88 (s, 2H), 4.46 (q,  $J = 7.2$  Hz, 2H), 1.43 (t,  $J = 7.2$  Hz, 3H);  $^{13}\text{C NMR}$  (100 MHz,  $\text{CDCl}_3$ )  $\delta$  166.09, 156.49, 140.05, 136.77, 130.60, 128.55, 128.27, 122.75, 119.41, 115.78, 61.40, 14.39; **HRMS** (ESI) calcd for  $\text{C}_{12}\text{H}_{12}\text{N}_2\text{O}_2$   $[\text{M}+\text{H}]^+$ : 217.0972, found 217.0967.

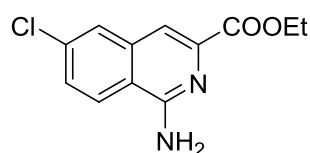

**3b**

**ethyl 1-amino-6-chloroisoquinoline-3-carboxylate (3b):**

**3b** (116 mg) was obtained through the general procedure C in 77 % yield as a light yellow solid. mp 164-167 °C;  $^1\text{H NMR}$  (400 MHz,  $\text{CDCl}_3$ )  $\delta$  7.81 (d,  $J = 8.8$  Hz, 1H), 7.74-7.72 (m, 2H), 7.47-7.44 (m, 1H), 6.38 (s, 2H), 4.42 (q,  $J = 7.2$  Hz, 2H), 1.42 (t,  $J = 7.2$  Hz, 3H);  $^{13}\text{C NMR}$  (100MHz,  $\text{CDCl}_3$ )  $\delta$  165.69, 156.74, 141.08, 137.81, 136.75, 128.72, 127.15, 124.60, 117.44, 114.19, 61.47, 14.32; **HRMS** (ESI) calcd for  $\text{C}_{12}\text{H}_{11}\text{ClN}_2\text{O}_2$   $[\text{M}+\text{H}]^+$ : 251.0582, found 251.0578.

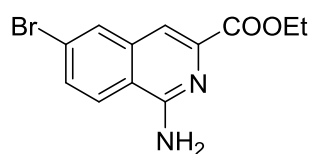

**3c**

**ethyl 1-amino-6-bromoisoquinoline-3-carboxylate (3c):**

**3c** (86 mg) was obtained through the general procedure C in 61% yield as a light yellow solid. mp

190-195 °C;  $^1\text{H NMR}$  (400 MHz,  $\text{CDCl}_3$ )  $\delta$  7.98 (d,  $J = 2.0$  Hz, 1H), 7.83 (s, 1H), 7.72 (d,  $J = 8.8$  Hz, 1H), 7.68-7.66 (m, 1H), 5.76 (s, 2H), 4.46 (q,  $J = 7.2$  Hz, 2H), 1.44 (t,  $J = 7.2$  Hz, 3H);  $^{13}\text{C NMR}$  (100 MHz,  $\text{CDCl}_3$ )  $\delta$  165.71, 156.41, 141.35, 138.30, 131.55, 130.69, 125.38, 124.45, 117.74, 114.61, 61.64, 14.38; **HRMS** (ESI) calcd for  $\text{C}_{12}\text{H}_{11}\text{BrN}_2\text{O}_2$   $[\text{M}+\text{H}]^+$ : 295.0077, found 295.0074.

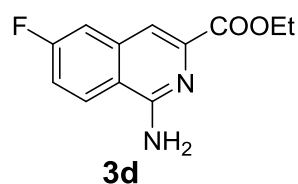

**ethyl 1-amino-6-fluoroisoquinoline-3-carboxylate (3d):**

**3d** (111 mg) was obtained through the general procedure C in 71% yield as a light yellow solid. mp 199-201 °C;  $^1\text{H NMR}$  (400 MHz,  $\text{DMSO-}d_6$ )  $\delta$  8.38-8.34 (m, 1H), 7.72-7.68 (m, 2H), 7.50-7.45 (m, 1H), 7.28 (s, 2H), 4.30 (q,  $J = 7.2$  Hz, 2H), 1.30 (t,  $J = 7.2$  Hz, 3H);  $^{13}\text{C NMR}$  (100 MHz,  $\text{DMSO-}d_6$ )  $\delta$  165.74, 162.92 (d,  $J = 247.2$  Hz), 157.43, 141.76, 138.69 (d,  $J = 10.6$  Hz), 127.61 (d,  $J = 9.6$  Hz), 117.14 (d,  $J = 24.4$  Hz), 115.97, 112.69 (d,  $J = 3.6$  Hz), 111.75 (d,  $J = 20.7$  Hz), 60.77, 14.41; **HRMS** (ESI) calcd for  $\text{C}_{12}\text{H}_{11}\text{FN}_2\text{O}_2$   $[\text{M}+\text{H}]^+$ : 235.0877, found 235.0872.

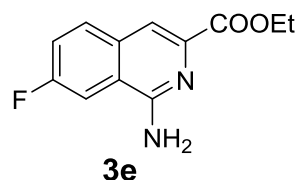

**ethyl 1-amino-7-fluoroisoquinoline-3-carboxylate(3e):**

**3e** (95 mg) was obtained through the general procedure C in 60% yield as a light yellow solid. mp 192-195 °C;  $^1\text{H NMR}$  (400 MHz,  $\text{DMSO-}d_6$ )  $\delta$  8.12 (d,  $J = 10.8$  Hz, 1H), 8.02-7.99 (m, 1H), 7.78 (s, 1H), 7.63-7.58 (m, 1H), 7.17 (s, 2H), 4.30 (q,  $J = 7.2$  Hz, 2H), 1.31 (t,  $J = 7.2$  Hz, 3H);  $^{13}\text{C NMR}$  (100 MHz,  $\text{DMSO-}d_6$ )  $\delta$  165.73, 161.20 (d,  $J = 244.7$  Hz), 156.97 (d,  $J = 4.3$  Hz), 140.05 (d,  $J = 2.5$  Hz), 133.57, 131.18 (d,  $J = 8.6$  Hz), 120.22 (d,  $J = 24.3$  Hz), 119.77 (d,  $J = 8.1$  Hz), 112.86, 108.58 (d,  $J = 22.1$  Hz), 60.61, 14.38; **HRMS** (ESI) calcd for  $\text{C}_{12}\text{H}_{11}\text{FN}_2\text{O}_2$   $[\text{M}+\text{H}]^+$ : 235.0877, found 235.0872.

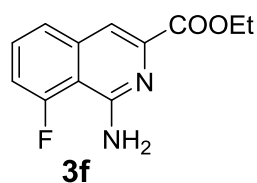

**ethyl 1-amino-8-fluoroisoquinoline-3-carboxylate (3f):**

**3f** (118 mg) was obtained through the general procedure C in 75% yield as a light yellow solid. mp 183-186 °C;  $^1\text{H NMR}$  (400 MHz,  $\text{DMSO-}d_6$ )  $\delta$  7.76-7.74 (m, 2H), 7.70-7.65 (m, 1H), 7.41-7.36 (m, 1H), 7.03 (s, 2H), 4.31 (q,  $J = 7.2$  Hz, 2H), 1.32 (t,  $J = 7.2$  Hz, 3H);  $^{13}\text{C NMR}$  (100 MHz,  $\text{DMSO-}d_6$ )  $\delta$  165.39, 159.11 (d,  $J = 249.9$  Hz), 154.96 (d,  $J = 4.2$  Hz), 141.42, 139.53, 131.55 (d,  $J = 9.9$  Hz), 124.50 (d,  $J = 3.5$  Hz), 113.40 (d,  $J = 23.3$  Hz), 112.32, 108.41 (d,  $J = 11.7$  Hz), 60.84, 14.40; **HRMS** (ESI) calcd for  $\text{C}_{12}\text{H}_{11}\text{FN}_2\text{O}_2$   $[\text{M}+\text{H}]^+$ : 235.0877, found 235.0870.

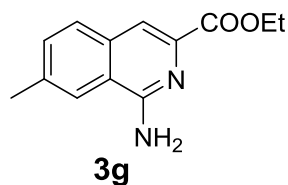

**ethyl 1-amino-7-methylisoquinoline-3-carboxylate (3g):**

**3g** (120 mg) was obtained through the general procedure C in 76% yield as a light yellow solid. mp 198-201 °C;  $^1\text{H NMR}$  (400 MHz, DMSO- $d_6$ )  $\delta$  8.09 (s, 1H), 7.79 (d,  $J$  = 8.4 Hz, 1H), 7.72 (s, 1H), 7.52 (d,  $J$  = 8.0 Hz, 1H), 7.04 (s, 2H), 4.30 (q,  $J$  = 7.2 Hz, 2H), 2.47 (s, 3H), 1.31 (t,  $J$  = 7.2 Hz, 3H);  $^{13}\text{C NMR}$  (100 MHz, DMSO- $d_6$ )  $\delta$  165.89, 156.90, 139.59, 137.75, 134.37, 132.31, 127.98, 123.28, 119.07, 113.30, 60.46, 21.61, 14.41; **HRMS** (ESI) calcd for  $\text{C}_{13}\text{H}_{14}\text{N}_2\text{O}_2$   $[\text{M}+\text{H}]^+$ : 231.1128, found 231.1121.

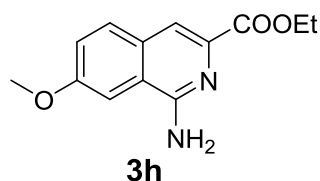

**ethyl 1-amino-7-methoxyisoquinoline-3-carboxylate (3h):**

**3h** (101 mg) was obtained through the general procedure C in 66% yield as a light yellow solid. mp 203-205 °C;  $^1\text{H NMR}$  (400 MHz, DMSO- $d_6$ )  $\delta$  7.83 (d,  $J$  = 8.8 Hz, 1H), 7.74 (s, 1H), 7.68 (d,  $J$  = 2.0 Hz, 1H), 7.34-7.31 (m, 1H), 7.07 (s, 2H), 4.29 (q,  $J$  = 7.2 Hz, 2H), 3.89 (s, 3H), 1.30 (t,  $J$  = 7.2 Hz, 3H);  $^{13}\text{C NMR}$  (100 MHz, DMSO- $d_6$ )  $\delta$  166.02, 159.27, 156.56, 138.27, 131.11, 129.90, 121.97, 120.30, 113.56, 103.96, 60.46, 55.86, 14.48; **HRMS** (ESI) calcd for  $\text{C}_{13}\text{H}_{14}\text{N}_2\text{O}_3$   $[\text{M}+\text{H}]^+$ : 247.1077, found 247.1072.

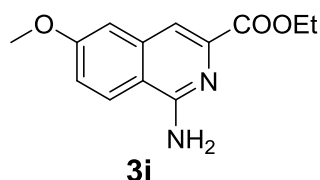

**ethyl 1-amino-6-methoxyisoquinoline-3-carboxylate (3i):**

**3i** (117 mg) was obtained through the general procedure C in 77% yield as a light yellow solid. mp 195-199 °C;  $^1\text{H NMR}$  (400 MHz, DMSO- $d_6$ )  $\delta$  8.18 (d,  $J$  = 8.8 Hz, 1H), 7.69 (s, 1H), 7.34 (d,  $J$  = 2.4 Hz, 1H), 7.22-7.19 (m, 1H), 7.05 (s, 2H), 4.29 (q,  $J$  = 7.2 Hz, 2H), 3.87 (s, 3H), 1.31 (t,  $J$  = 7.2 Hz, 3H);  $^{13}\text{C NMR}$  (100 MHz, DMSO- $d_6$ )  $\delta$  165.98, 160.62, 157.28, 141.12, 138.71, 126.00, 119.06, 113.72, 113.03, 107.19, 60.60, 55.56, 14.44; **HRMS** (ESI) calcd for  $\text{C}_{13}\text{H}_{14}\text{N}_2\text{O}_3$   $[\text{M}+\text{H}]^+$ : 247.1077, found 247.1075.

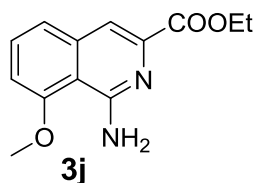

**ethyl 1-amino-8-methoxyisoquinoline-3-carboxylate (3j):**

**3j** (106 mg) was obtained through the general procedure C in 69% yield as a light yellow solid. mp 136-141 °C;  $^1\text{H NMR}$  (400 MHz, DMSO- $d_6$ )  $\delta$  7.61 (s, 1H), 7.56 (t,  $J$  = 8.0 Hz, 1H), 7.41 (d,  $J$  = 8.0 Hz,



1H), 7.34 (s, 2H), 7.06 (d,  $J = 8.0$  Hz, 1H), 4.30 (q,  $J = 7.2$  Hz, 2H), 3.97 (s, 3H), 1.31 (t,  $J = 7.2$  Hz, 3H);  $^{13}\text{C}$  NMR (100 MHz, DMSO- $d_6$ )  $\delta$  165.67, 157.23, 156.93, 140.90, 139.44, 131.27, 120.29, 112.48, 109.90, 108.23, 60.66, 56.21, 14.42; HRMS (ESI) calcd for  $\text{C}_{13}\text{H}_{14}\text{N}_2\text{O}_3$   $[\text{M}+\text{H}]^+$ : 247.1077, found 247.1073.

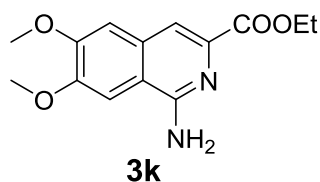

**ethyl 1-amino-6,7-dimethoxyisoquinoline-3-carboxylate (3k):**

**3k** (110 mg) was obtained through the general procedure C in 76% yield as a light yellow solid. mp 236-238 °C;  $^1\text{H}$  NMR (400 MHz,  $\text{CDCl}_3$ )  $\delta$  7.88 (s, 1H), 7.11 (s, 1H), 7.09 (s, 1H), 5.51 (s, 2H), 4.43 (q,  $J = 7.2$  Hz, 2H), 4.00 (s, 3H), 3.97 (s, 3H), 1.41 (t,  $J = 7.2$  Hz, 3H);  $^{13}\text{C}$  NMR (100 MHz, DMSO- $d_6$ )  $\delta$  166.05, 156.15, 152.22, 150.40, 138.85, 132.44, 113.88, 113.12, 107.32, 103.93, 60.39, 56.12, 55.79, 14.48; HRMS (ESI) calcd for  $\text{C}_{14}\text{H}_{16}\text{N}_2\text{O}_4$   $[\text{M}+\text{H}]^+$ : 277.1183, found 277.1177.

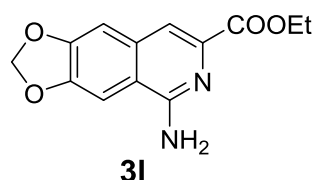

**ethyl 5-amino-[1,3]dioxolo[4,5-g]isoquinoline-7-carboxylate (3l):**

**3l** (110 mg) was obtained through the general procedure C in 74% yield as a light yellow solid. mp 208-211 °C;  $^1\text{H}$  NMR (400 MHz, DMSO- $d_6$ )  $\delta$  7.69 (s, 1H), 7.65 (s, 1H), 7.35 (s, 1H), 6.82 (s, 2H), 6.18 (s, 2H), 4.28 (q,  $J = 7.2$  Hz, 2H), 1.30 (t,  $J = 7.2$  Hz, 3H);  $^{13}\text{C}$  NMR (100 MHz, DMSO- $d_6$ )  $\delta$  165.94, 156.46, 150.37, 148.84, 139.29, 134.23, 115.01, 113.51, 104.47, 102.10, 100.99, 60.47, 14.47; HRMS (ESI) calcd for  $\text{C}_{13}\text{H}_{12}\text{N}_2\text{O}_4$   $[\text{M}+\text{H}]^+$ : 261.0870, found 261.0860.

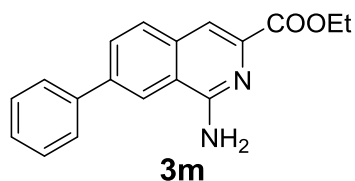

**ethyl 1-amino-7-phenylisoquinoline-3-carboxylate (3m):**

**3m** (125 mg) was obtained through the general procedure C in 89% yield as a light yellow solid. mp 184-187 °C;  $^1\text{H}$  NMR (400 MHz, DMSO- $d_6$ )  $\delta$  8.65 (s, 1H), 8.01-7.95 (m, 2H), 7.86 (d,  $J = 7.2$  Hz, 2H), 7.79 (s, 1H), 7.51-7.37 (m, 5H), 4.32 (q,  $J = 7.2$  Hz, 2H), 1.32 (t,  $J = 7.2$  Hz, 3H);  $^{13}\text{C}$  NMR (100 MHz, DMSO- $d_6$ )  $\delta$  165.90, 157.76, 140.55, 139.60, 139.40, 135.66, 129.26, 129.11, 128.91, 128.01, 127.19, 121.73, 119.39, 113.02, 60.67, 14.46; HRMS (ESI) calcd for  $\text{C}_{18}\text{H}_{16}\text{N}_2\text{O}_2$   $[\text{M}+\text{H}]^+$ : 293.1285, found 293.1279.

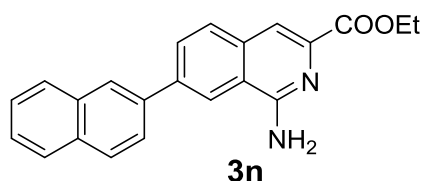

**ethyl 1-amino-7-(naphthalen-2-yl)isoquinoline-3-carboxylate (3n):**

**3n** (89 mg) was obtained through the general procedure C in 67% yield as a light yellow amorphous solid

$^1\text{H NMR}$  (400 MHz,  $\text{DMSO-}d_6$ )  $\delta$  8.77 (s, 1H), 8.45 (s, 1H), 8.24-8.21 (m, 1H), 8.11-8.08 (m, 2H), 8.05-8.01 (m, 2H), 7.98-7.96 (m, 1H), 7.80 (s, 1H), 7.60-7.53 (m, 2H), 7.36 (s, 2H), 4.33 (q,  $J = 7.2$  Hz, 2H), 1.34 (t,  $J = 7.2$  Hz, 3H);  $^{13}\text{C NMR}$  (100 MHz,  $\text{DMSO-}d_6$ )  $\delta$  165.80, 157.65, 140.51, 139.29, 136.63, 135.68, 133.40, 132.54, 129.43, 128.94, 128.63, 128.35, 127.64, 126.65, 126.48, 125.88, 125.28, 121.93, 119.34, 112.93, 60.61, 14.43; **HRMS** (ESI) calcd for  $\text{C}_{22}\text{H}_{18}\text{N}_2\text{O}_2$   $[\text{M}+\text{H}]^+$ : 343.1441, found 343.1434.

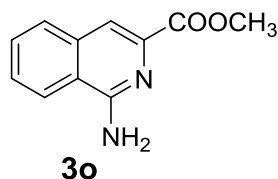

**methyl 1-aminoisoquinoline-3-carboxylate (3o):**

**3o** (107 mg) was obtained through the general procedure C in 69% yield as a light yellow solid. mp 209-210 °C;  $^1\text{H NMR}$  (400 MHz,  $\text{DMSO-}d_6$ )  $\delta$  8.27 (d,  $J = 8.0$  Hz, 1H), 7.90 (d,  $J = 8.0$  Hz, 1H), 7.76 (s, 1H), 7.69 (t,  $J = 8.0$  Hz, 1H), 7.63-7.59 (m, 1H), 7.20 (s, 2H), 3.84 (s, 3H);  $^{13}\text{C NMR}$  (100 MHz,  $\text{DMSO-}d_6$ )  $\delta$  166.37, 157.47, 140.19, 136.47, 130.65, 128.22, 128.05, 124.12, 118.98, 113.32, 51.97; **HRMS** (ESI) calcd for  $\text{C}_{11}\text{H}_{10}\text{N}_2\text{O}_2$   $[\text{M}+\text{H}]^+$ : 203.0815, found 203.0810.

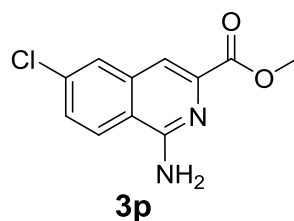

**methyl 1-amino-6-chloroisoquinoline-3-carboxylate (3p):**

**3p** (83 mg) was obtained through the general procedure C in 58% yield as a light yellow solid. mp 203-207 °C;  $^1\text{H NMR}$  (400 MHz,  $\text{DMSO-}d_6$ )  $\delta$  8.29 (d,  $J = 8.8$  Hz, 1H), 8.02 (d,  $J = 2.4$  Hz, 1H), 7.71 (s, 1H), 7.64-7.61 (m, 1H), 7.28 (s, 2H), 3.84 (s, 3H);  $^{13}\text{C NMR}$  (100 MHz,  $\text{DMSO-}d_6$ )  $\delta$  166.06, 157.39, 141.49, 137.89, 135.46, 128.09, 126.81, 126.46, 117.19, 112.17, 52.00; **HRMS** (ESI) calcd for  $\text{C}_{11}\text{H}_9\text{ClN}_2\text{O}_2$   $[\text{M}+\text{H}]^+$ : 237.0425, found 237.0427.

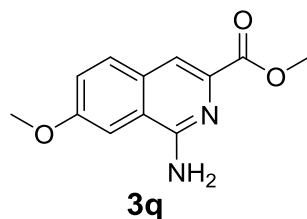

**methyl 1-amino-7-methoxyisoquinoline-3-carboxylate (3q):**

**3q** (89 mg) was obtained through the general procedure C in 62% yield as a light yellow solid. mp 211-214 °C;  $^1\text{H NMR}$  (400 MHz,  $\text{DMSO-}d_6$ )  $\delta$  7.83 (d,  $J = 8.8$  Hz, 1H), 7.74 (s, 1H), 7.68 (d,  $J = 2.4$  Hz, 1H), 7.34-7.32 (m, 1H), 7.04 (s, 2H), 3.90 (s, 3H), 3.83 (s, 3H);  $^{13}\text{C NMR}$  (100 MHz,  $\text{DMSO-}d_6$ )  $\delta$  166.45, 159.28, 156.52, 137.97, 131.06, 129.88, 121.91, 120.30, 113.60, 103.98, 55.83, 51.76; **HRMS** (ESI) calcd for  $\text{C}_{12}\text{H}_{12}\text{N}_2\text{O}_3$   $[\text{M}+\text{H}]^+$ : 233.0921, found 233.0925.

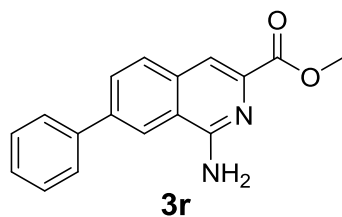

**methyl 1-amino-7-phenylisoquinoline-3-carboxylate(3r):**

**3r** (95 mg) was obtained through the general procedure C in 71% yield as a light yellow solid. mp 206-208 °C;  $^1\text{H NMR}$  (400 MHz,  $\text{CDCl}_3$ )  $\delta$  8.00 (s, 2H), 7.94-7.88 (m, 2H), 7.68-7.66 (m, 2H), 7.51-7.47 (m, 2H), 7.43-7.39 (m, 1H), 5.68 (s, 2H), 4.00 (s, 3H);  $^{13}\text{C NMR}$  (100 MHz,  $\text{CDCl}_3$ )  $\delta$  166.53, 156.60, 141.37, 140.02, 139.54, 135.69, 130.16, 128.97, 127.96, 127.31, 120.83, 119.74, 115.74, 53.37, 52.53; **HRMS** (ESI) calcd for  $\text{C}_{17}\text{H}_{14}\text{N}_2\text{O}_2$   $[\text{M}+\text{H}]^+$ : 279.1128, found 279.1131.

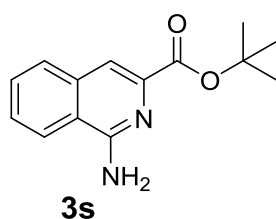

**tert-butyl 1-aminoisoquinoline-3-carboxylate (3s):**

**3s** (100 mg) was obtained through the general procedure C in 54% yield as a light yellow amorphous solid.

$^1\text{H NMR}$  (400 MHz,  $\text{CDCl}_3$ )  $\delta$  7.86-7.82 (m, 3H), 7.70-7.66 (m, 1H), 7.63-7.59 (m, 1H), 5.36 (s, 2H), 1.65 (s, 9H);  $^{13}\text{C NMR}$  (100 MHz,  $\text{DMSO}-d_6$ )  $\delta$  164.98, 157.23, 141.76, 136.45, 130.47, 127.98, 127.67, 124.04, 118.68, 112.71, 80.33, 27.96; **HRMS** (ESI) calcd for  $\text{C}_{14}\text{H}_{16}\text{N}_2\text{O}_2$   $[\text{M}+\text{H}]^+$ : 245.1285, found 245.1281.

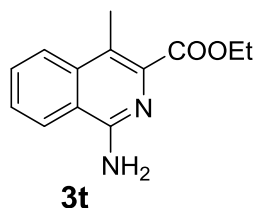

**ethyl 1-amino-4-methylisoquinoline-3-carboxylate (3t):**

**3t** (32 mg) was obtained through the general procedure C in 20% yield as a light yellow solid. mp 145-146 °C;  $^1\text{H NMR}$  (400 MHz,  $\text{CDCl}_3$ )  $\delta$  8.03 (d,  $J = 8.4$  Hz, 1H), 7.85 (d,  $J = 8.0$  Hz, 1H), 7.76-7.72 (m, 1H), 7.62-7.58 (m, 1H), 5.12 (s, 2H), 4.47 (q,  $J = 7.2$  Hz, 2H), 2.67 (s, 3H), 1.45 (t,  $J = 7.2$  Hz, 3H);  $^{13}\text{C NMR}$  (100 MHz,  $\text{DMSO}-d_6$ )  $\delta$  167.87, 155.57, 141.30, 136.47, 130.49, 126.59, 124.36, 124.19, 118.00, 114.11, 60.57, 14.27, 13.24; **HRMS** (ESI) calcd for  $\text{C}_{13}\text{H}_{14}\text{N}_2\text{O}_2$   $[\text{M}+\text{H}]^+$ : 231.1128, found 231.1120.

#### 4. X-Ray ellipsoid plots of 3a (CDCC 1846237)

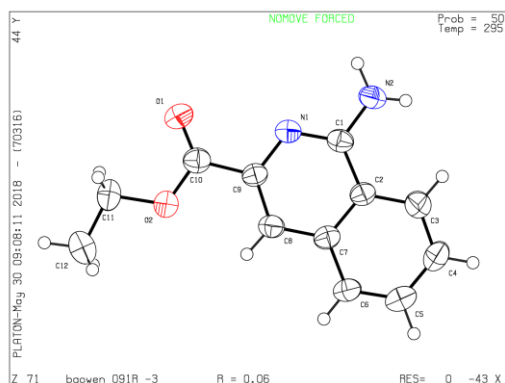

#### 5. References

- (1) Sun, C.; Xu, B. *J. Org. Chem.*, **2008**, *73*, 7361.
- (2) Bert, K.; Noel, T.; Kimpe, W.; Goeman, J. L.; Van der Eycken, J. *Org. Biomol. Chem.*, **2012**, *10*, 8539.

—10.307

8.012  
8.006  
7.793  
7.773  
7.730  
7.724  
7.709  
7.703  
—7.260

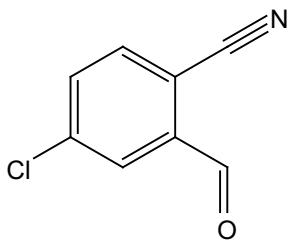

1b

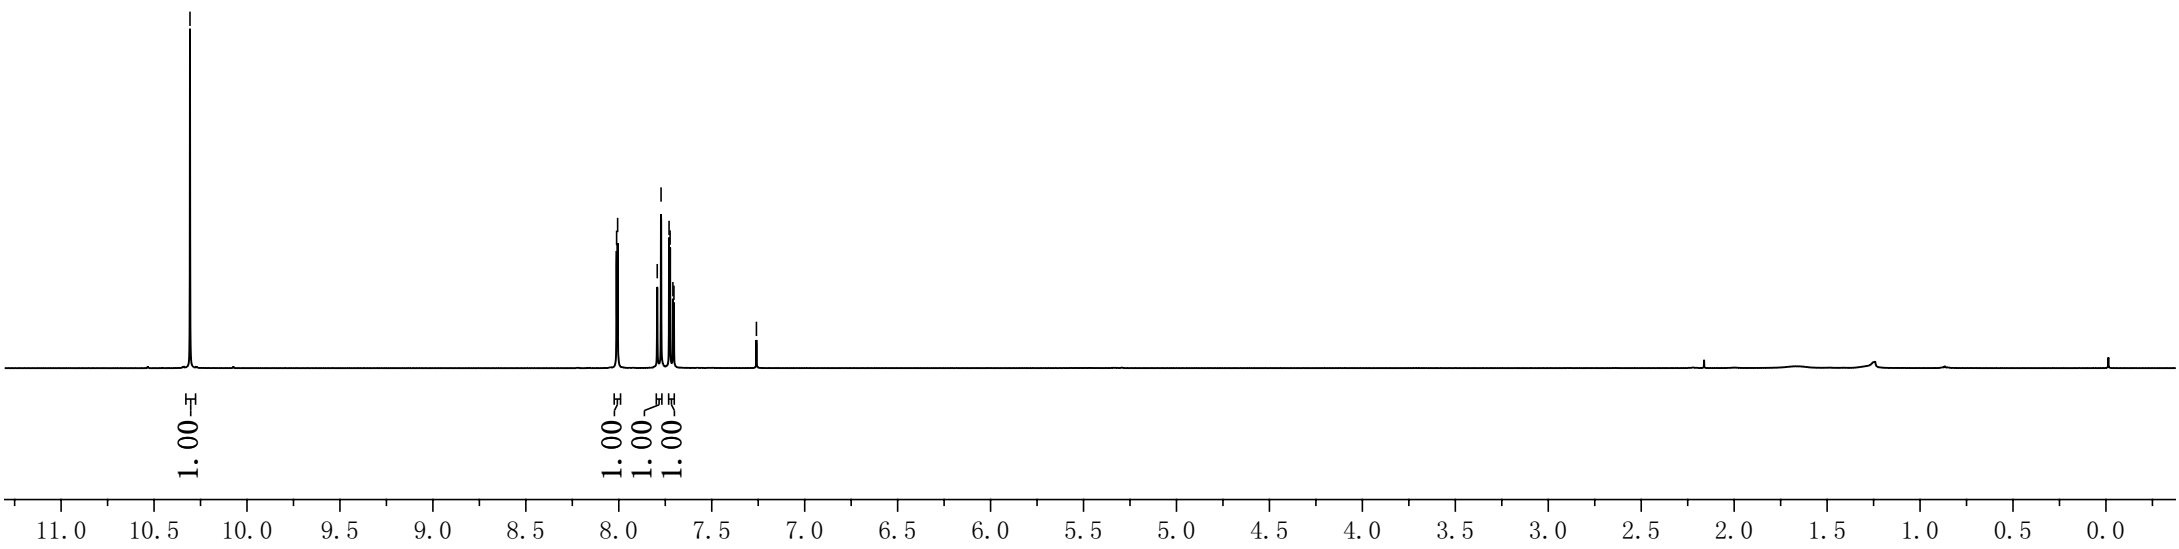

-187.160

140.463  
137.960  
135.038  
134.347  
129.543

-115.158  
-112.080

77.318  
77.000  
76.681

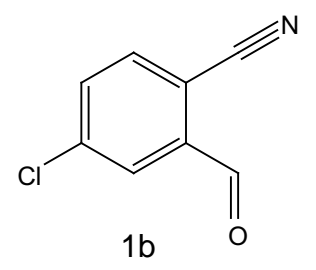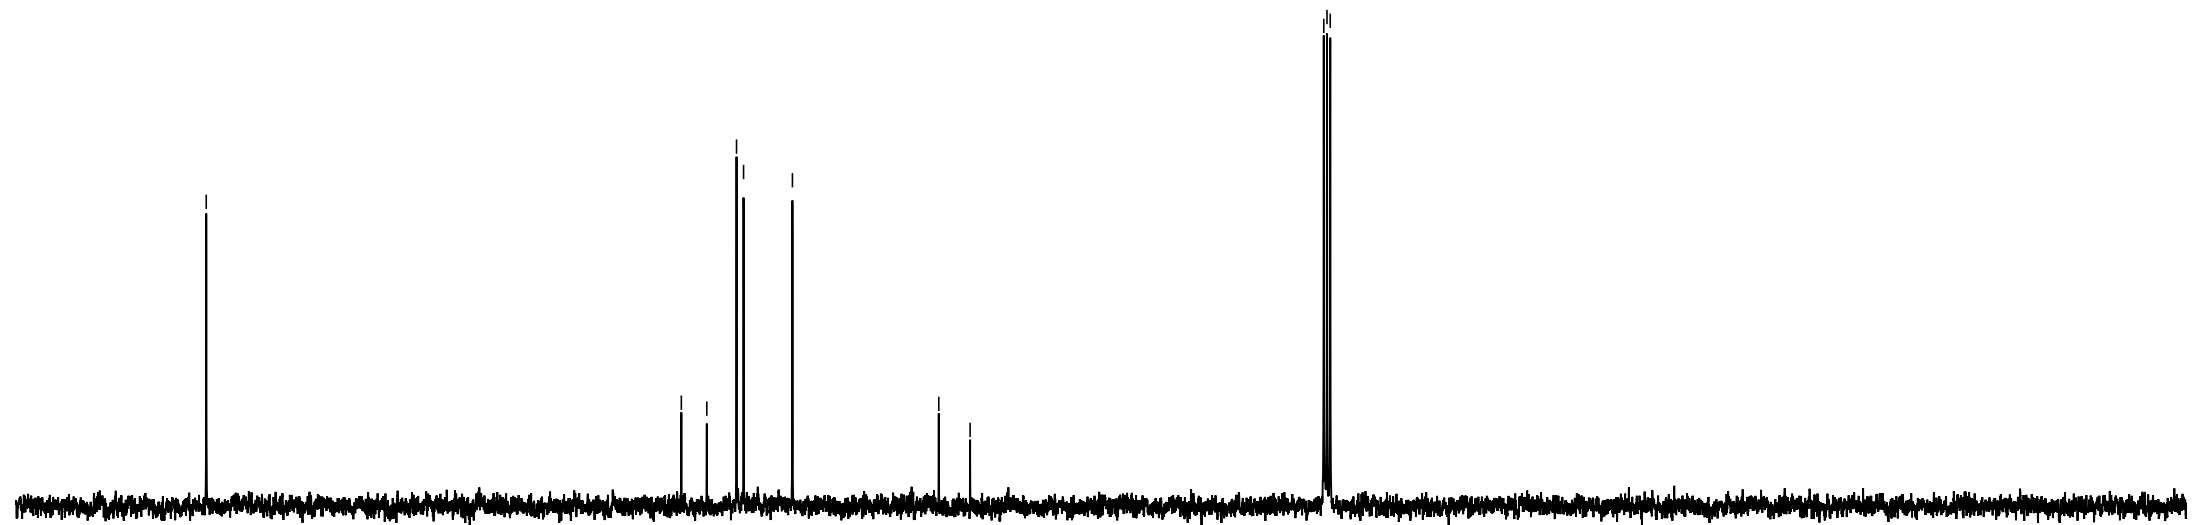

200 190 180 170 160 150 140 130 120 110 100 90 80 70 60 50 40 30 20 10 0

S14

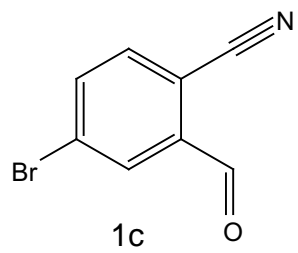

—10.282

8.165  
8.160  
7.896  
7.891  
7.875  
7.870  
7.711  
7.691  
—7.260

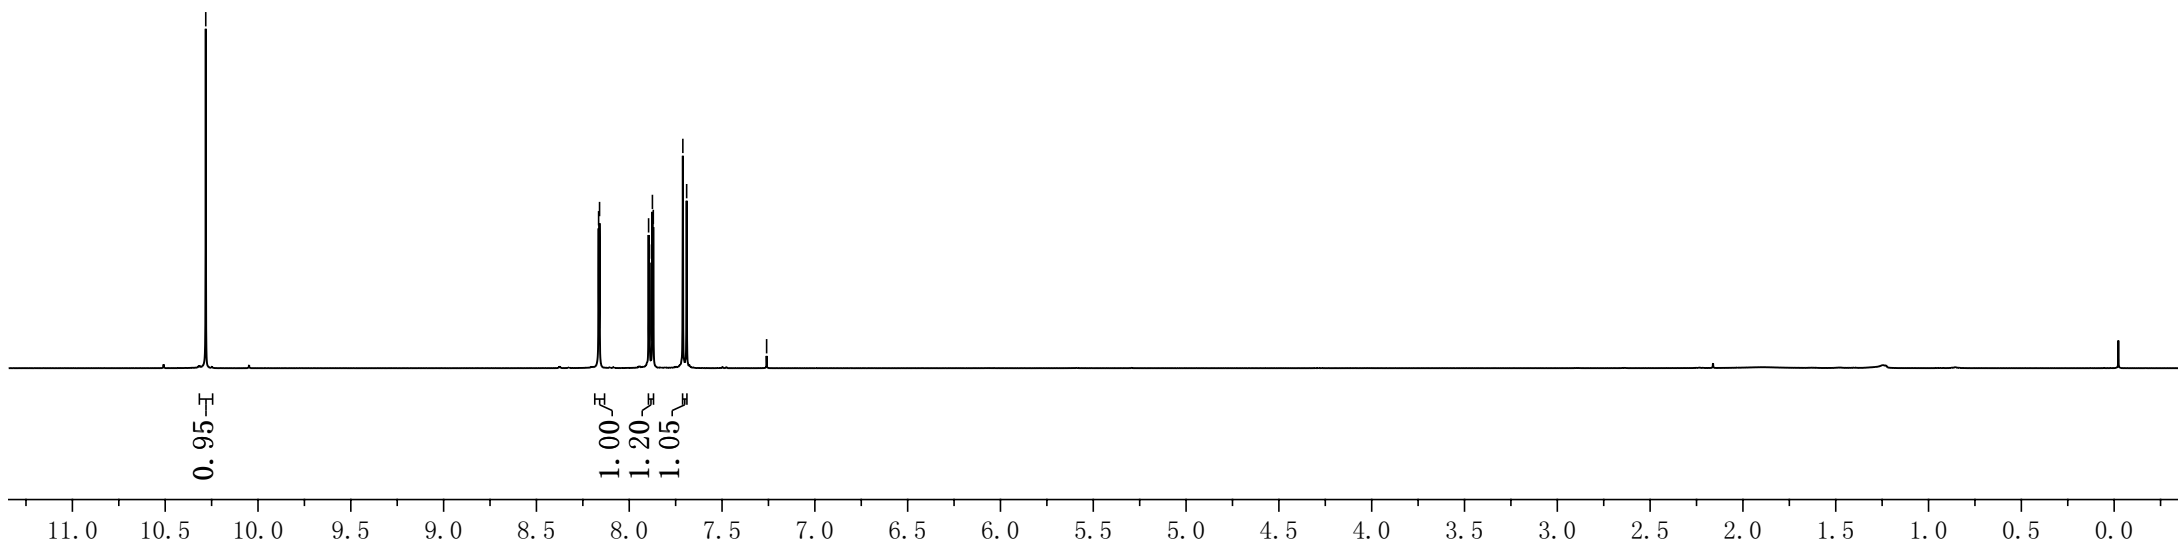

—187.099

137.802  
137.305  
135.001  
132.563  
128.692

—115.274  
—112.523

77.319  
77.000  
76.682

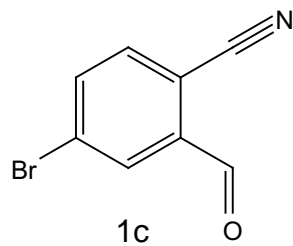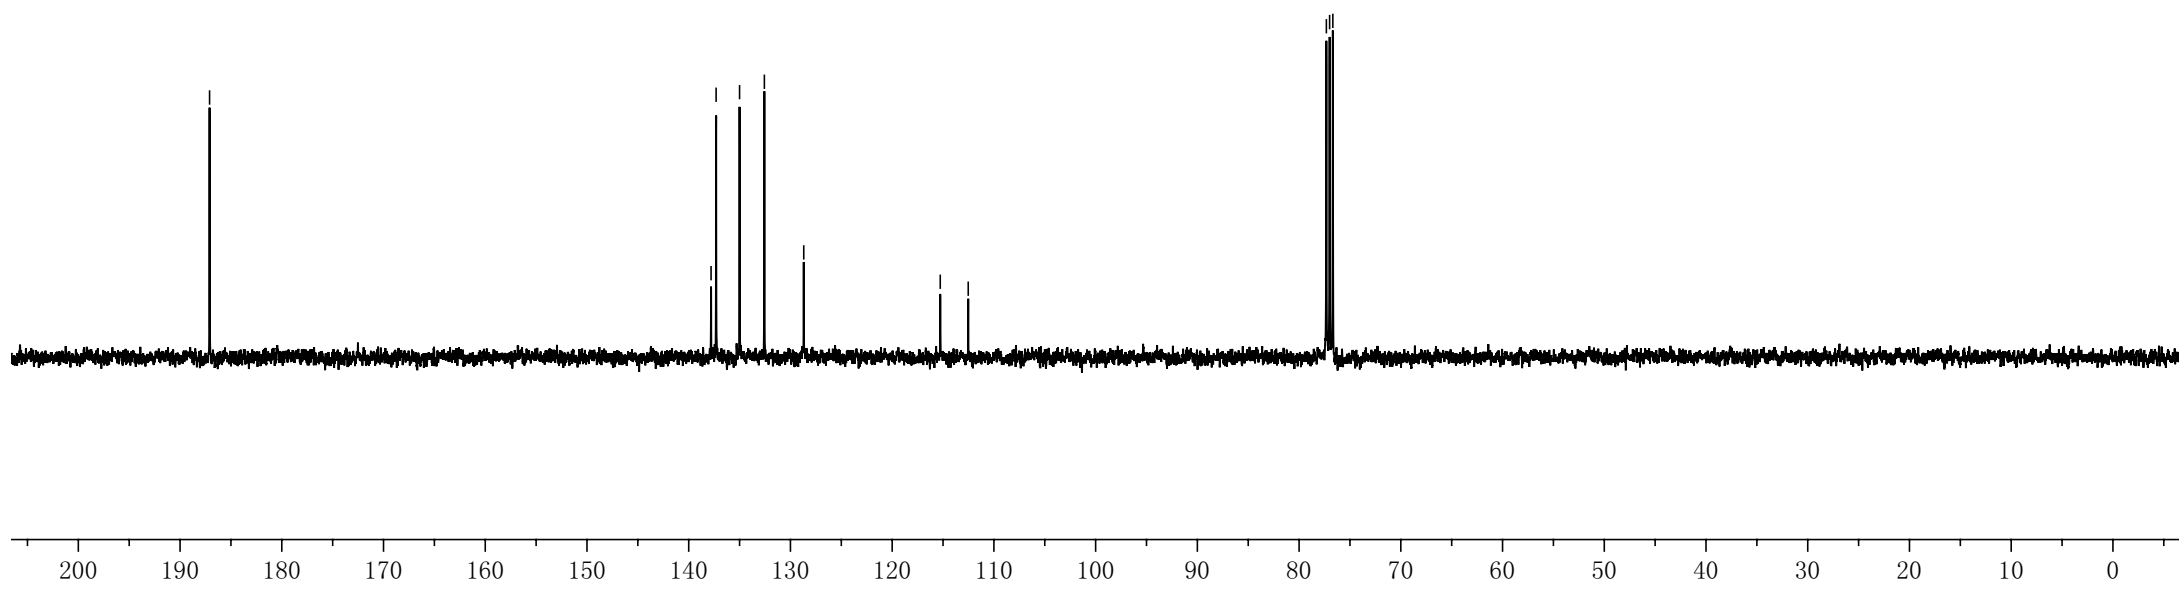



10.313  
10.307

7.883  
7.871  
7.862  
7.850  
7.726  
7.719  
7.706  
7.699  
7.474  
7.467  
7.455  
7.452  
7.448  
7.446  
7.434  
7.427  
7.260

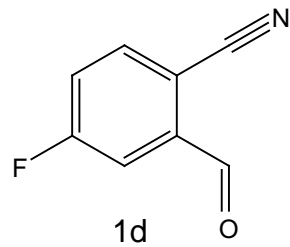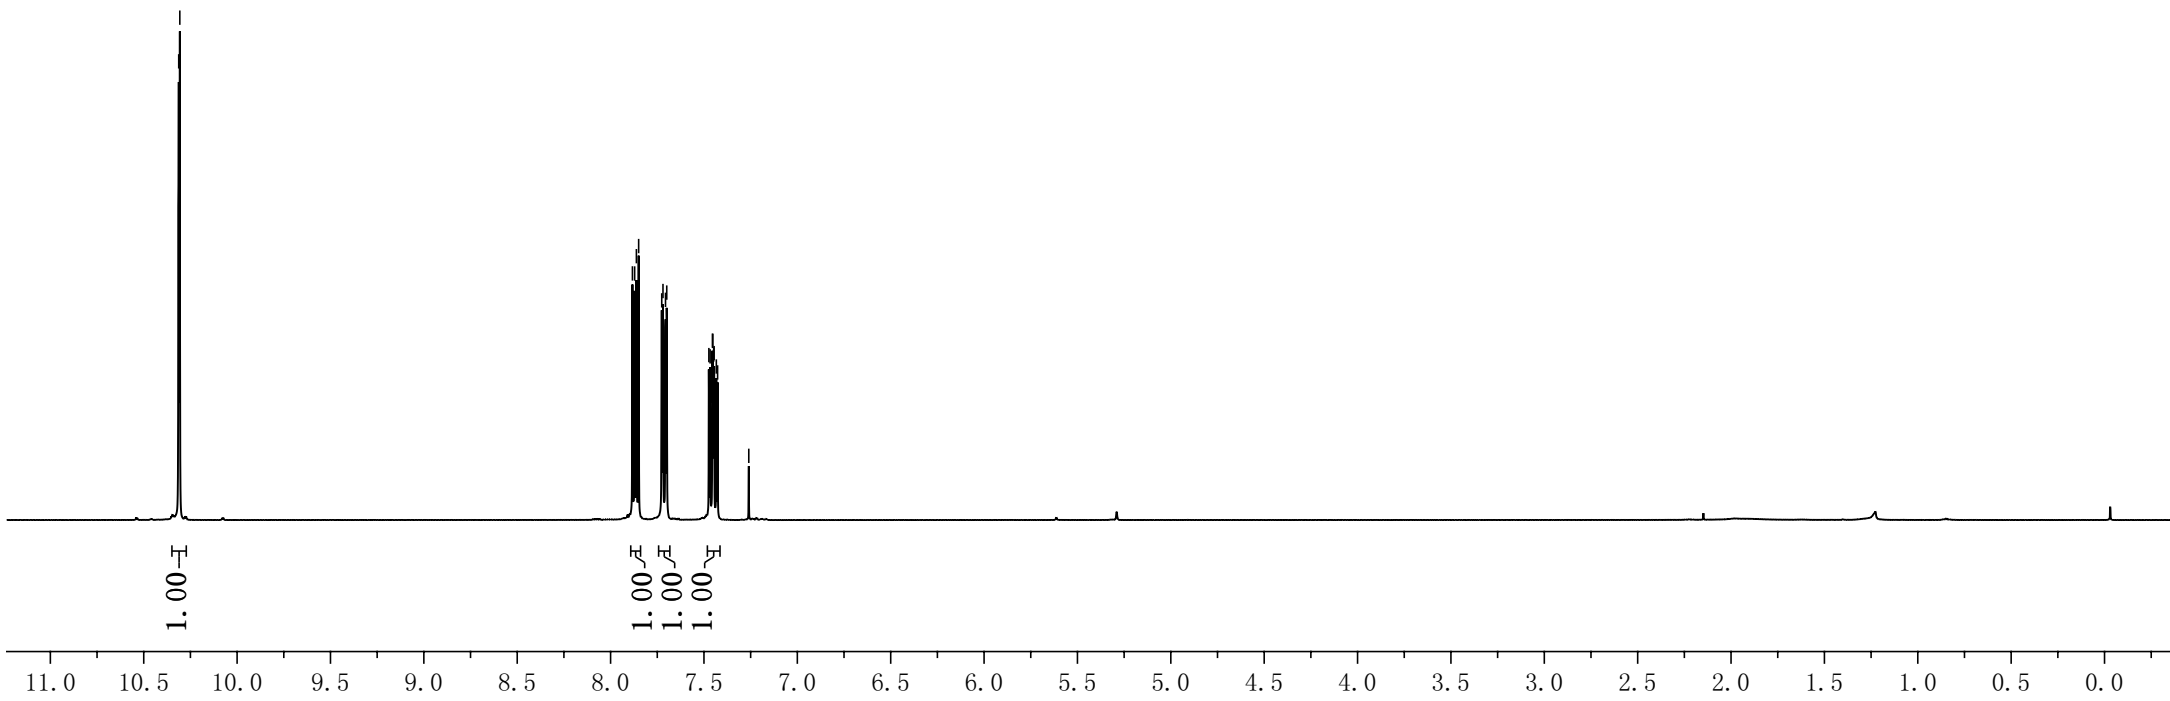

-187.058

<165.766  
<164.044

<139.479  
<139.429  
<136.397  
<136.338

<121.751  
<121.599  
<116.406  
<116.249  
<115.028  
<109.827  
<109.804

<77.213  
<77.000  
<76.788

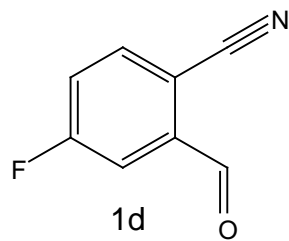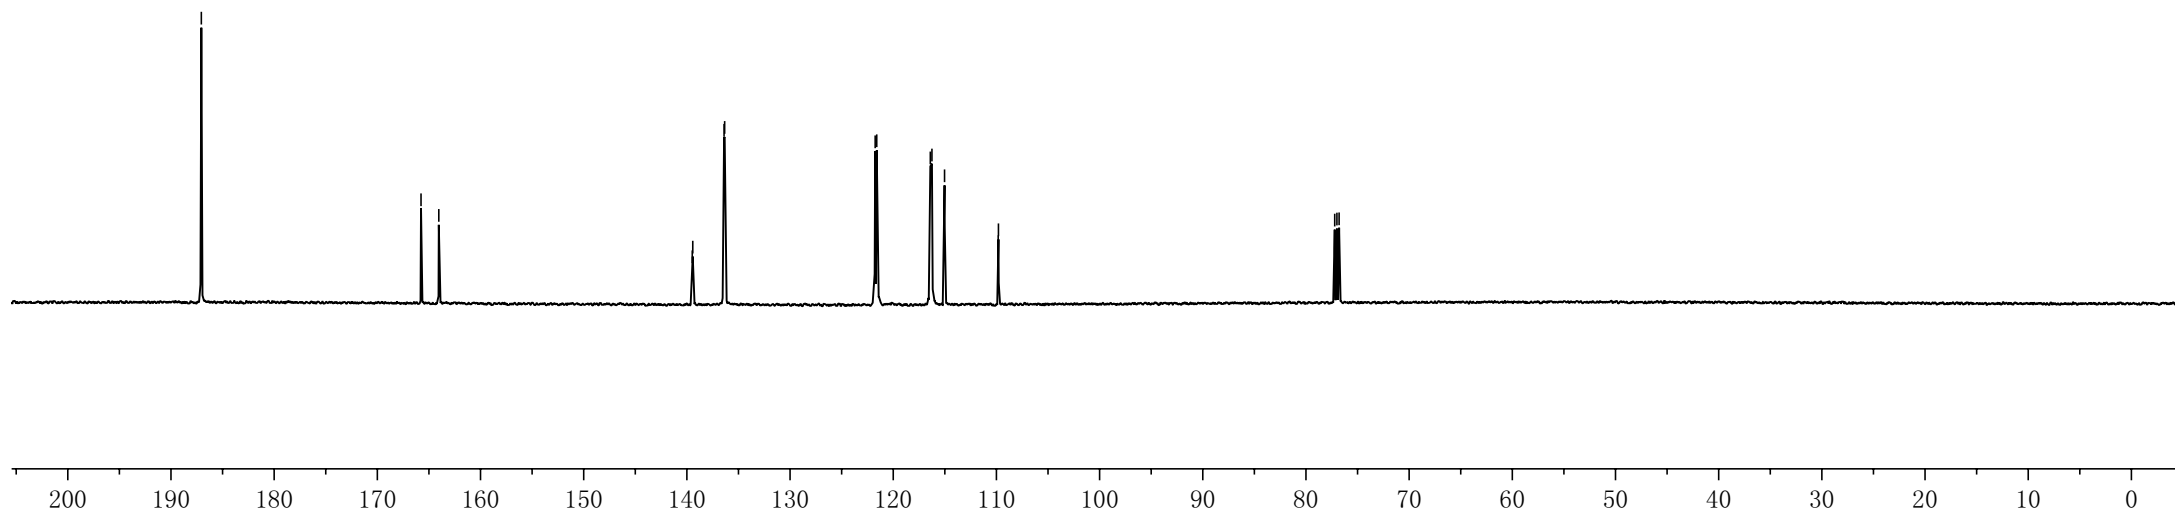

—10.264

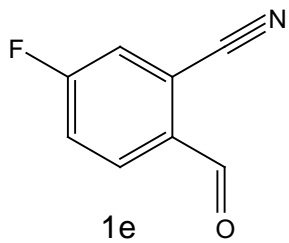

8.091  
8.083  
8.077  
8.068  
7.532  
7.527  
7.519  
7.514  
7.499  
7.498  
7.495  
7.494  
7.486  
7.485  
7.483  
7.482  
7.481  
7.479  
7.472  
7.471  
7.468  
7.466  
7.260

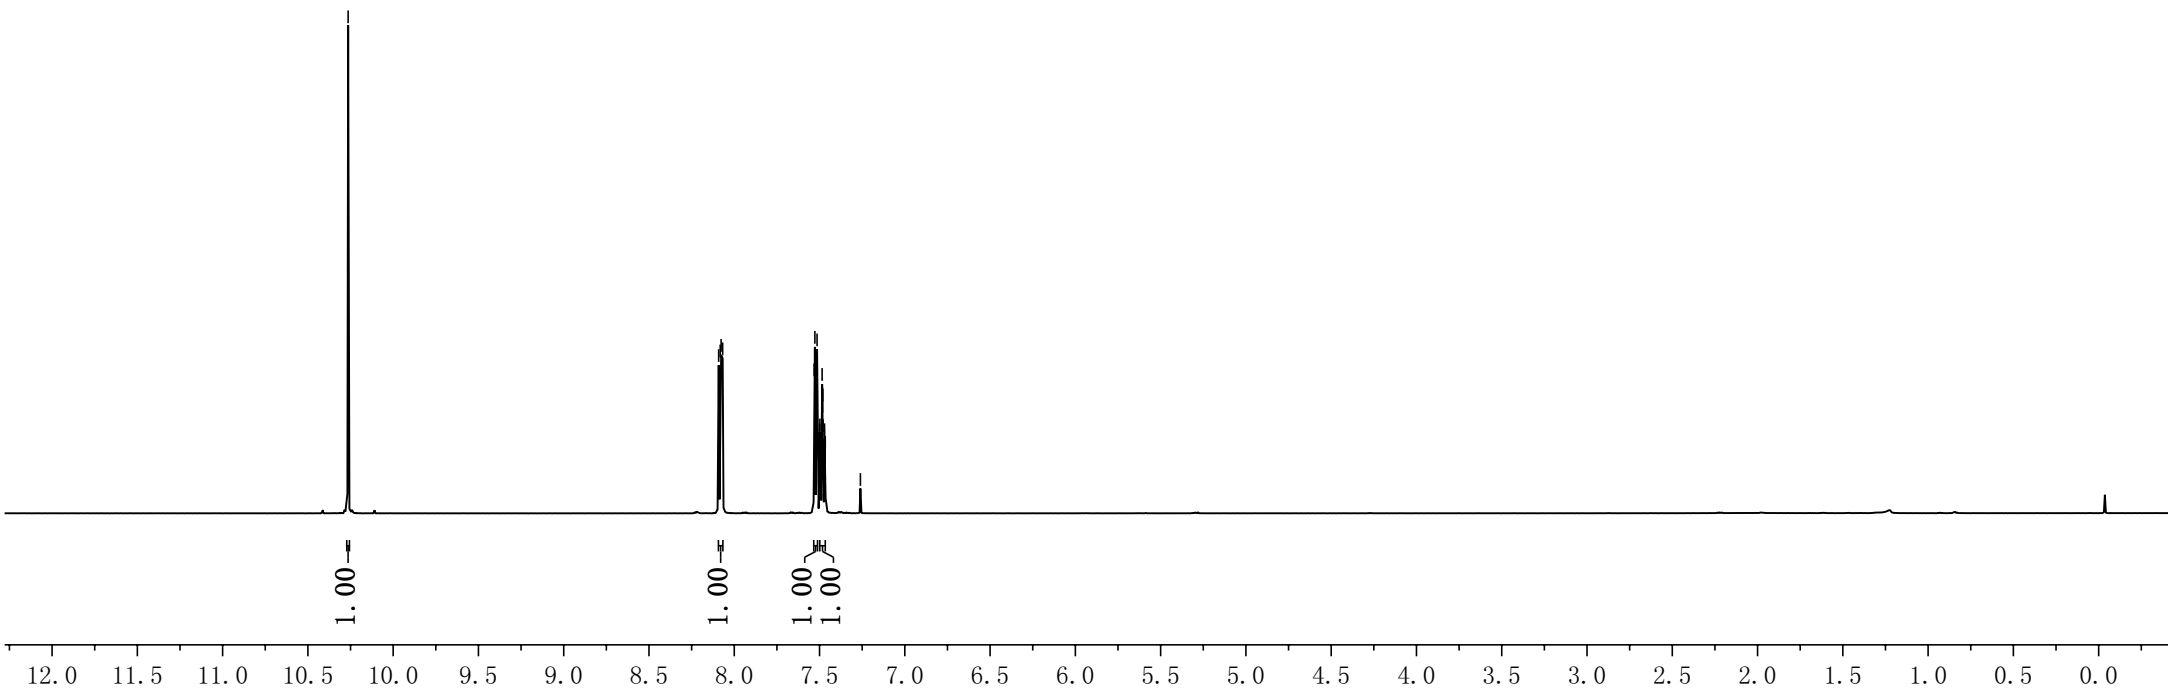

—186.810

~166.053  
~164.326

133.523  
132.328  
132.265  
121.249  
121.077  
121.014  
120.874  
115.997  
115.928  
114.596

77.215  
77.003  
76.791

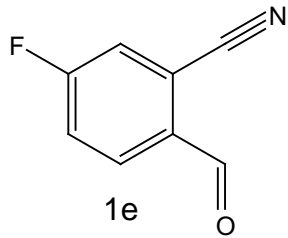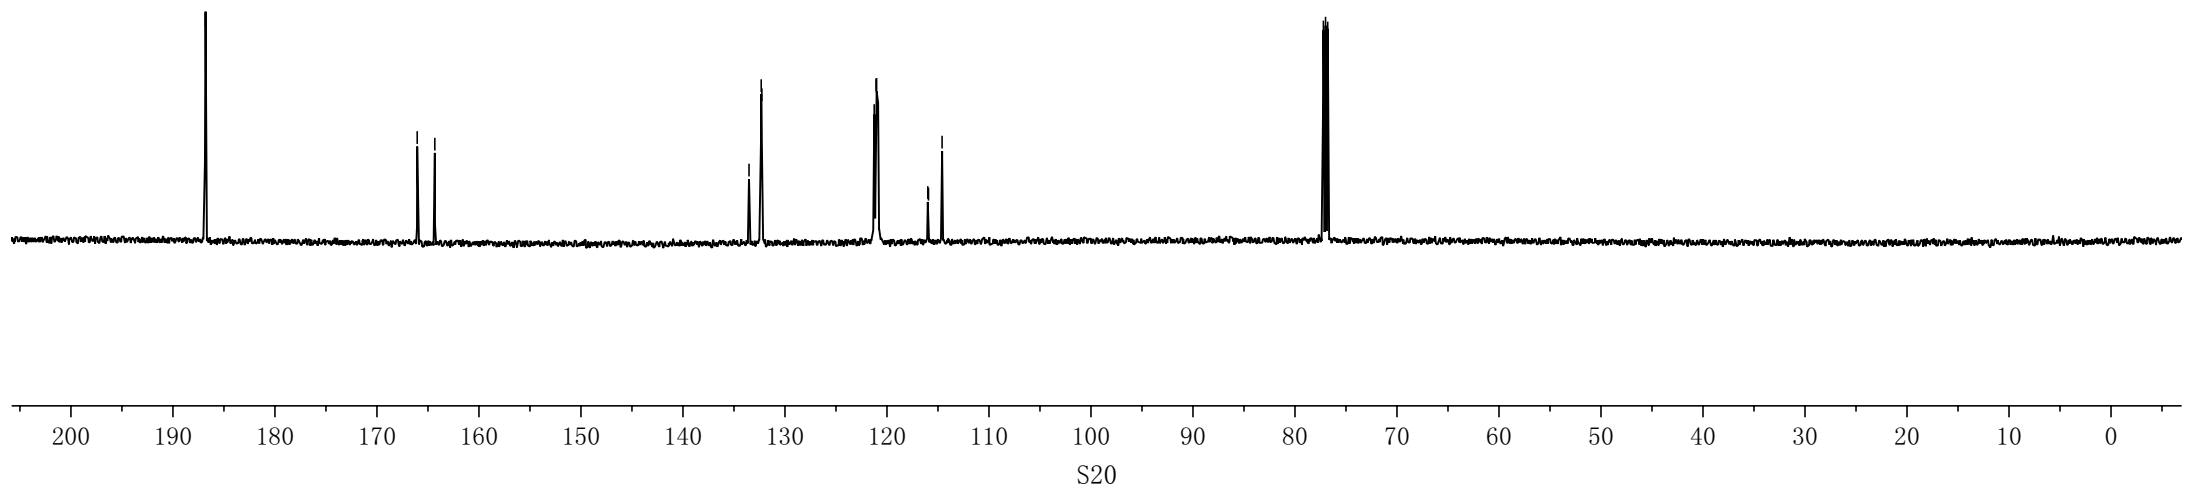

-10.231

7.863  
7.859  
7.845  
7.840  
7.835  
7.827  
7.815  
7.808  
7.796  
7.548  
7.542  
7.530  
7.527  
7.524  
7.507  
7.503  
7.260

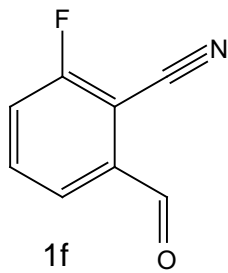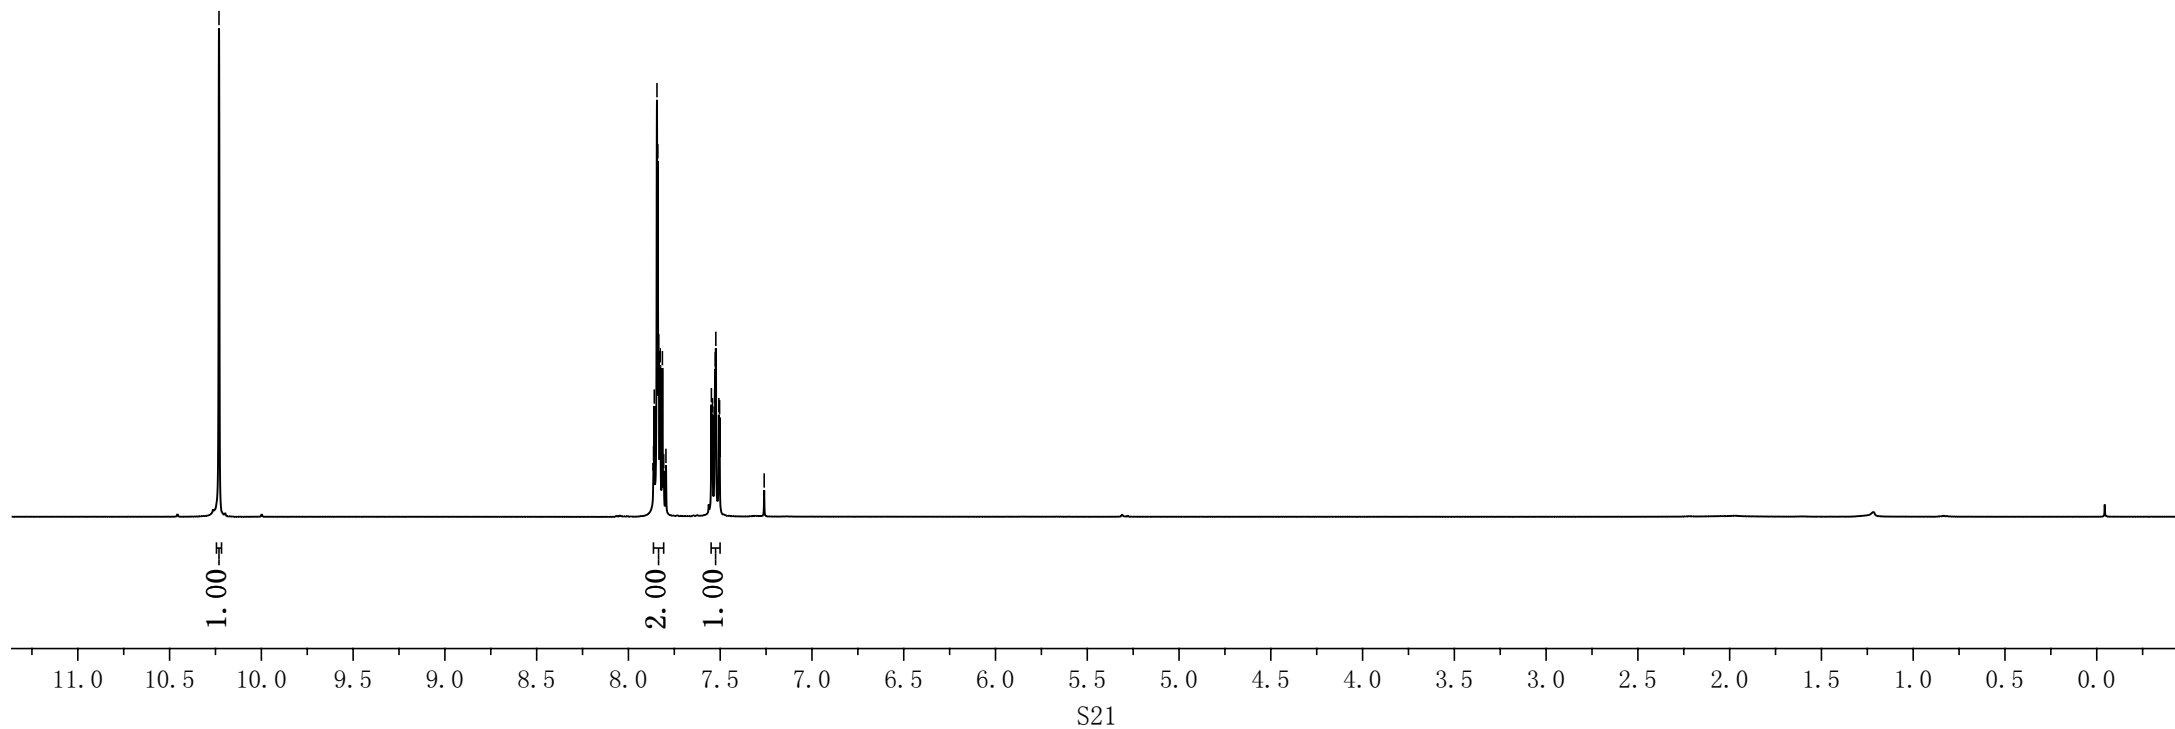

187.377  
187.347

165.320  
162.715

137.953  
135.130  
135.046

126.115  
126.083  
121.831  
121.629

110.916

101.690  
101.530

77.319  
77.000  
76.682

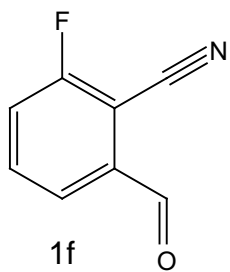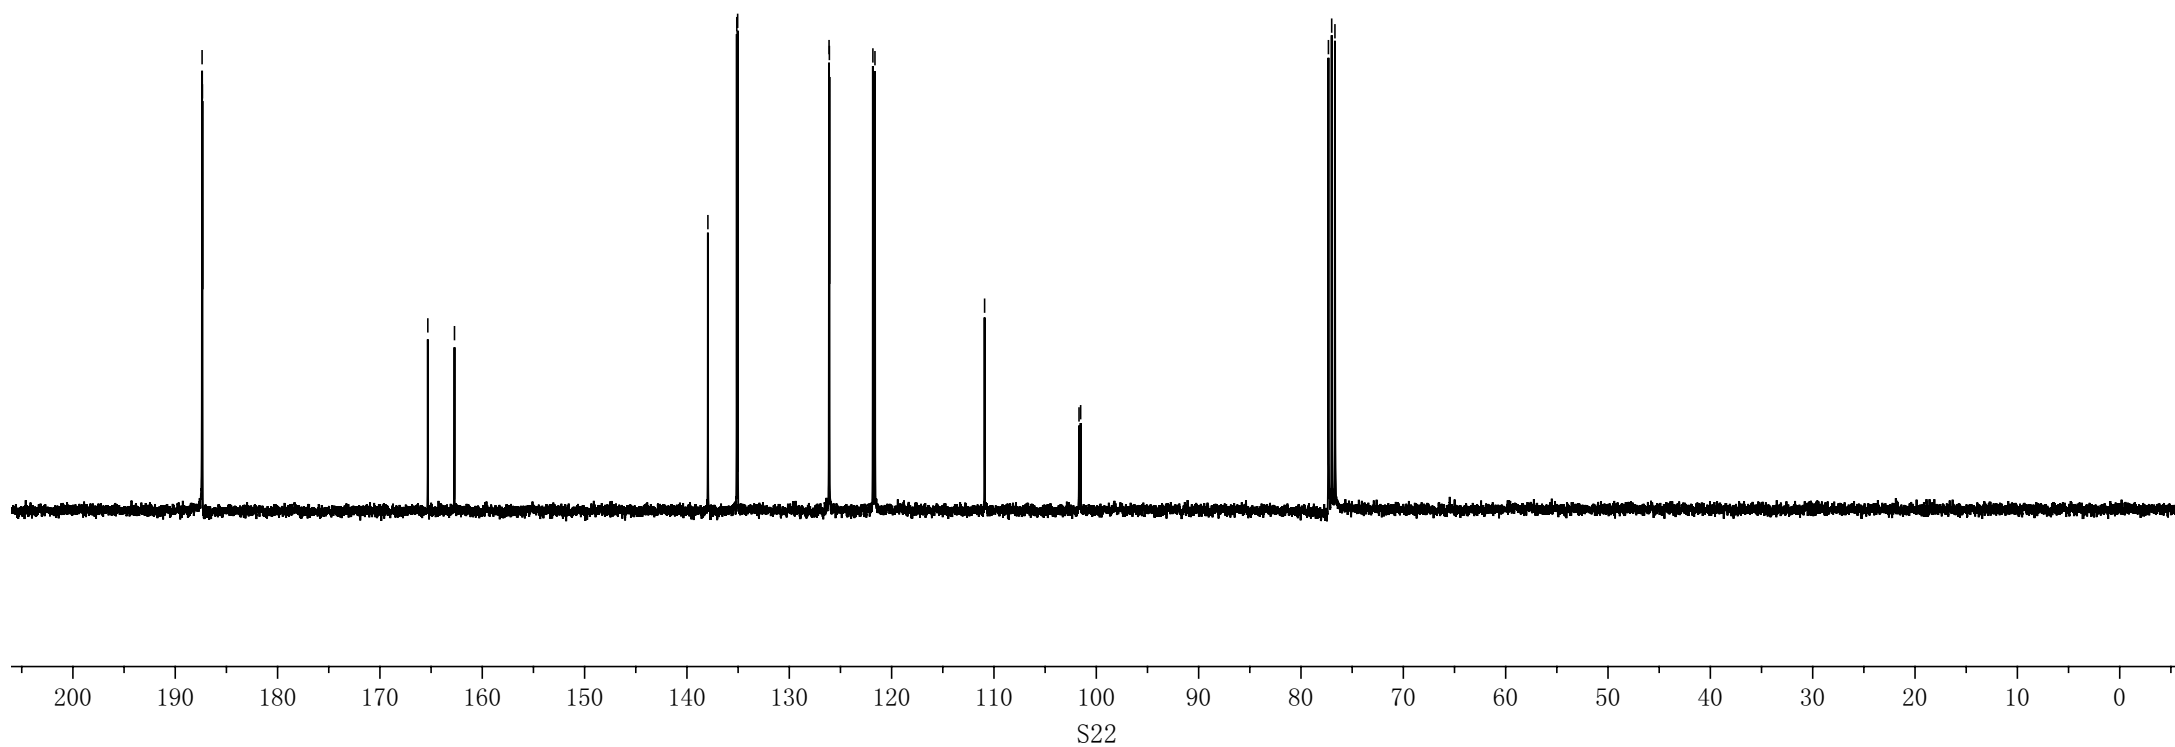

—10.189

7.879  
7.859  
7.576  
7.557  
7.537  
7.260

—2.452

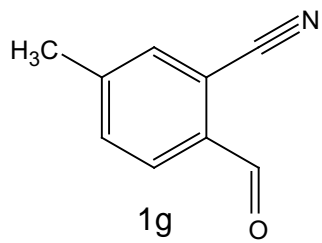

1.00

1.00

1.00

1.00

3.00

11.0 10.5 10.0 9.5 9.0 8.5 8.0 7.5 7.0 6.5 6.0 5.5 5.0 4.5 4.0 3.5 3.0 2.5 2.0 1.5 1.0 0.5 0.0

S23

—188.100

—145.693

134.361

134.306

133.842

129.699

—115.984

—113.275

77.213

77.001

76.788

—21.328

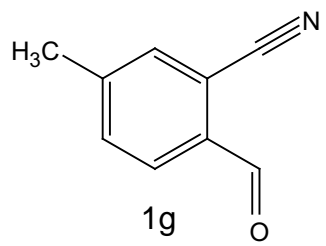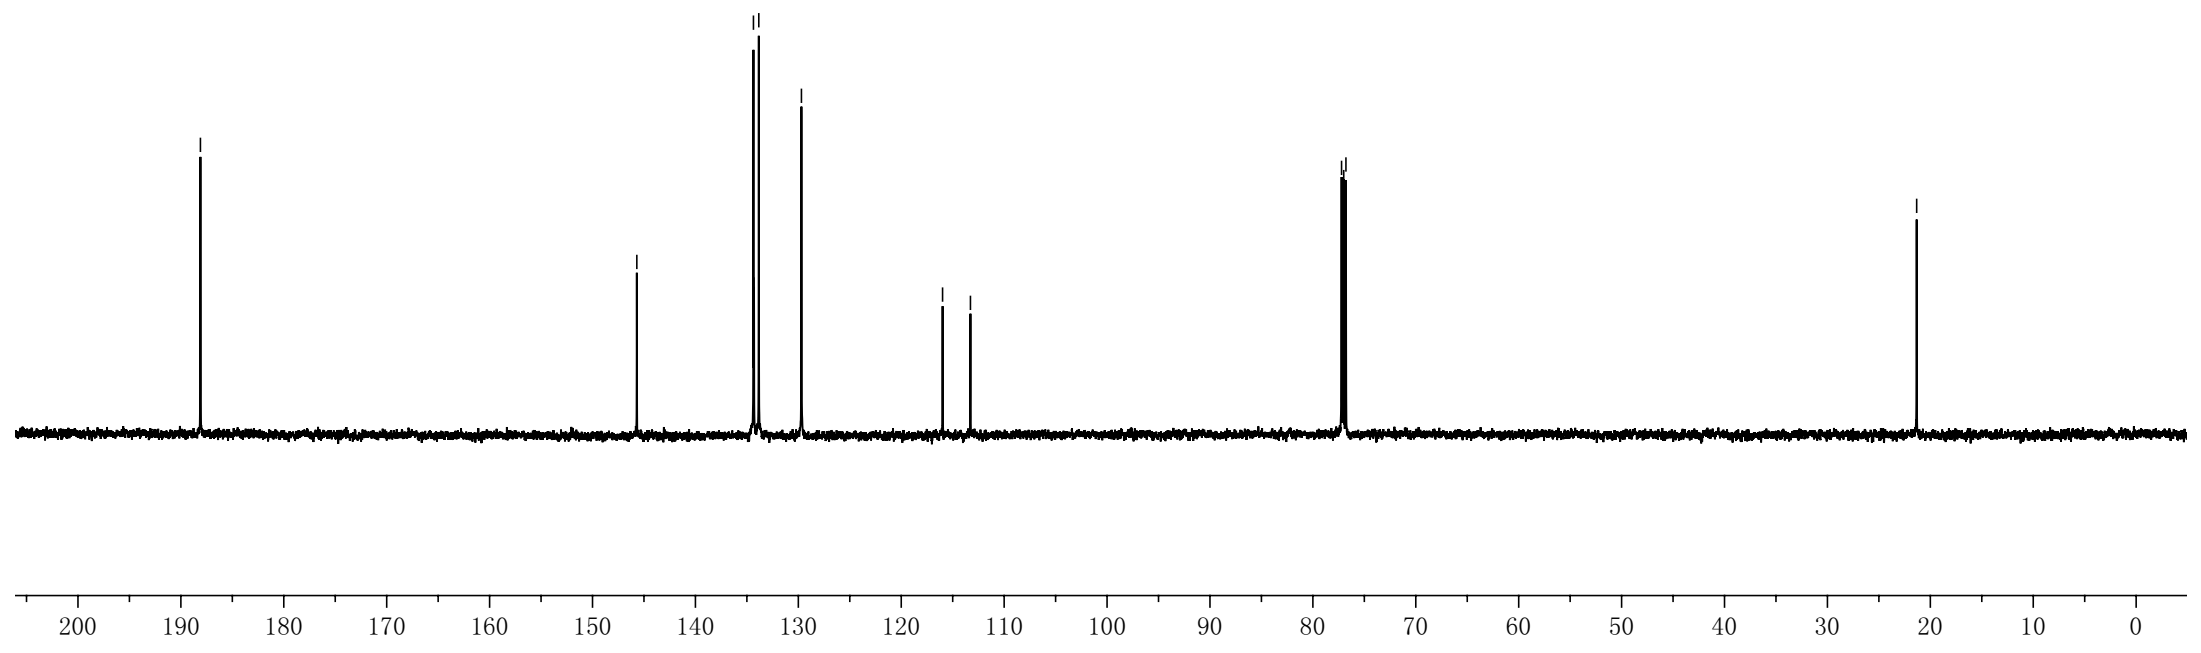



—10.057

7.895  
7.873

7.260  
7.192  
7.172  
7.166

—3.880

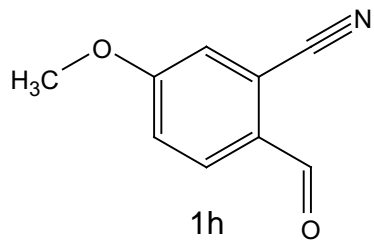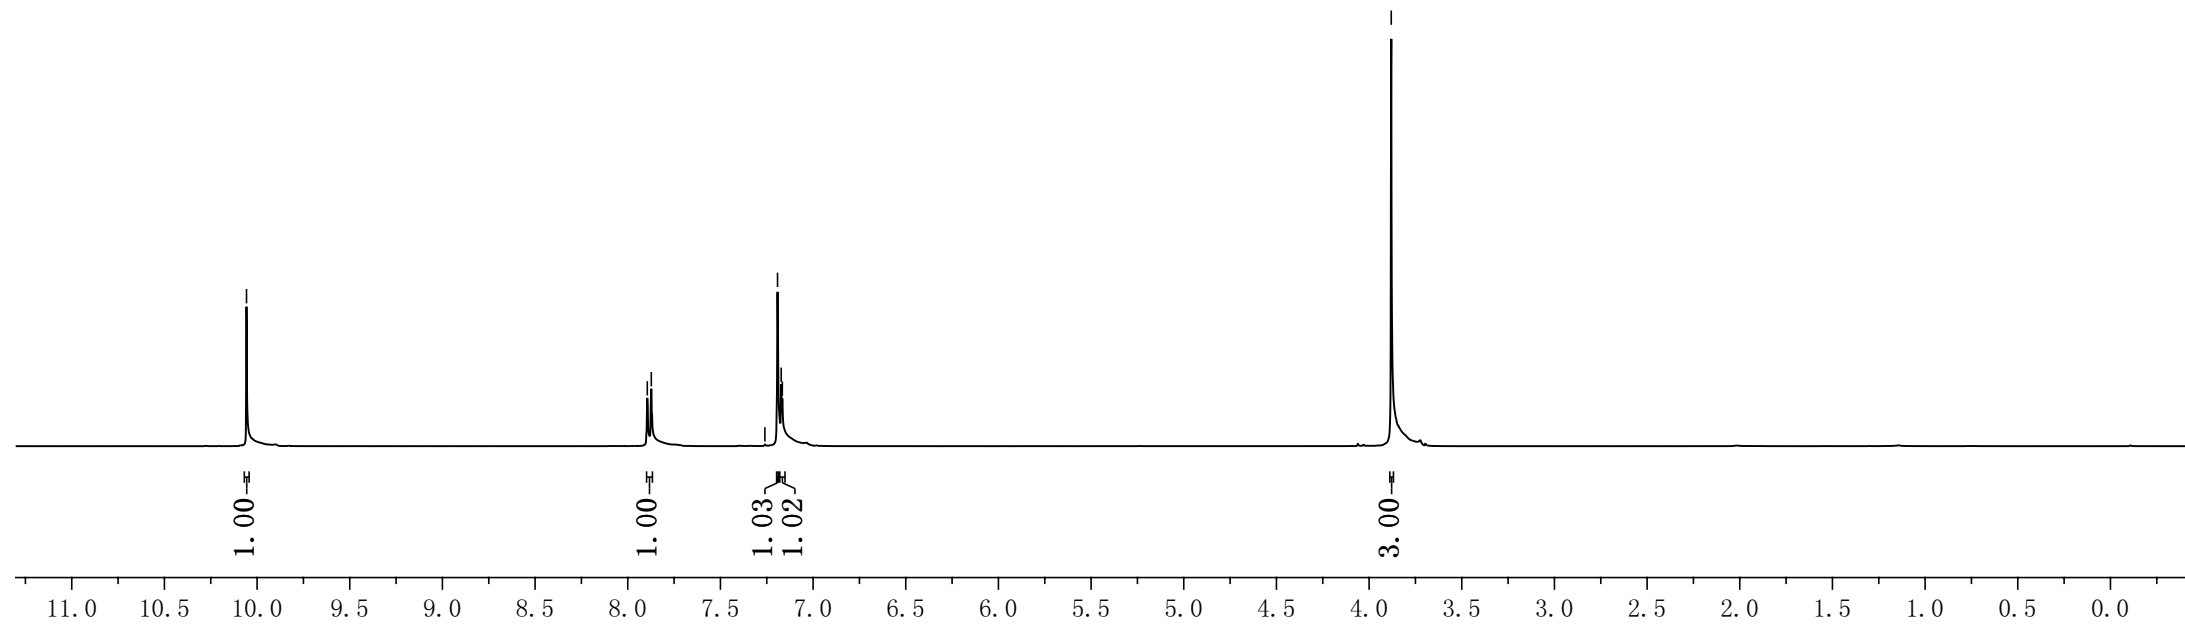

—187.159

—163.539

~131.899  
~129.595

~119.134  
~118.441  
~115.668  
~114.827

~77.319  
~77.000  
~76.680

—55.998

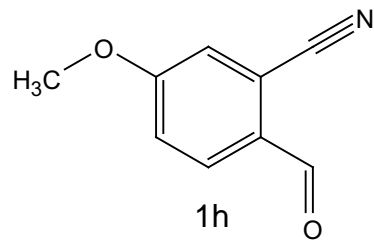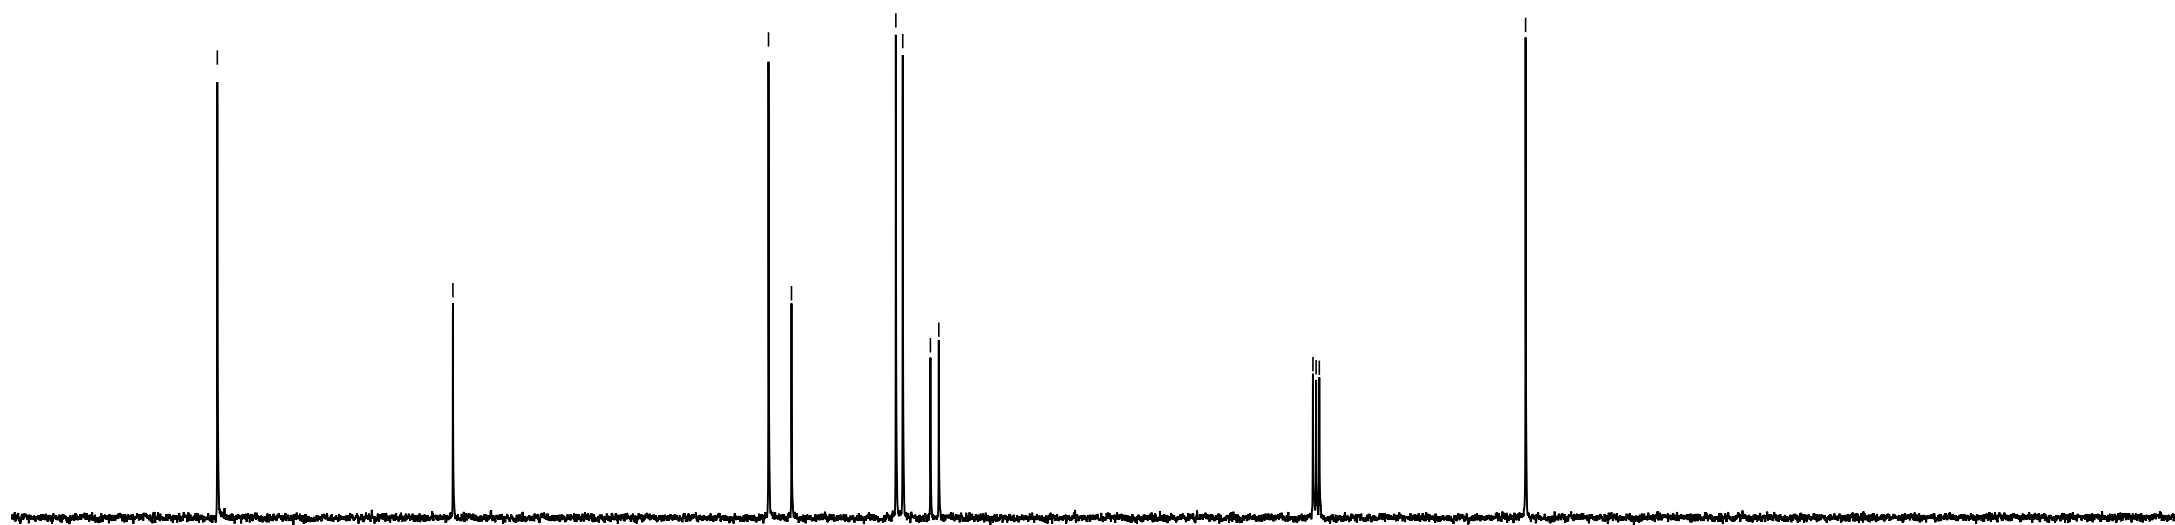

200 190 180 170 160 150 140 130 120 110 100 90 80 70 60 50 40 30 20 10 0

—10.283

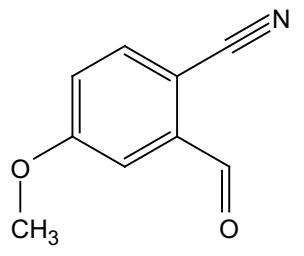

1i

7.730  
7.709  
7.475  
7.468  
7.260  
7.217  
7.210  
7.196  
7.189

—3.918

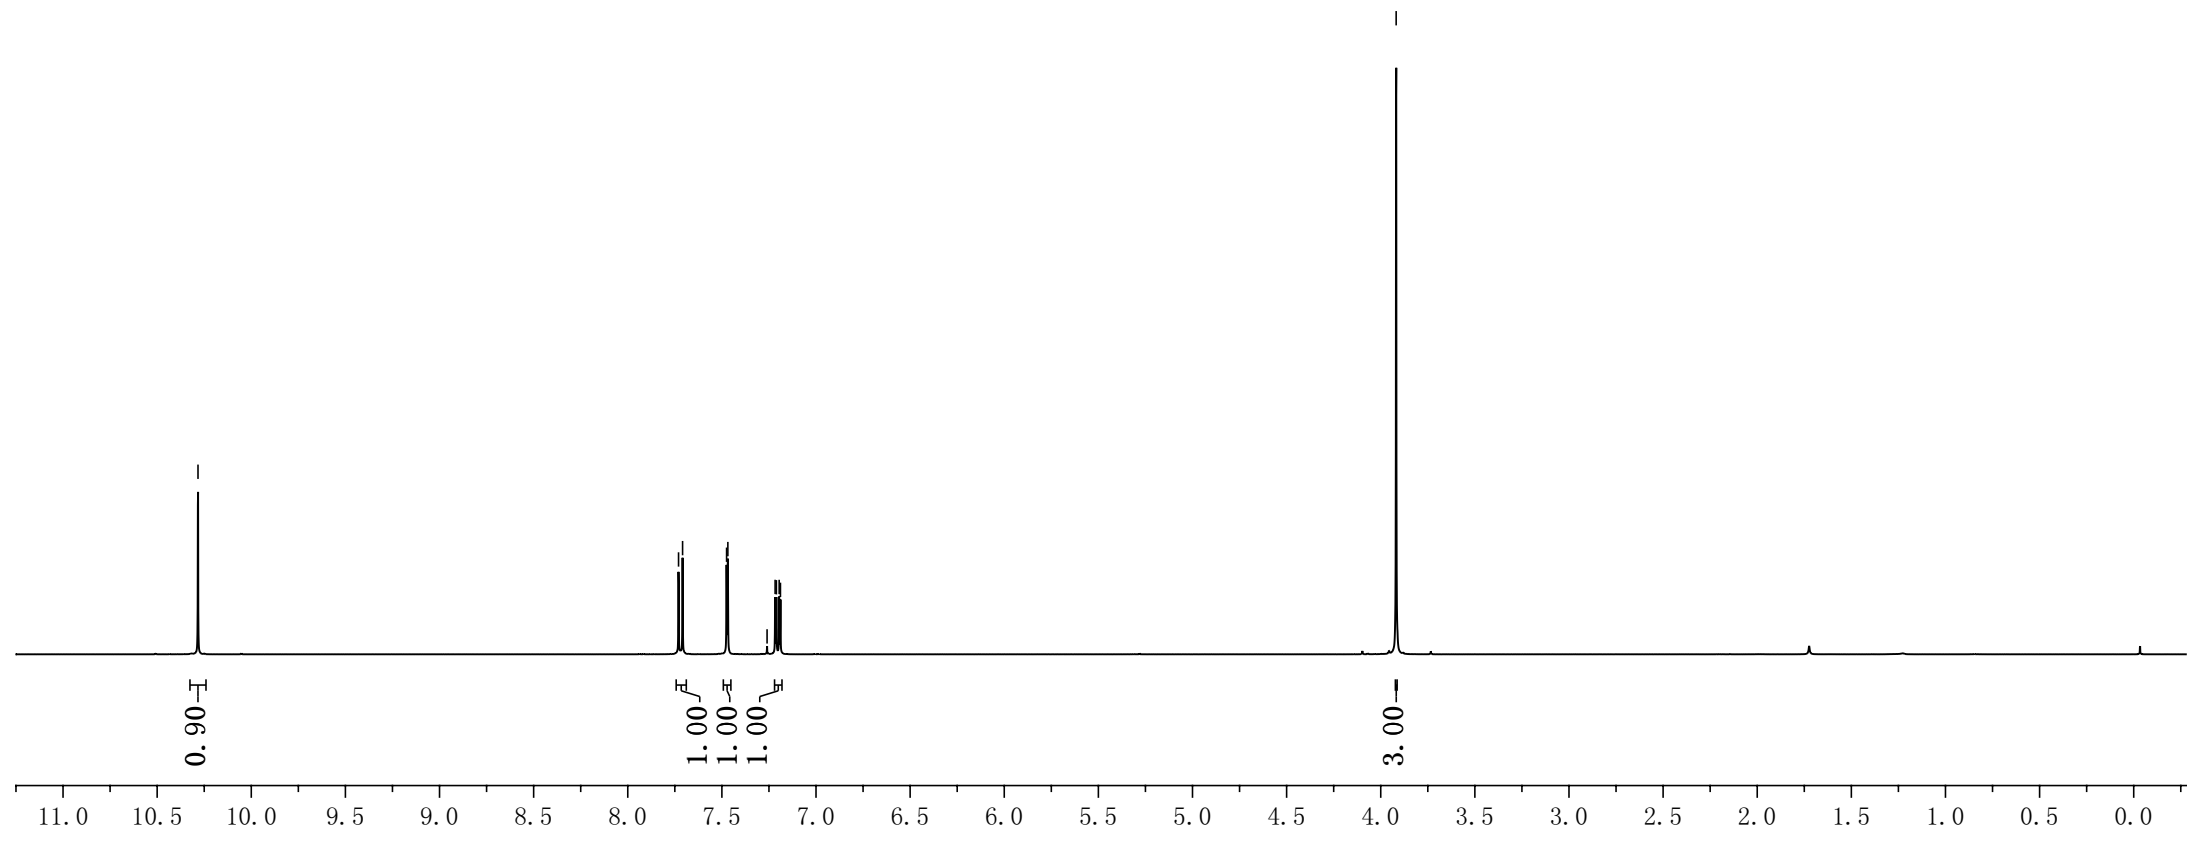

—188.396

—163.058

—138.660

—135.404

~120.706

~116.188

~113.196

—105.710

77.318

77.000

76.681

—55.978

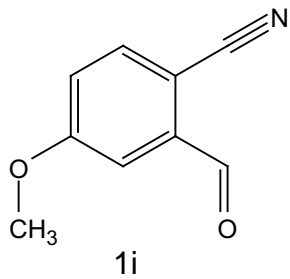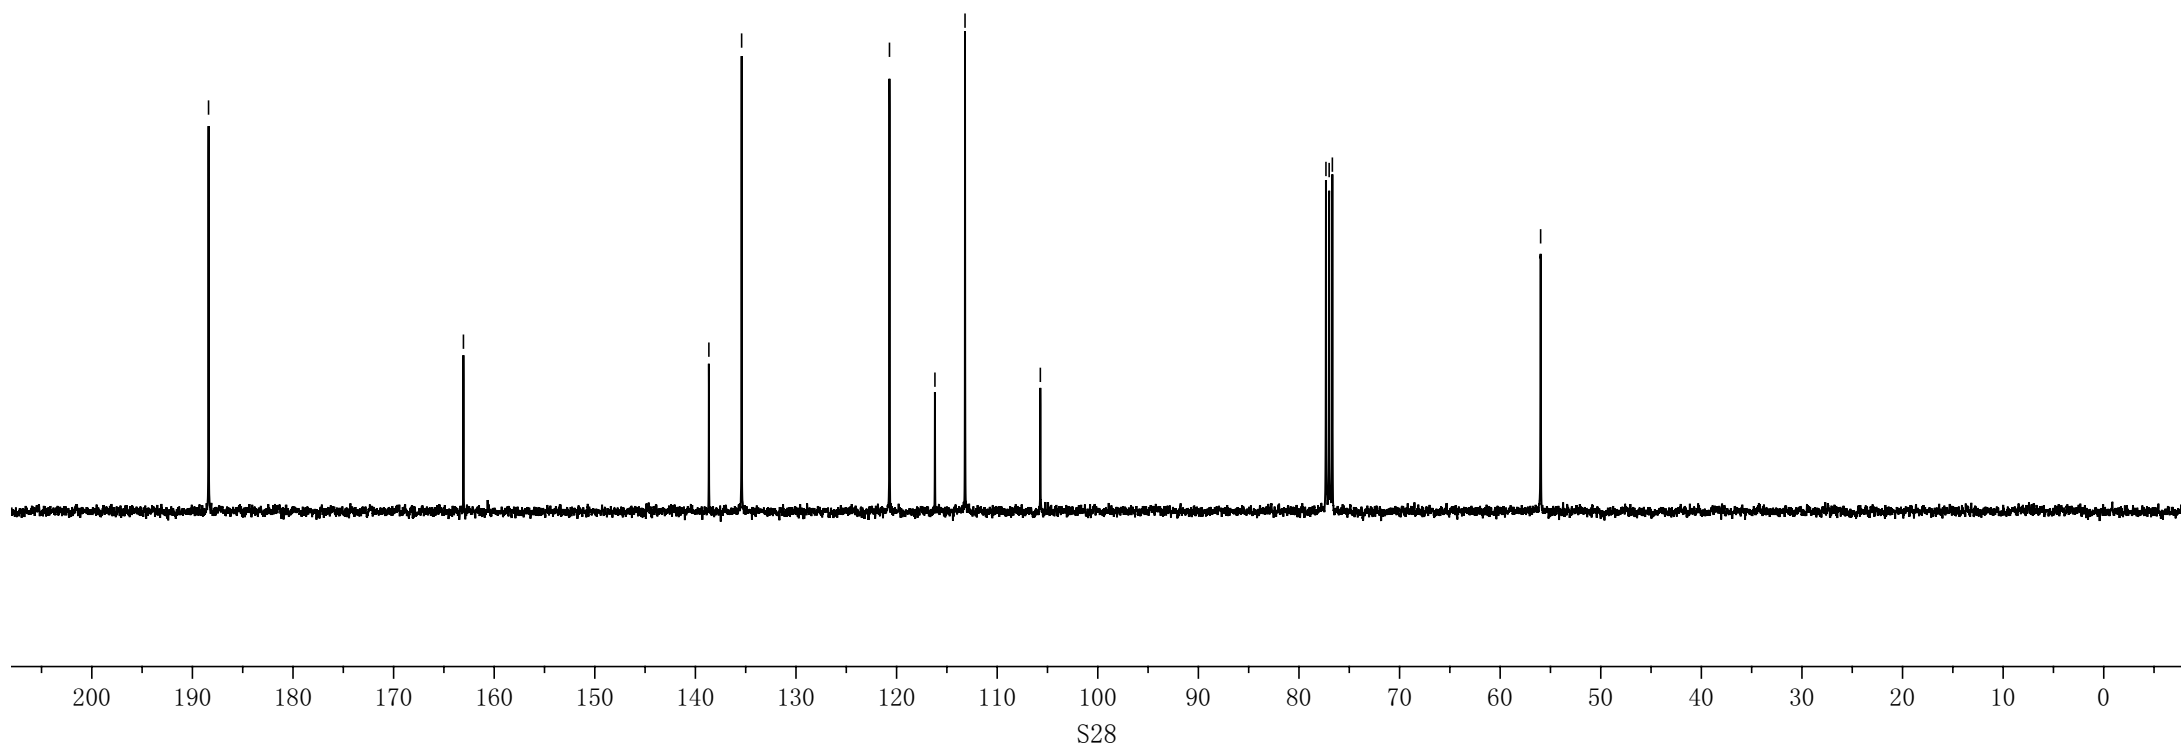

—10.282

7.757  
7.737  
7.717  
7.604  
7.602  
7.584  
7.325  
7.304

—4.033

—0.000

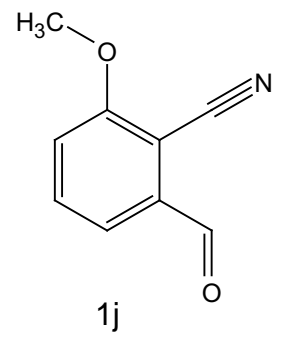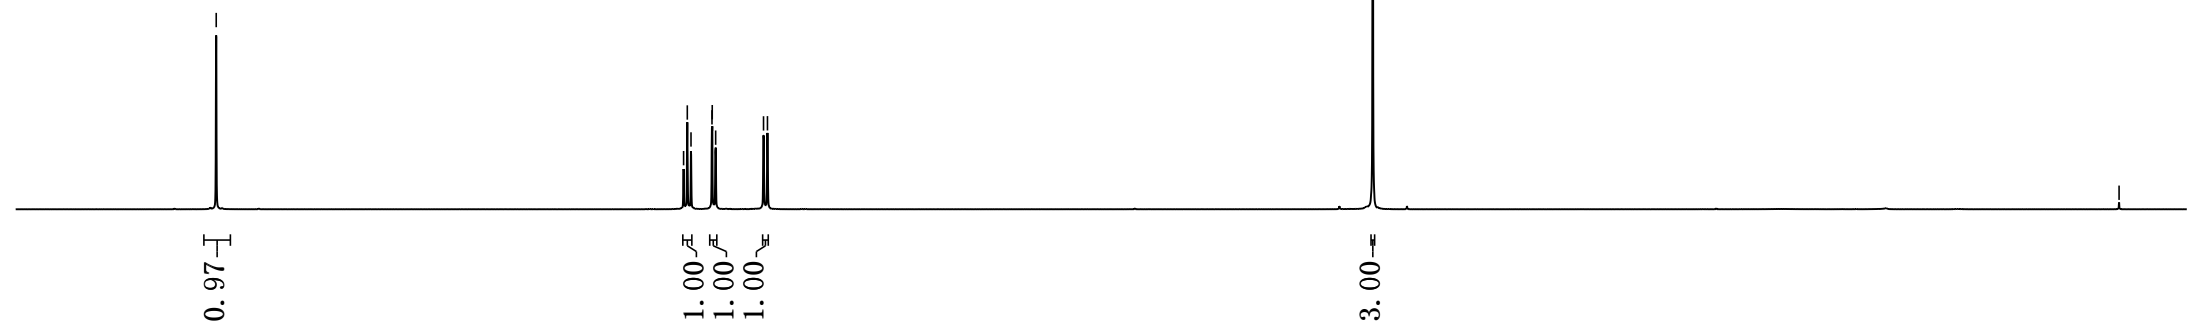

11.0 10.5 10.0 9.5 9.0 8.5 8.0 7.5 7.0 6.5 6.0 5.5 5.0 4.5 4.0 3.5 3.0 2.5 2.0 1.5 1.0 0.5 0.0

—188.683

—162.161

—137.860

—134.280

~121.154

~116.576

~113.215

—102.410

77.317

77.000

76.680

—56.587

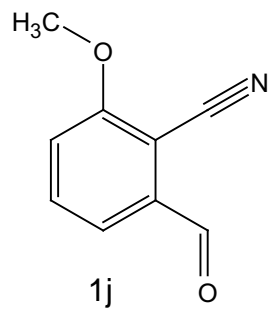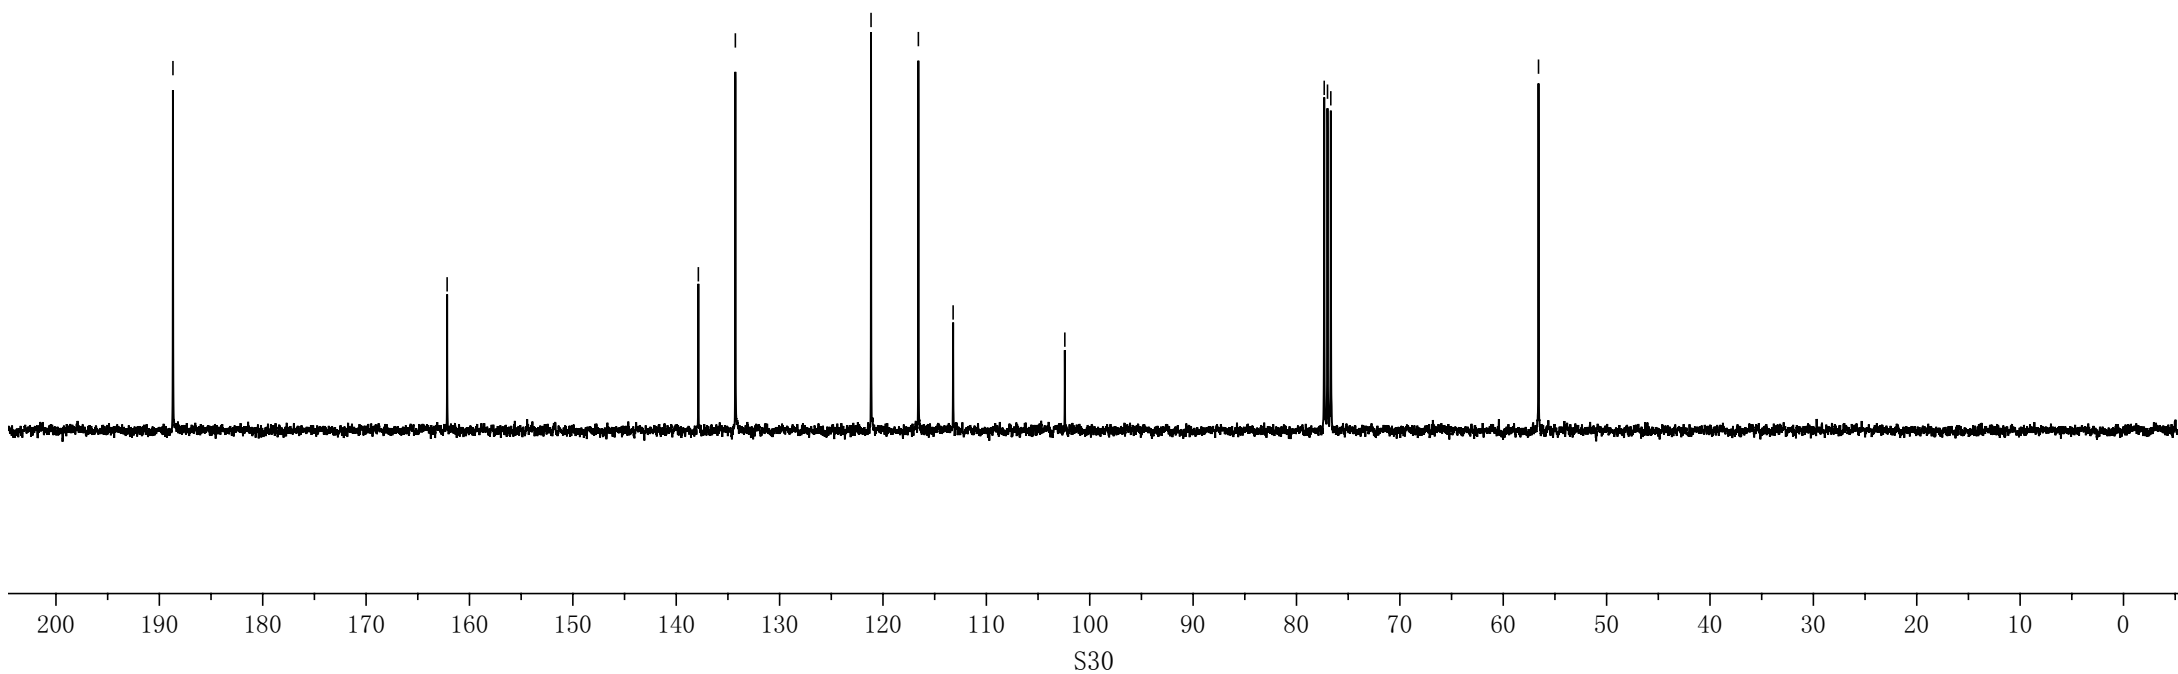

—10.225

~7.459  
~7.260  
~7.166

<3.982  
<3.976

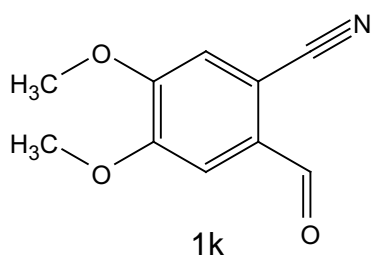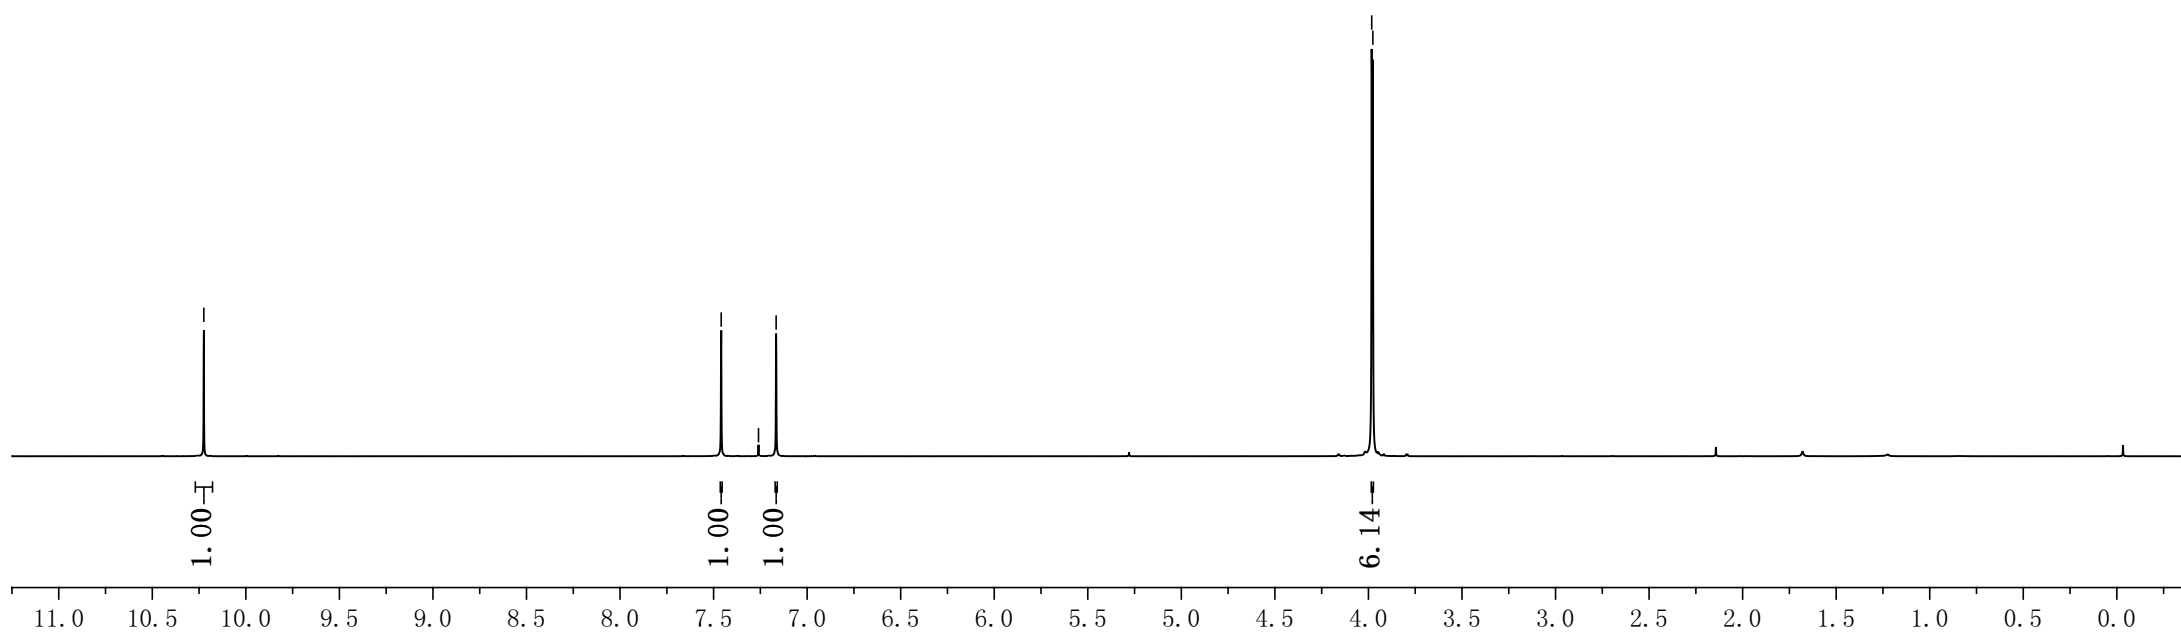

S31

—187.424

153.625  
152.811

—131.686

115.952  
114.392  
109.393  
108.120

77.319  
77.000  
76.682

56.613  
56.399

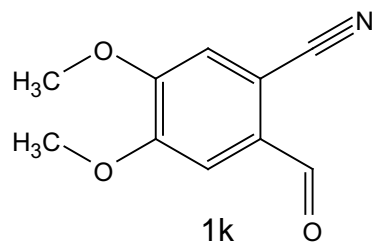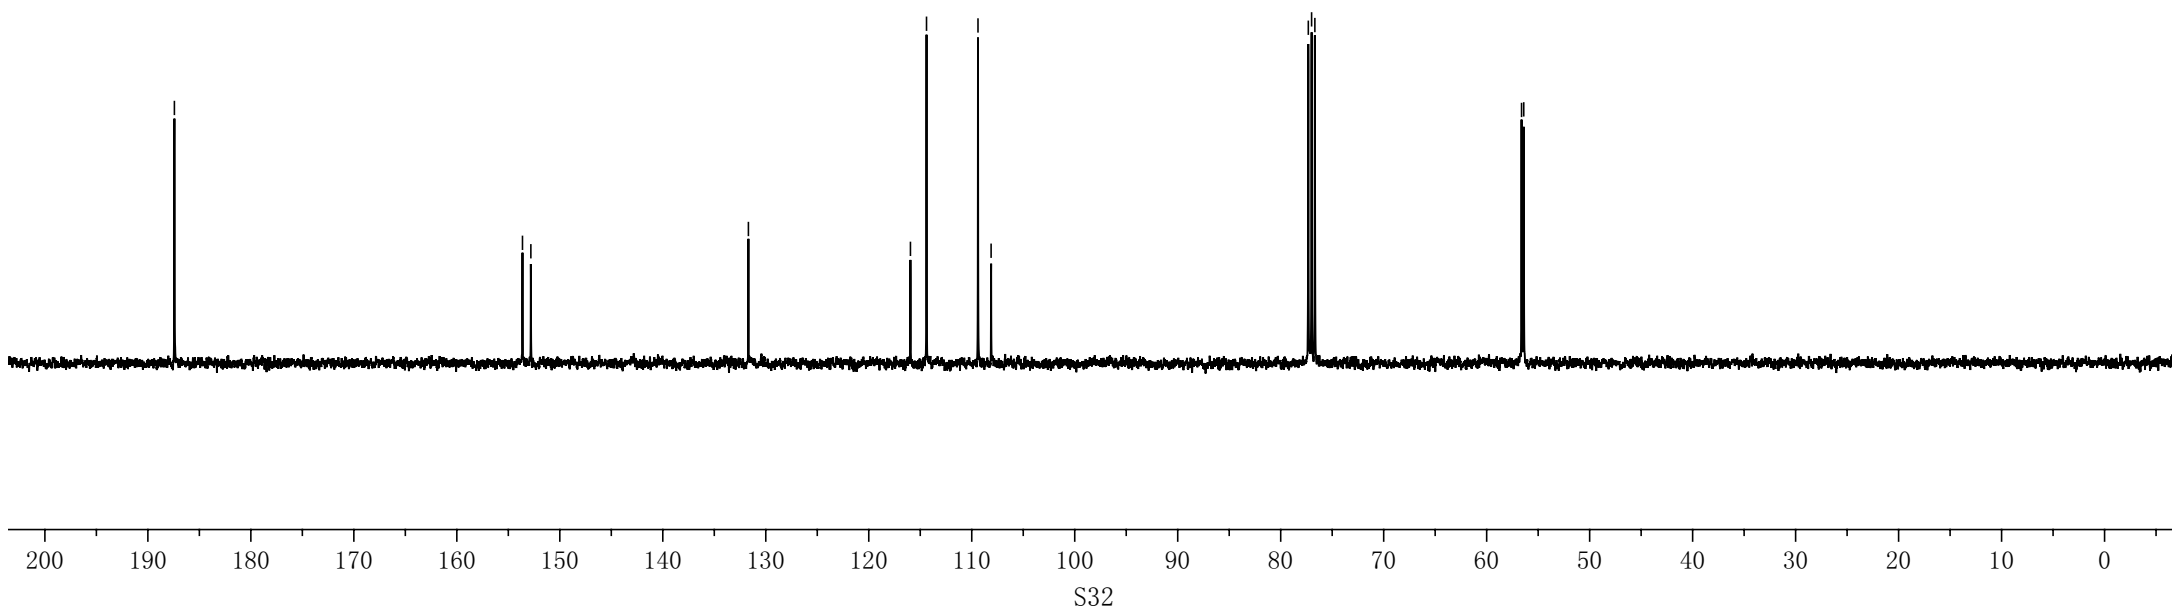



—10.226

~7.428  
~7.260  
~7.148

—6.194

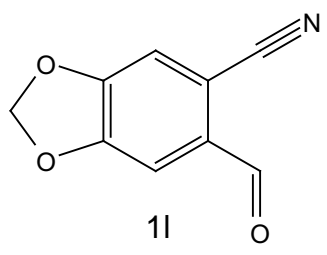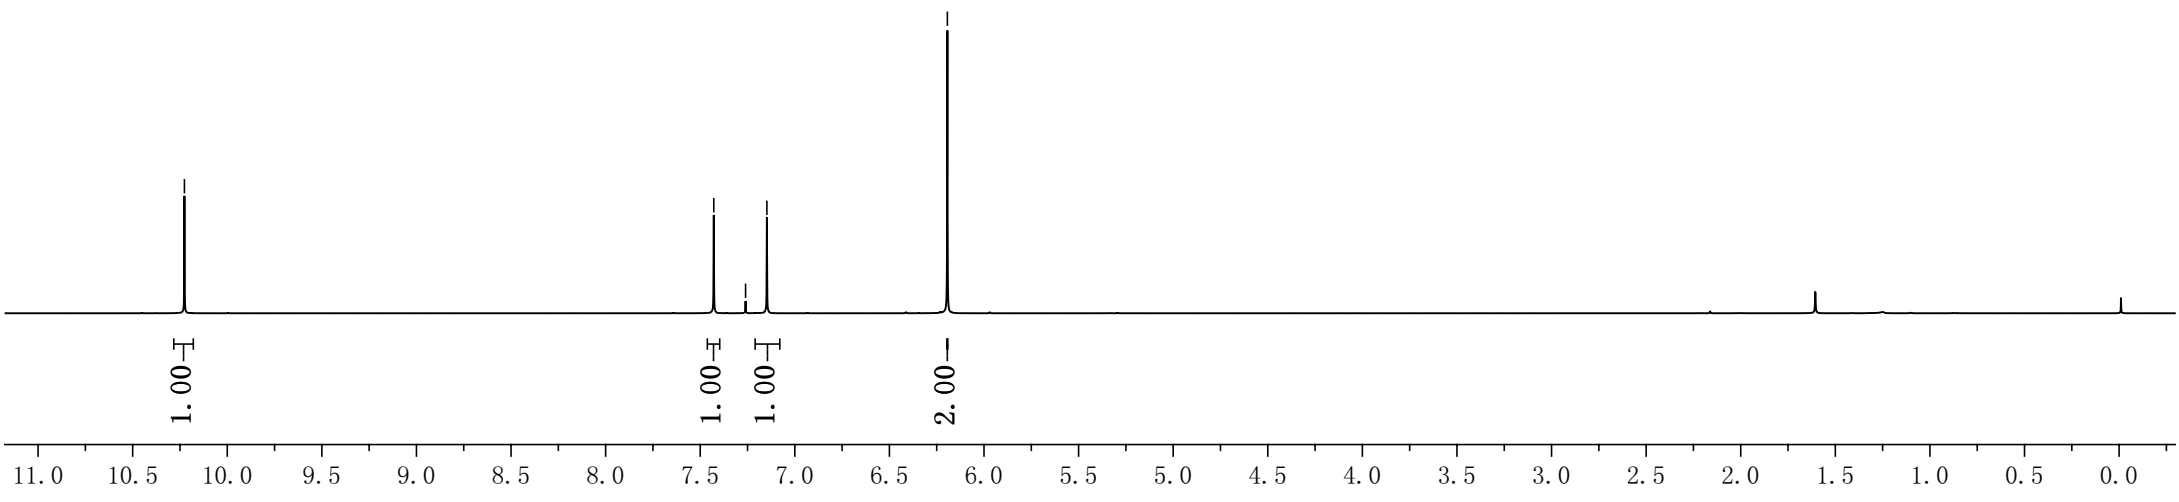

—186.901

—152.537  
—152.109

—134.216

—115.659  
—112.218  
—110.148  
—107.575  
—103.472

77.318  
77.000  
76.682

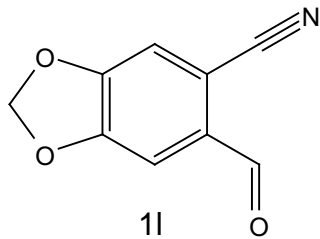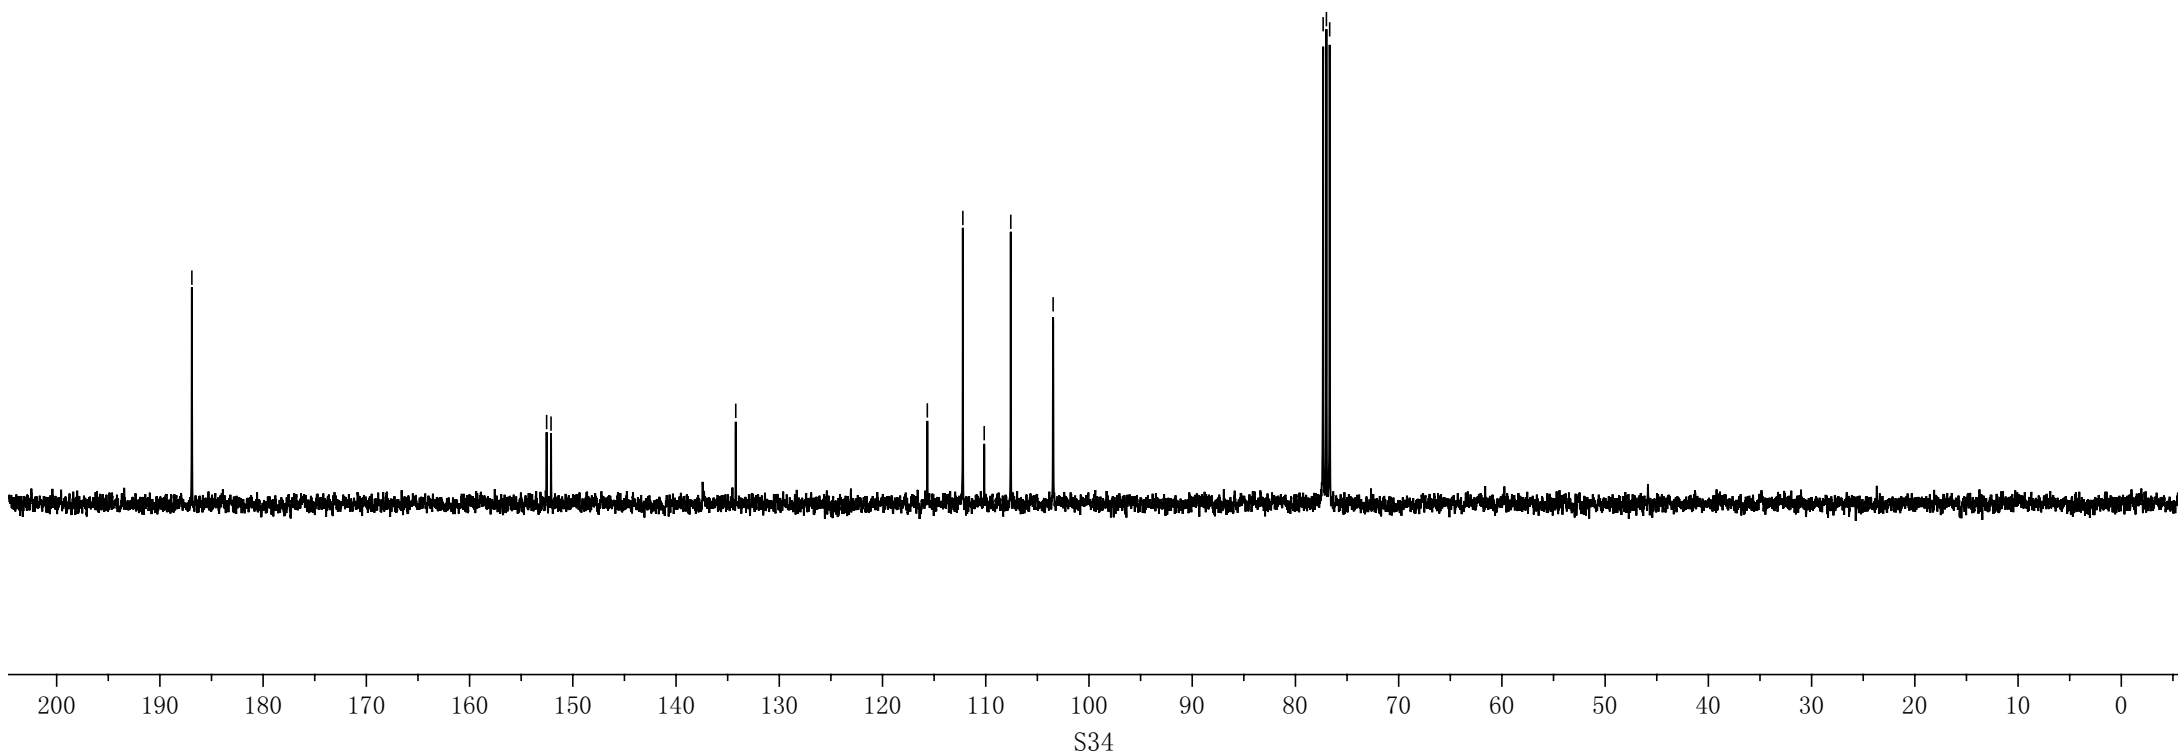

10.327  
8.095  
8.075  
8.002  
7.997  
7.973  
7.968  
7.952  
7.948  
7.622  
7.618  
7.613  
7.606  
7.601  
7.598  
7.591  
7.532  
7.527  
7.522  
7.516  
7.511  
7.506  
7.496  
7.492  
7.485  
7.481  
7.475  
7.468  
7.449  
7.260

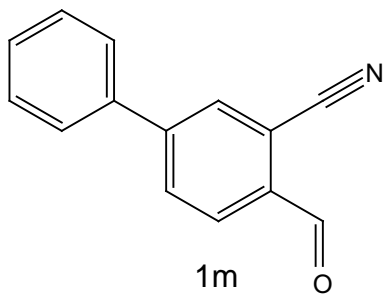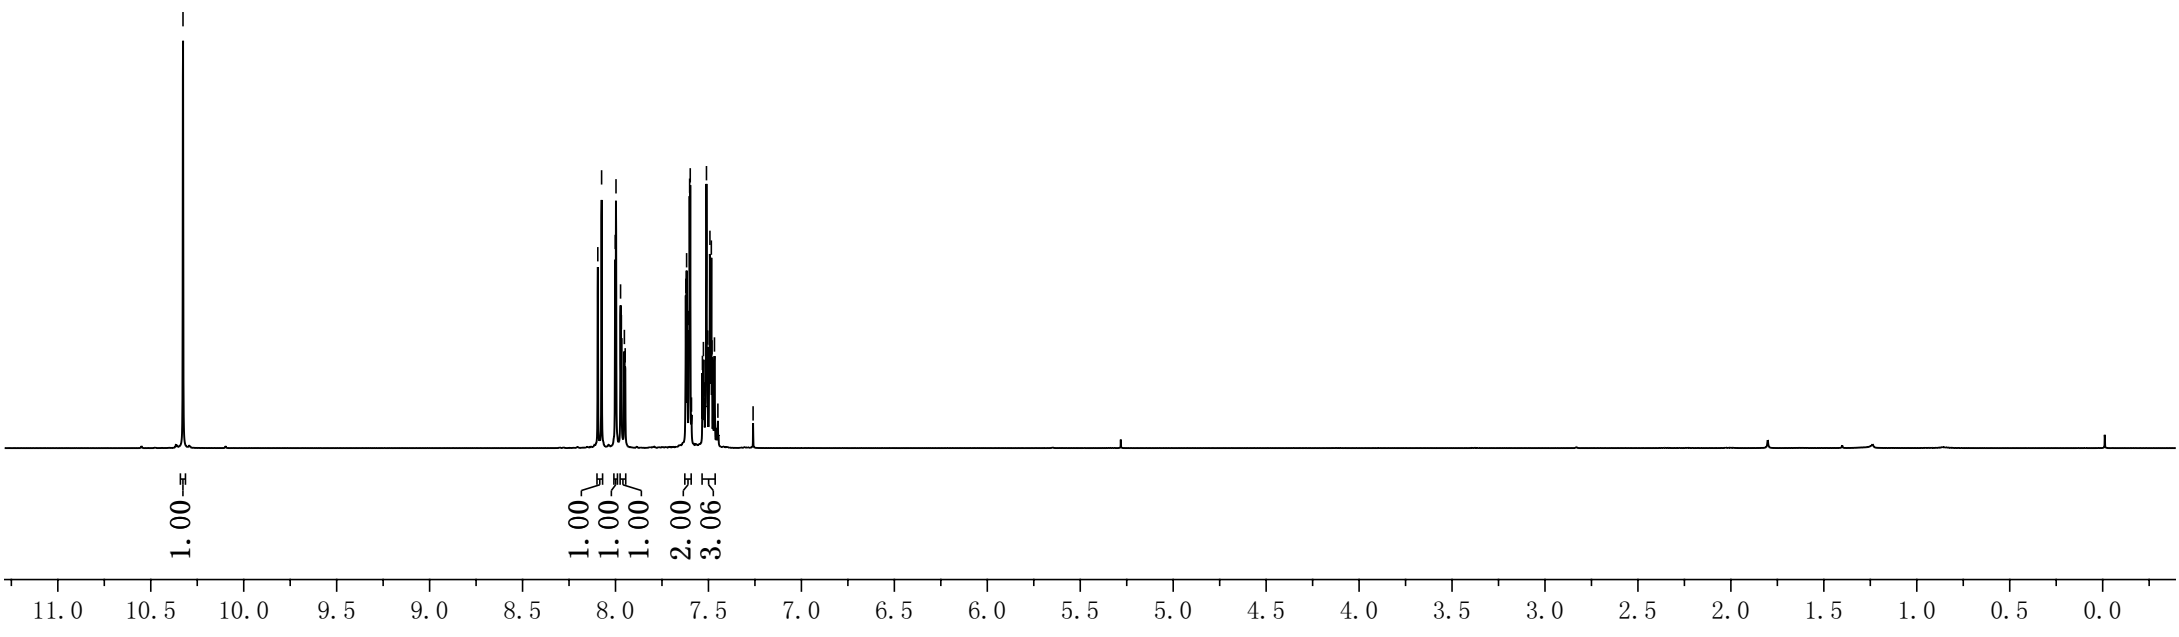

—188.051

—146.979

└─137.084

└─134.880

└─132.265

└─131.302

└─130.170

└─129.353

└─129.177

└─127.043

└─115.945

└─113.924

└─77.320

└─77.000

└─76.682

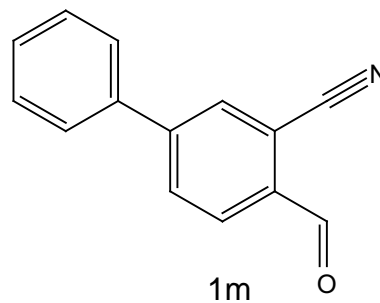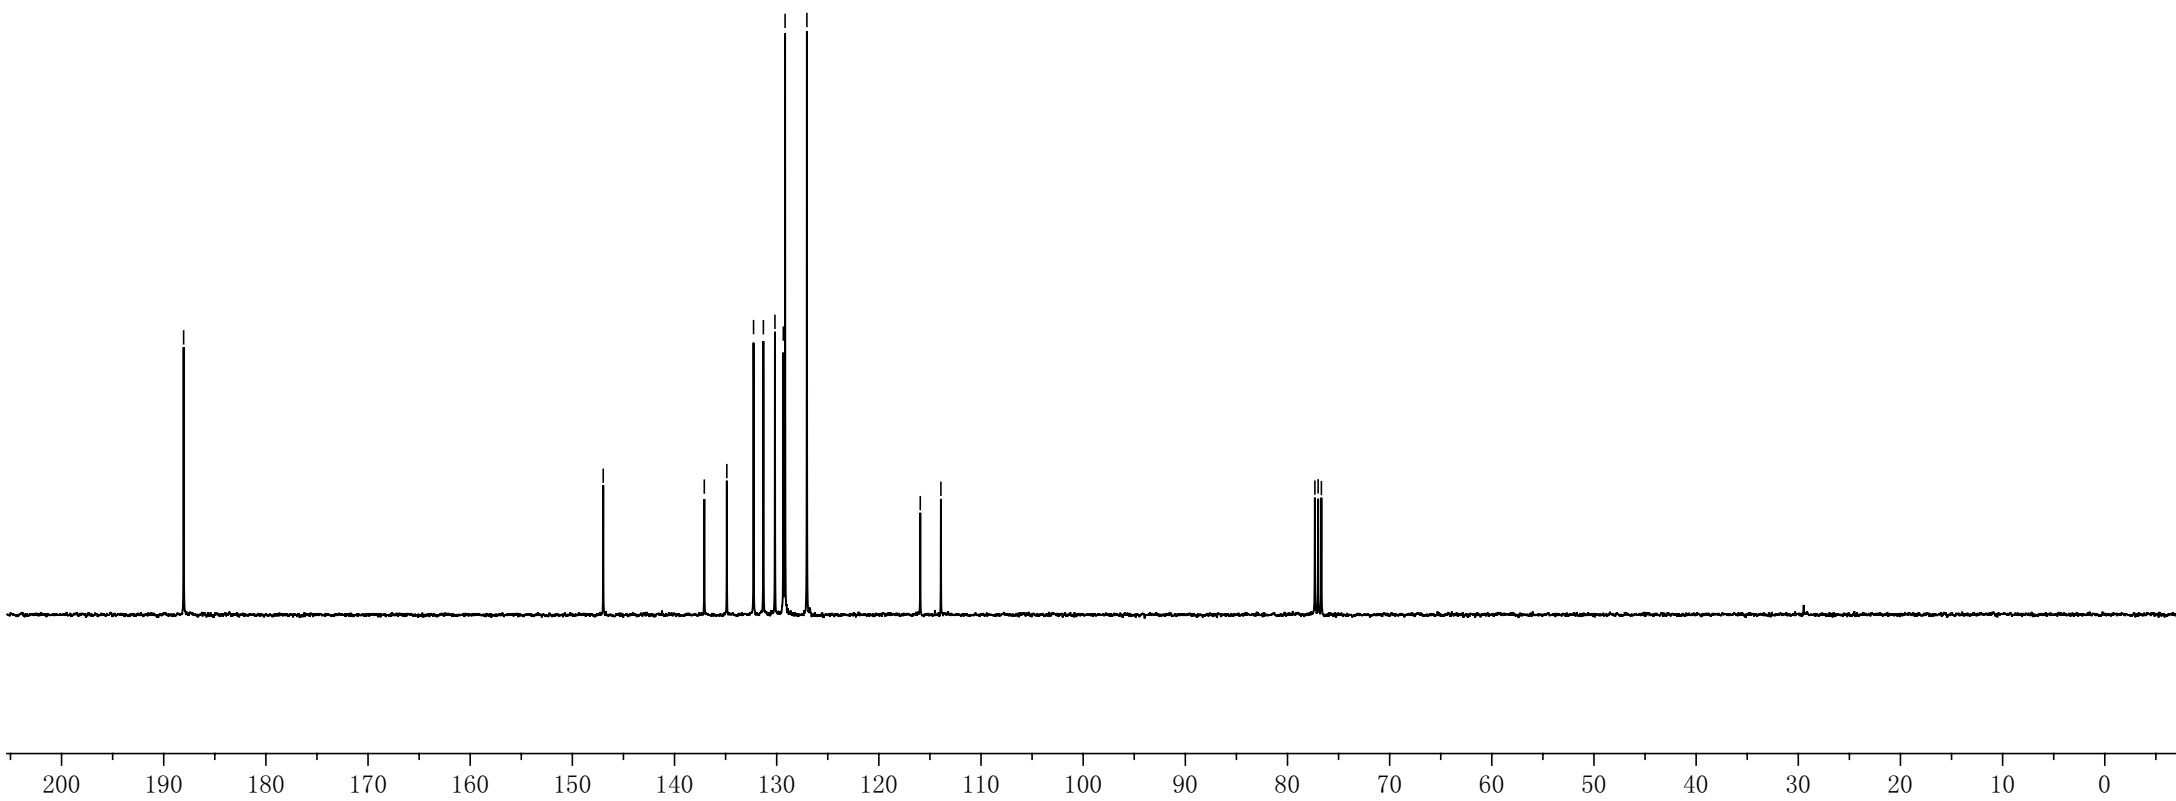

10.396

8.158  
8.154  
8.132  
8.106  
8.102  
8.086  
8.082  
8.003  
7.981  
7.956  
7.948  
7.941  
7.932  
7.918  
7.909  
7.902  
7.894  
7.736  
7.731  
7.715  
7.710  
7.589  
7.580  
7.573  
7.565  
7.260

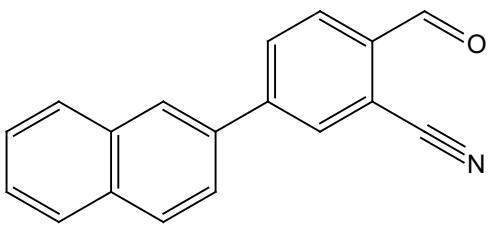

1n

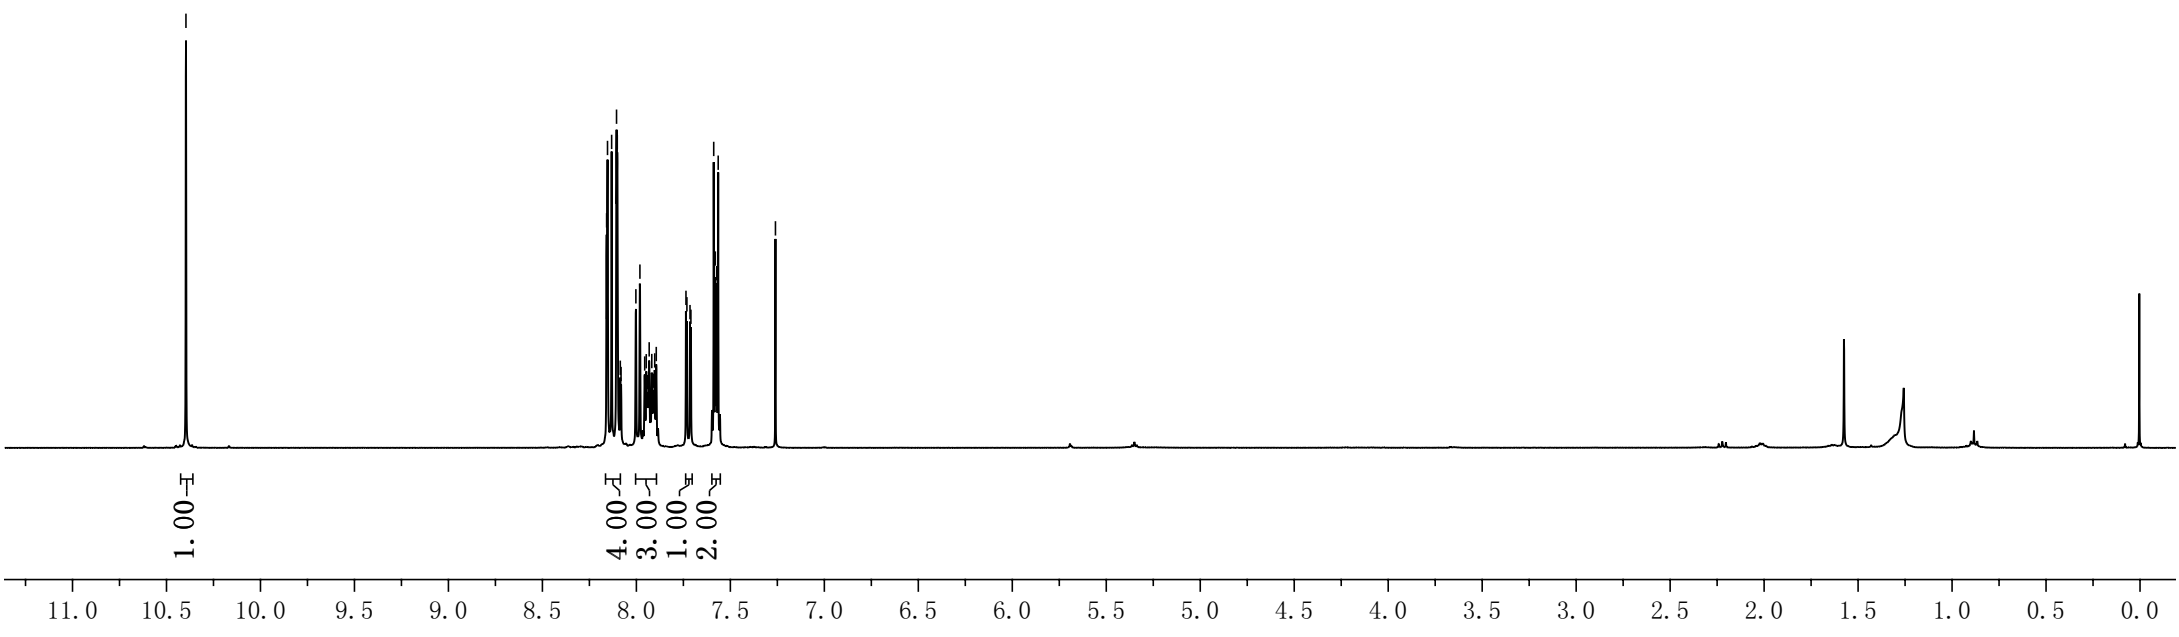

—188.175

—147.308

131.707

130.106

129.350

128.510

127.769

127.058

127.019

124.380

116.058

114.588

77.318

77.000

76.682

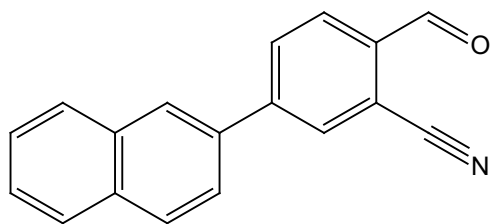

1n

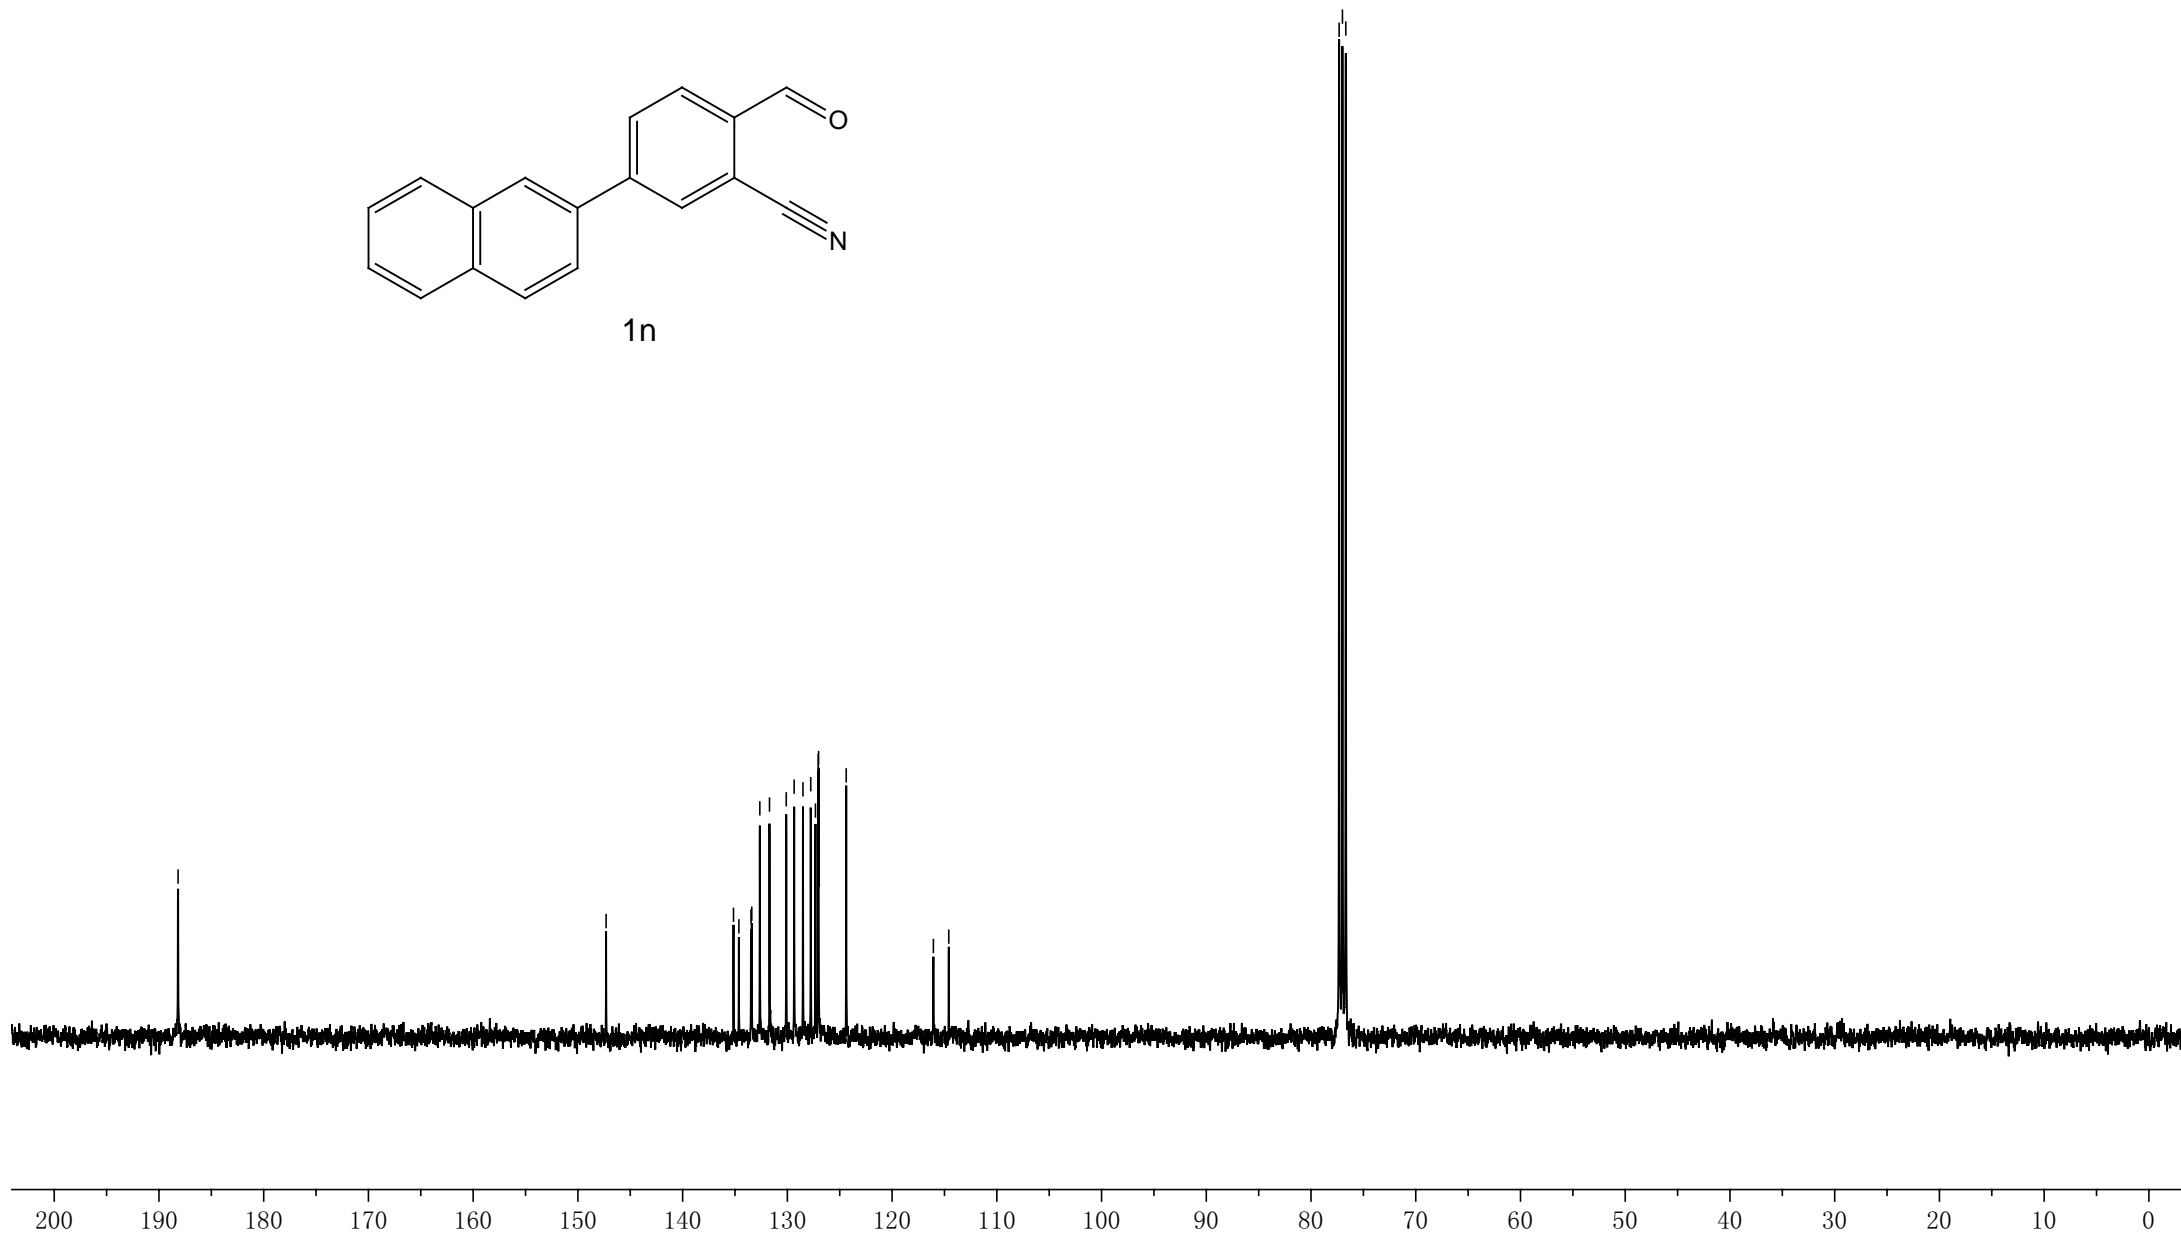

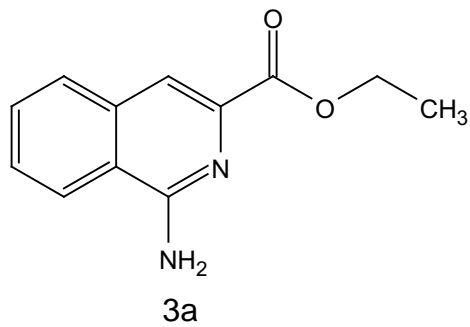

7.933  
7.876  
7.855  
7.821  
7.801  
7.665  
7.663  
7.603  
7.600  
7.583

5.882

4.482  
4.465  
4.447  
4.429

1.452  
1.434  
1.416

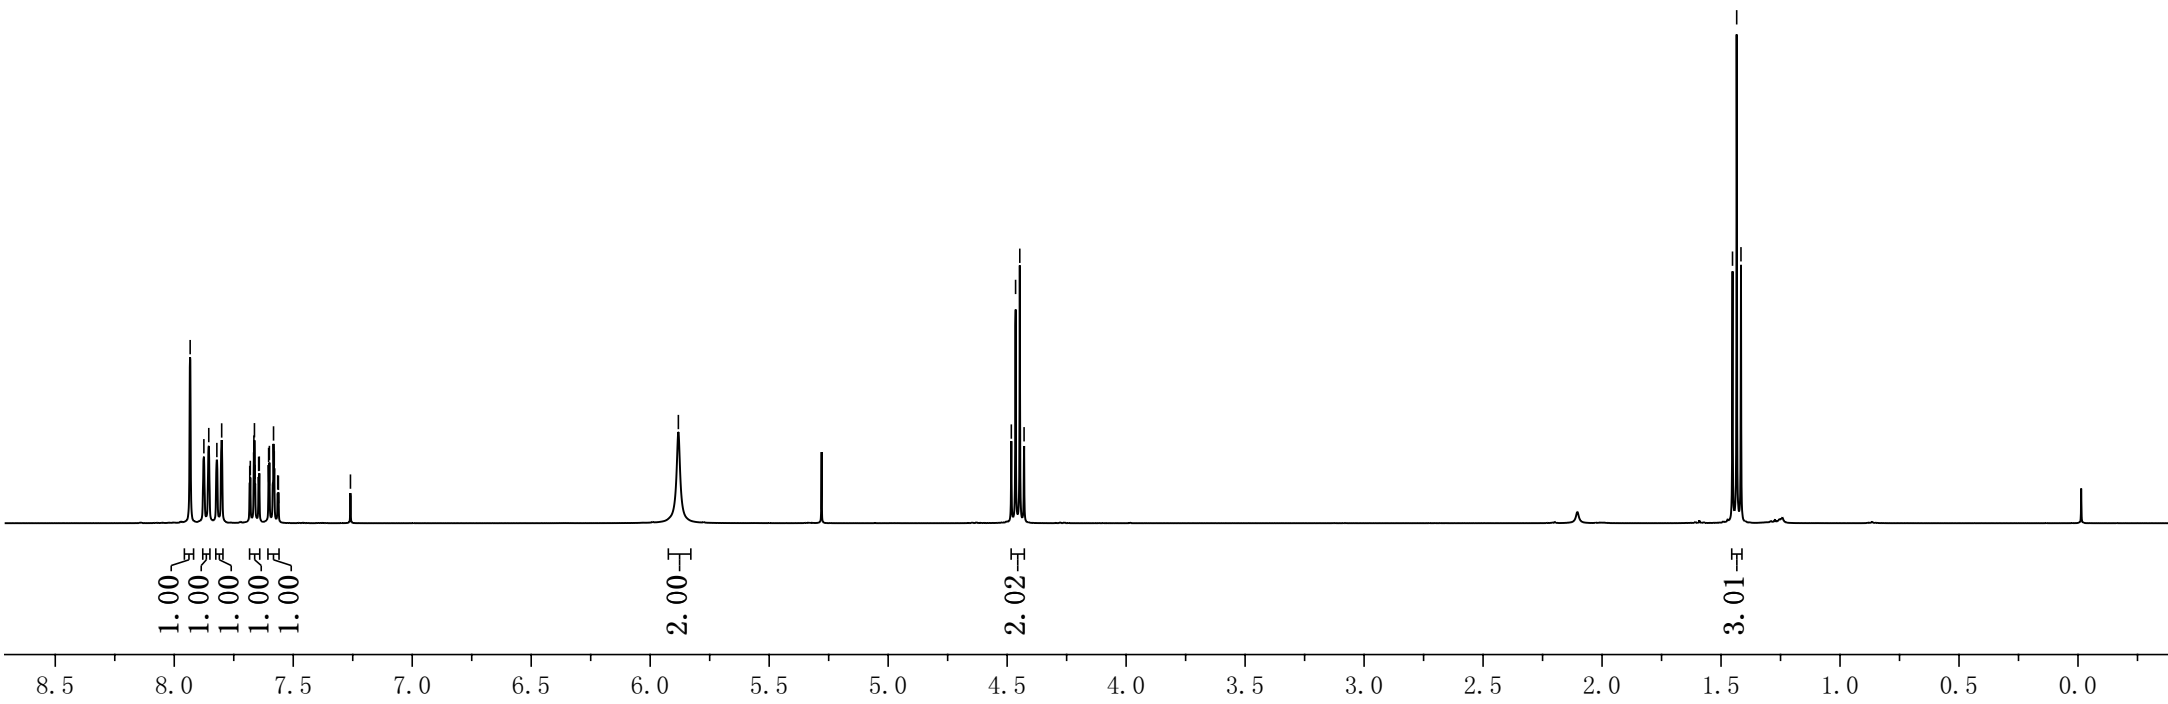

—166.088

—156.491

—140.048

—136.769

~130.595

~128.554

~128.272

~122.754

~119.406

~115.782

77.318

77.000

76.682

—61.401

—14.390

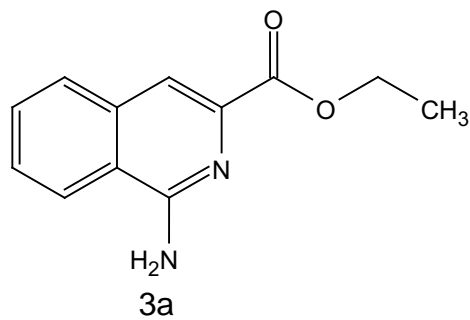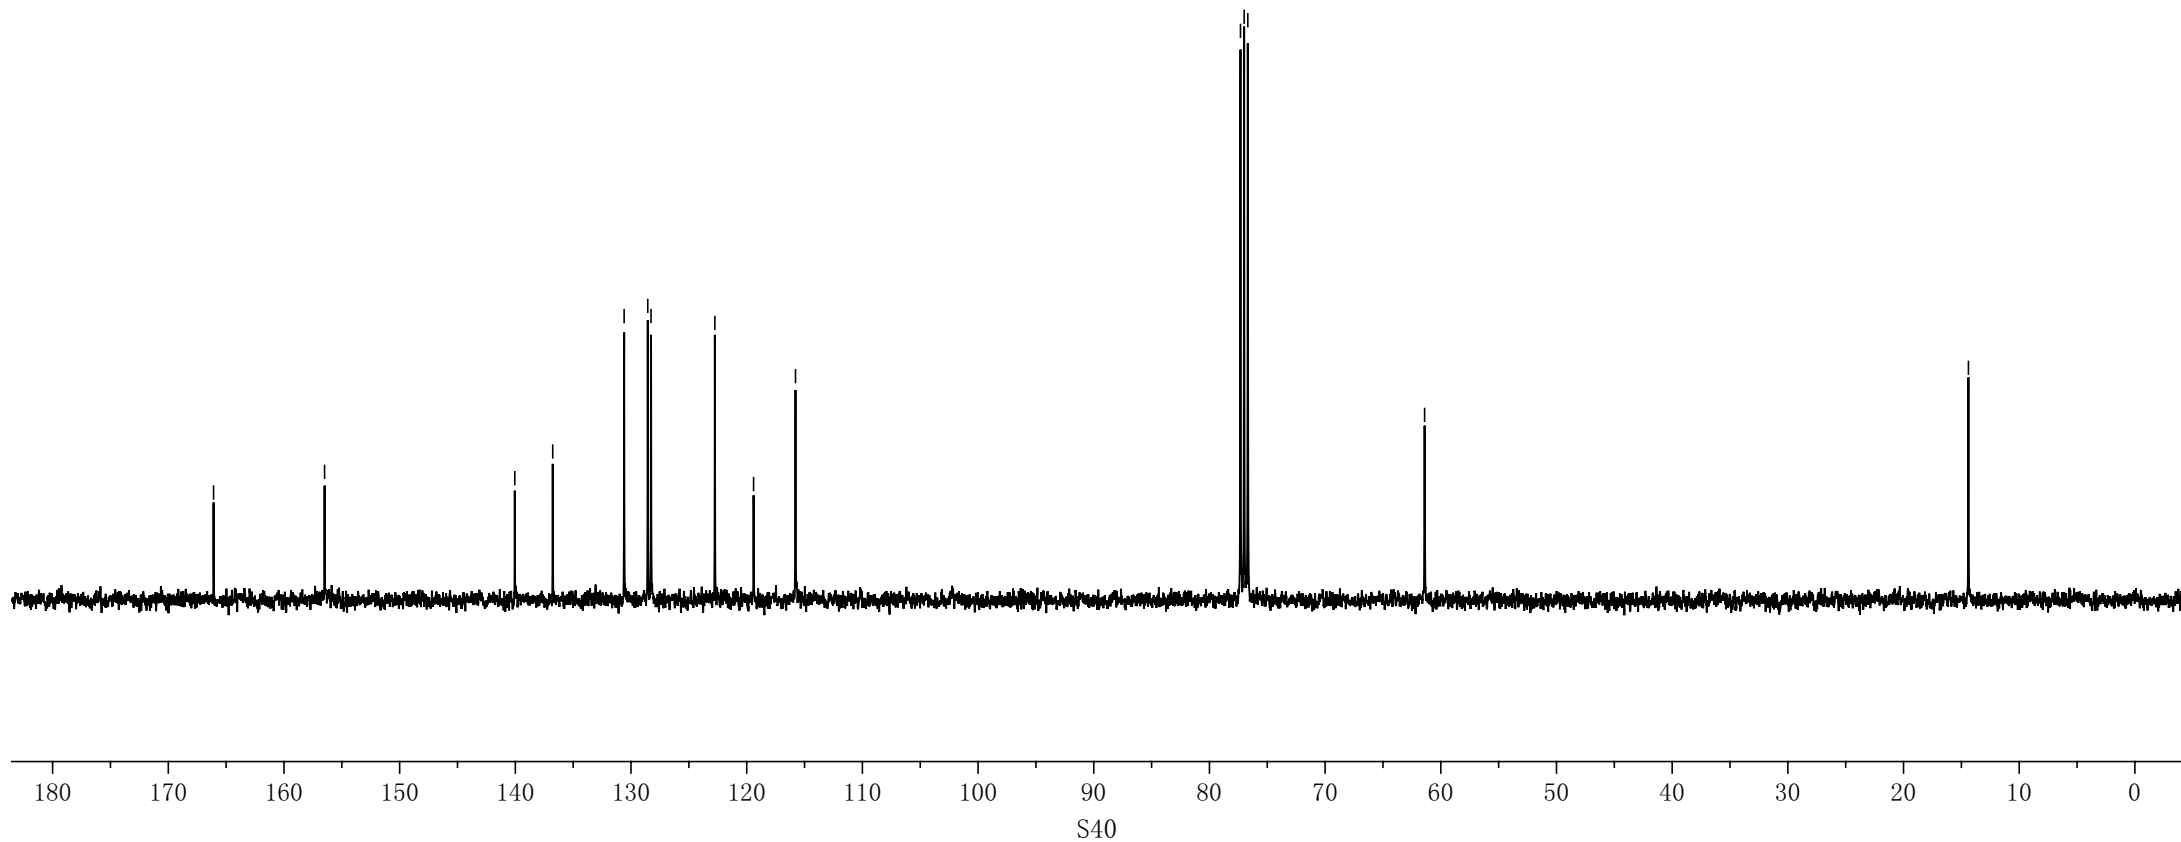



7.819  
7.797  
7.744  
7.725  
7.720  
7.471  
7.466  
7.449  
7.444  
7.260

6.379

4.449  
4.431  
4.413  
4.395

1.434  
1.416  
1.399

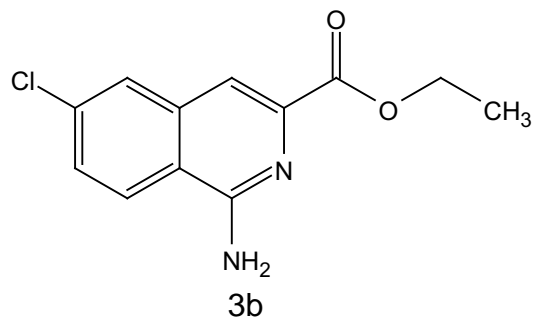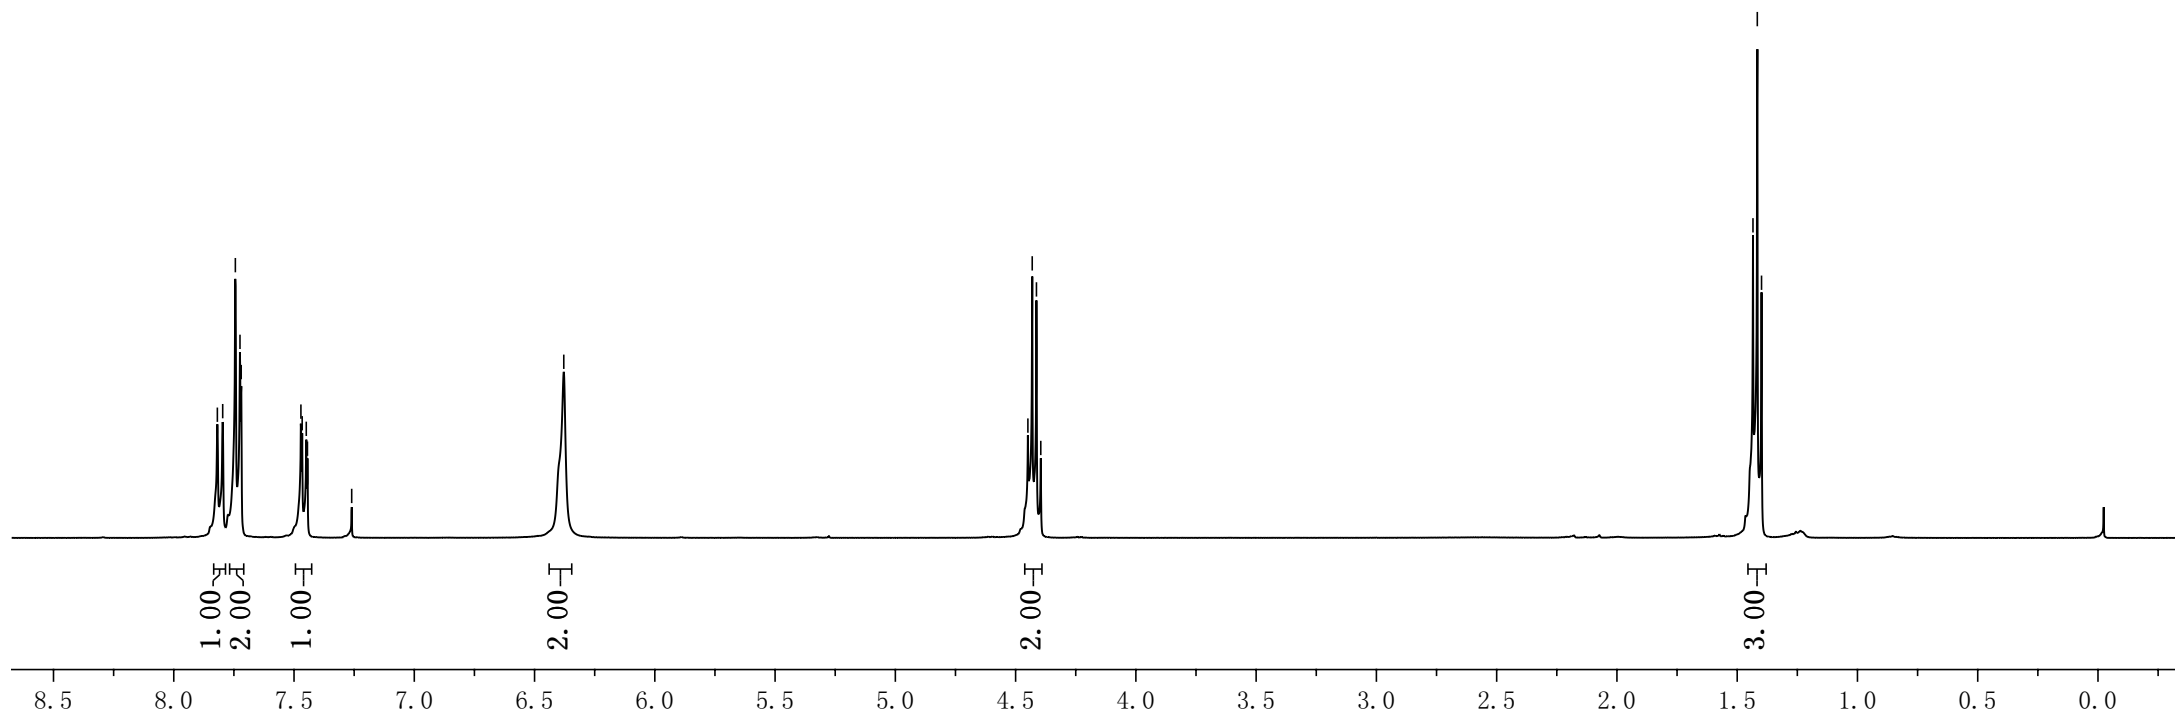

1.00H  
2.00H

1.00H

2.00H

2.00H

3.00H

—165.689

—156.739

~141.081

~137.810

~136.746

~128.723

~127.145

~124.604

—117.442

—114.193

77.318

77.000

76.682

—61.468

—14.324

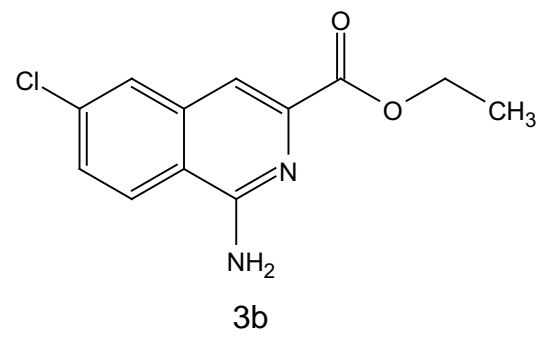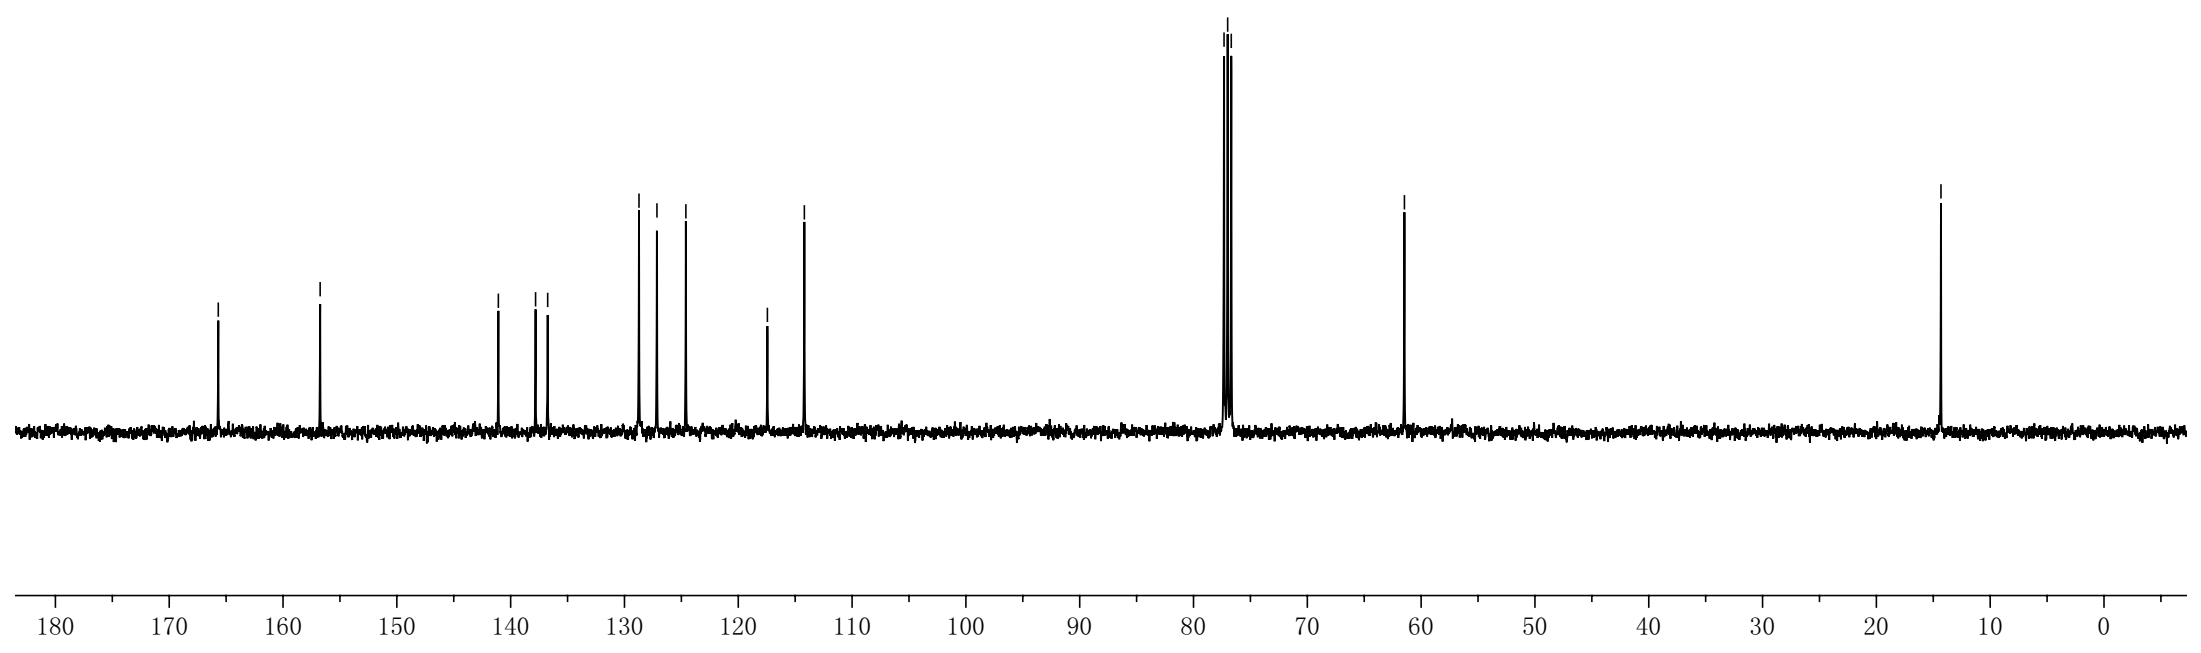

7.984  
7.979  
7.832  
7.735  
7.713  
7.684  
7.679  
7.662  
7.657  
7.260

5.764

4.489  
4.471  
4.453  
4.436

1.458  
1.440  
1.422

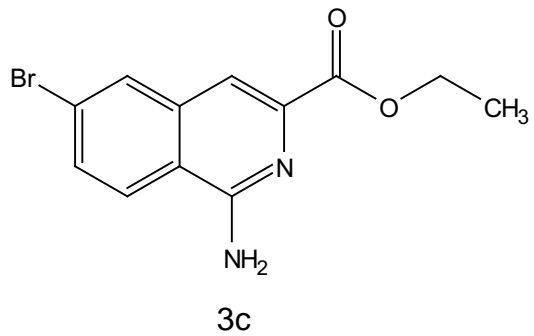

1.00  
1.00  
1.00  
1.00

2.00

2.00

3.00

8.5 8.0 7.5 7.0 6.5 6.0 5.5 5.0 4.5 4.0 3.5 3.0 2.5 2.0 1.5 1.0 0.5 0.0

S43

—165.712

—156.407

—141.349

—138.296

—131.554

—130.694

—125.375

—124.454

—117.735

—114.613

—77.319

—77.000

—76.683

—61.637

—14.383

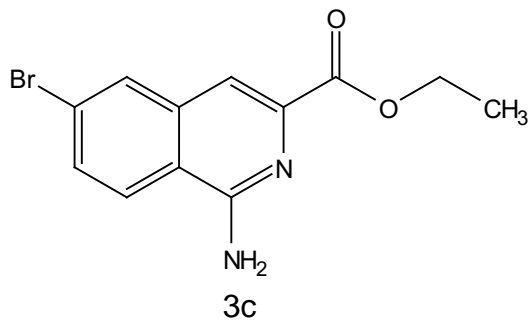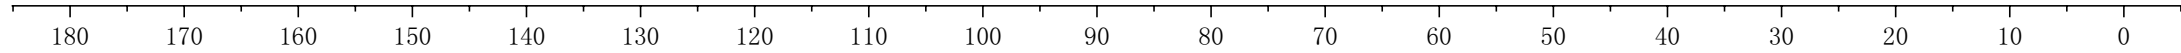

8.379  
8.365  
8.356  
8.342  
7.719  
7.712  
7.705  
7.687  
7.680  
7.503  
7.496  
7.481  
7.474  
7.458  
7.452  
7.281

4.322  
4.304  
4.287  
4.269

2.505  
2.500  
2.496

1.316  
1.298  
1.280

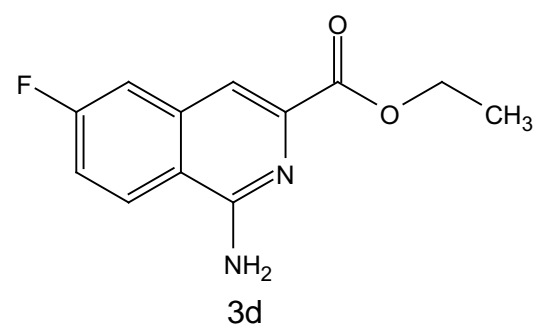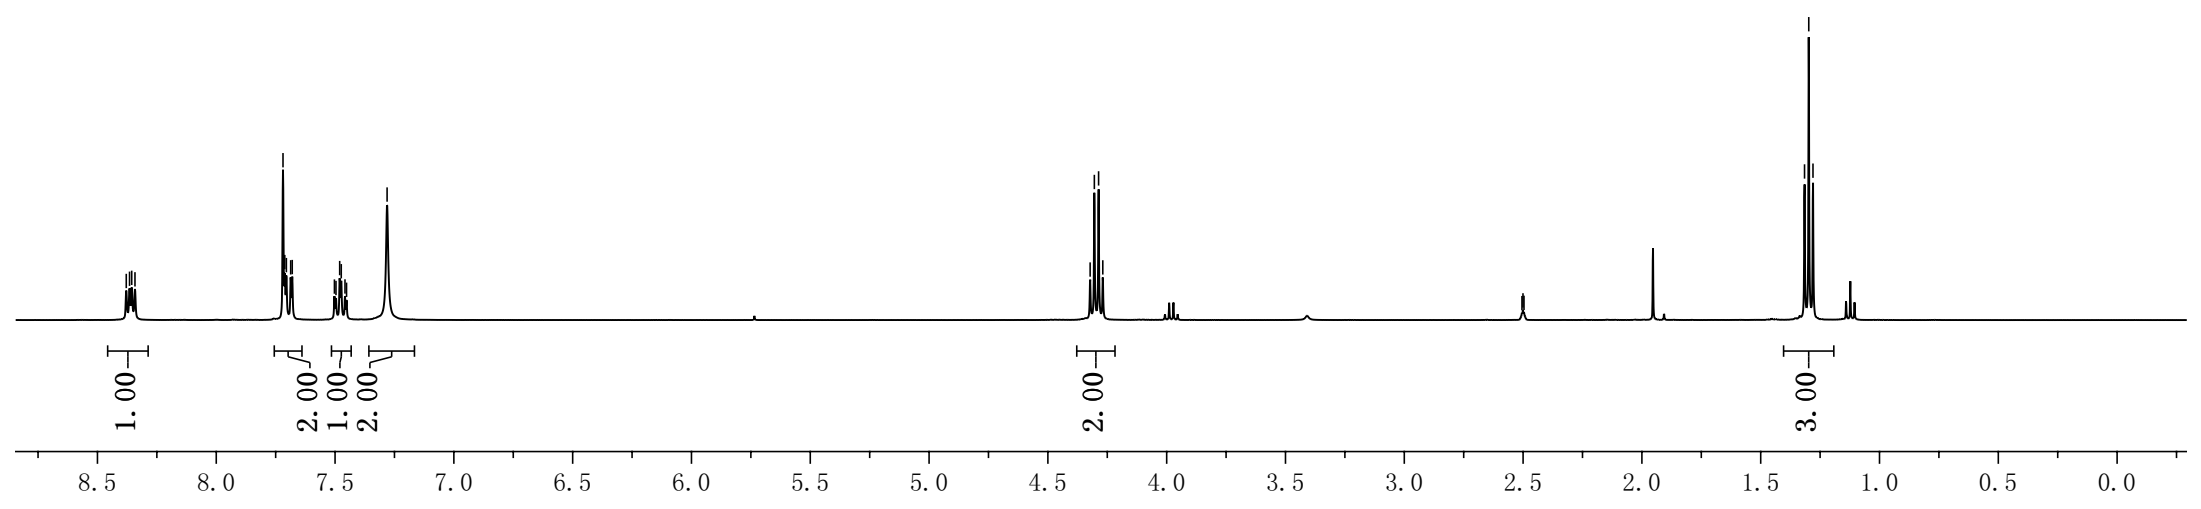

165.737  
164.160  
161.688  
157.429

141.756  
138.743  
138.637

127.659  
127.563  
117.262  
117.018  
115.966  
112.705  
112.669  
111.855  
111.648

60.767

40.226  
40.017  
39.808  
39.600  
39.391  
39.182  
38.973

14.406

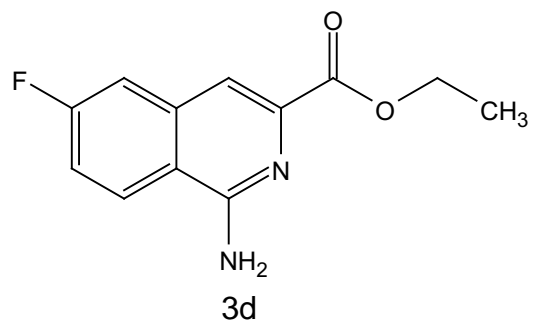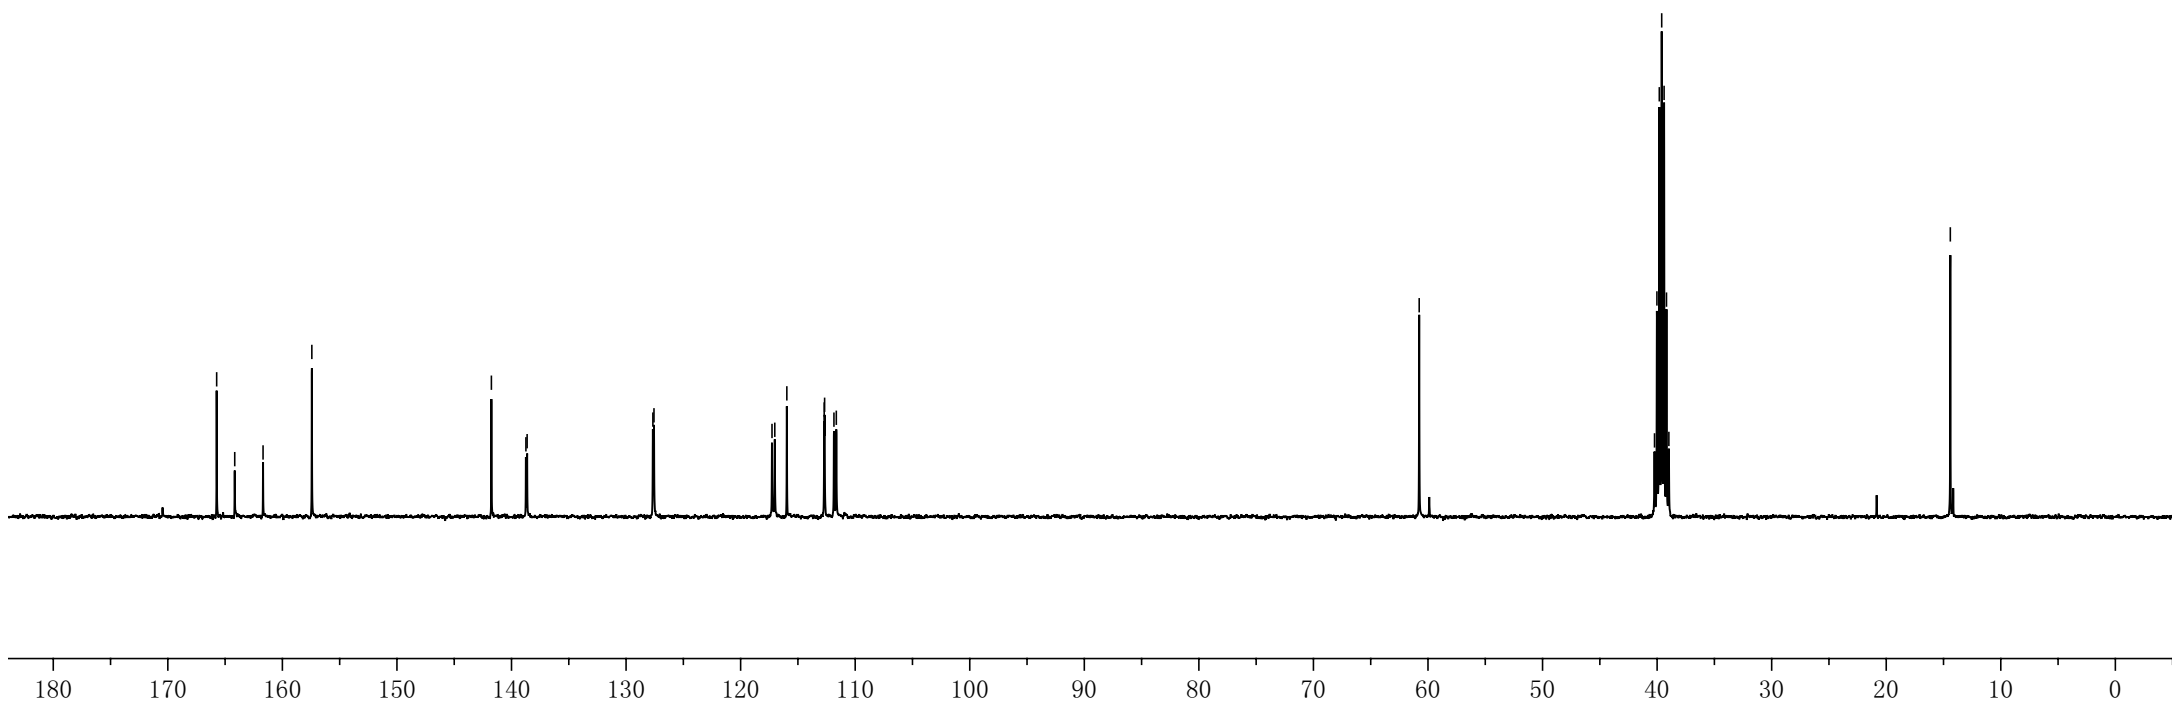

8.129  
8.102  
8.023  
8.008  
8.001  
7.986  
7.780  
7.627  
7.621  
7.605  
7.599  
7.595

4.327  
4.309  
4.292  
4.274

2.500

1.324  
1.306  
1.288

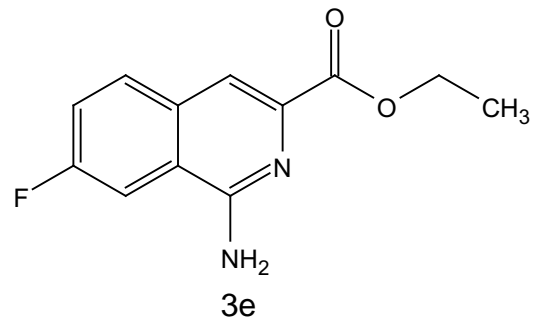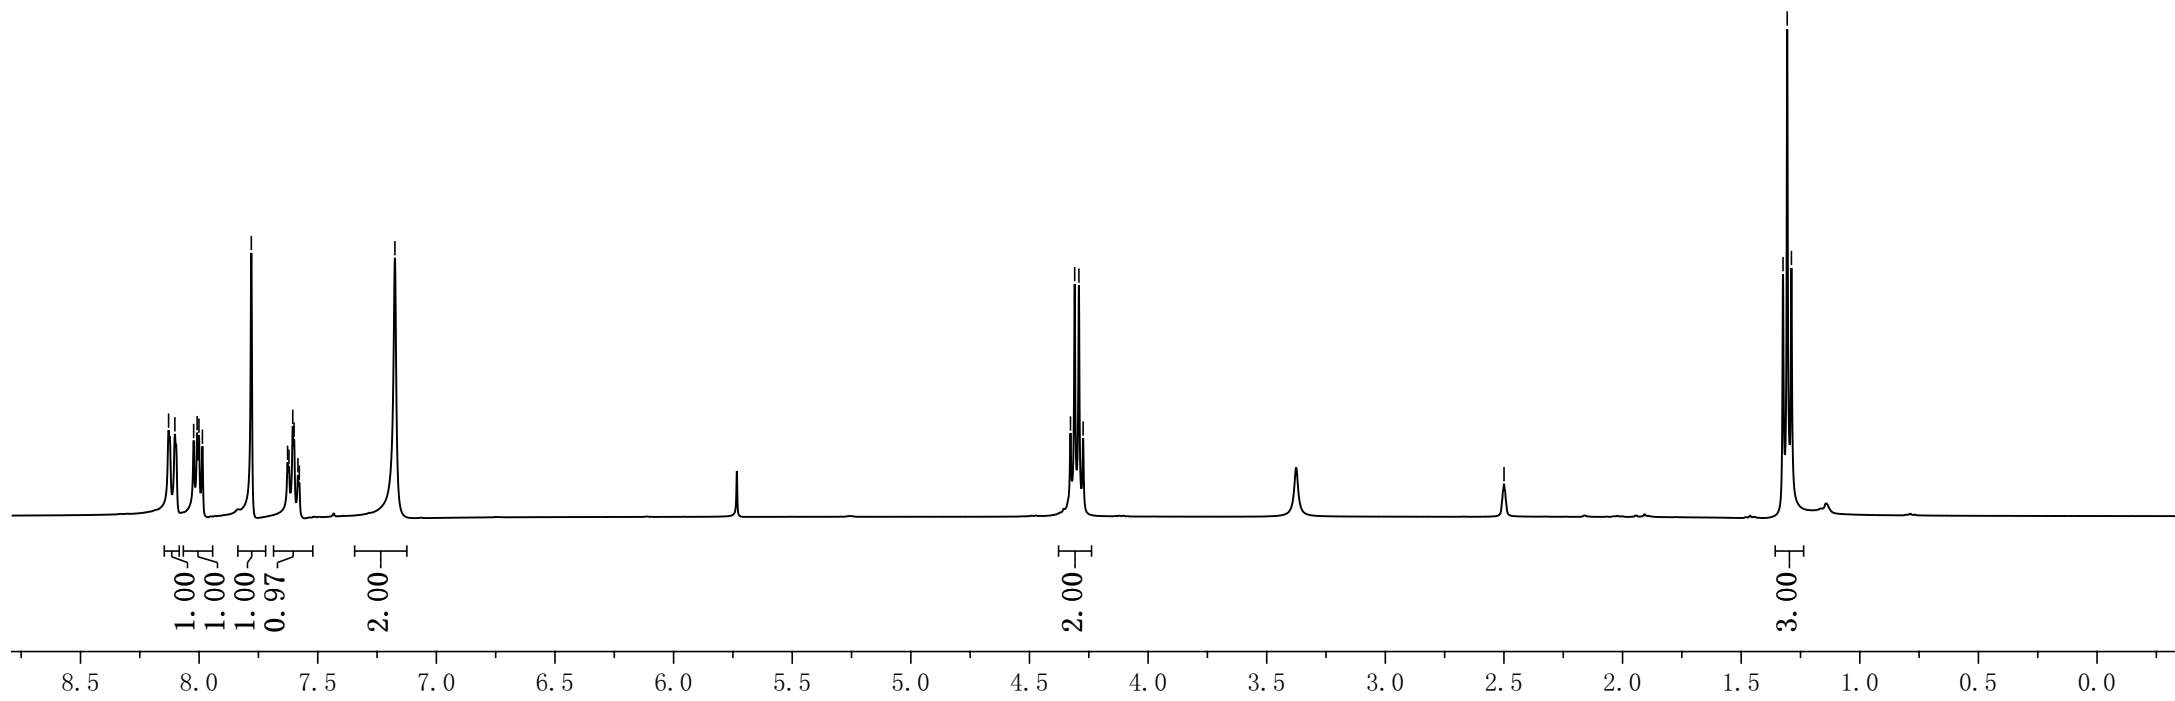

165.733  
162.420  
159.973  
156.995  
156.952

140.059  
140.034  
133.569  
131.225  
131.139  
120.344  
120.101  
119.814  
119.733  
112.857  
108.688  
108.467

60.613

40.226  
40.017  
39.809  
39.600  
39.391  
39.183  
38.975

14.384

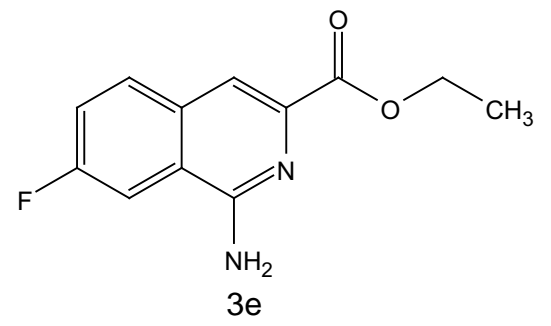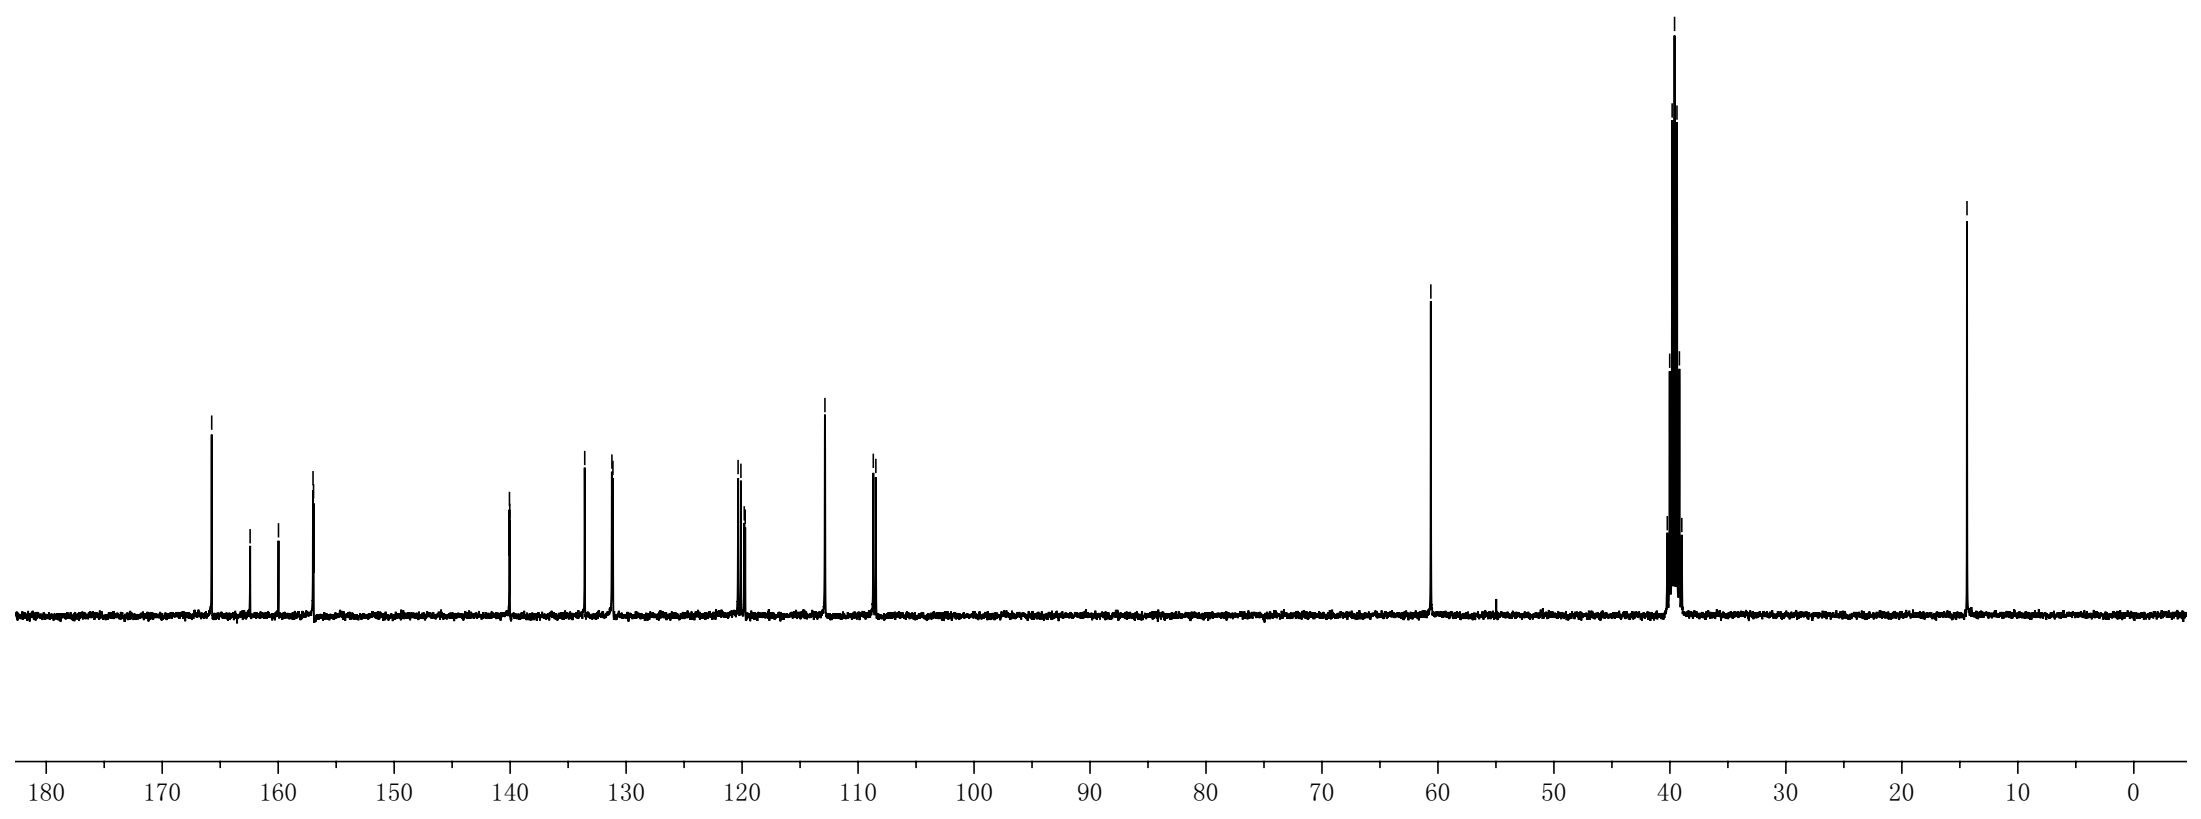



7.756  
7.748  
7.739  
7.699  
7.686  
7.680  
7.666  
7.415  
7.396  
7.382  
7.369  
7.359

4.340  
4.322  
4.304  
4.286

2.504  
2.500  
2.495

1.335  
1.317  
1.299

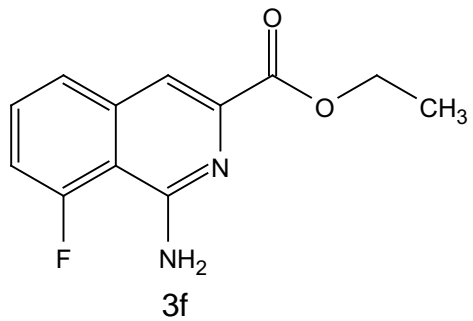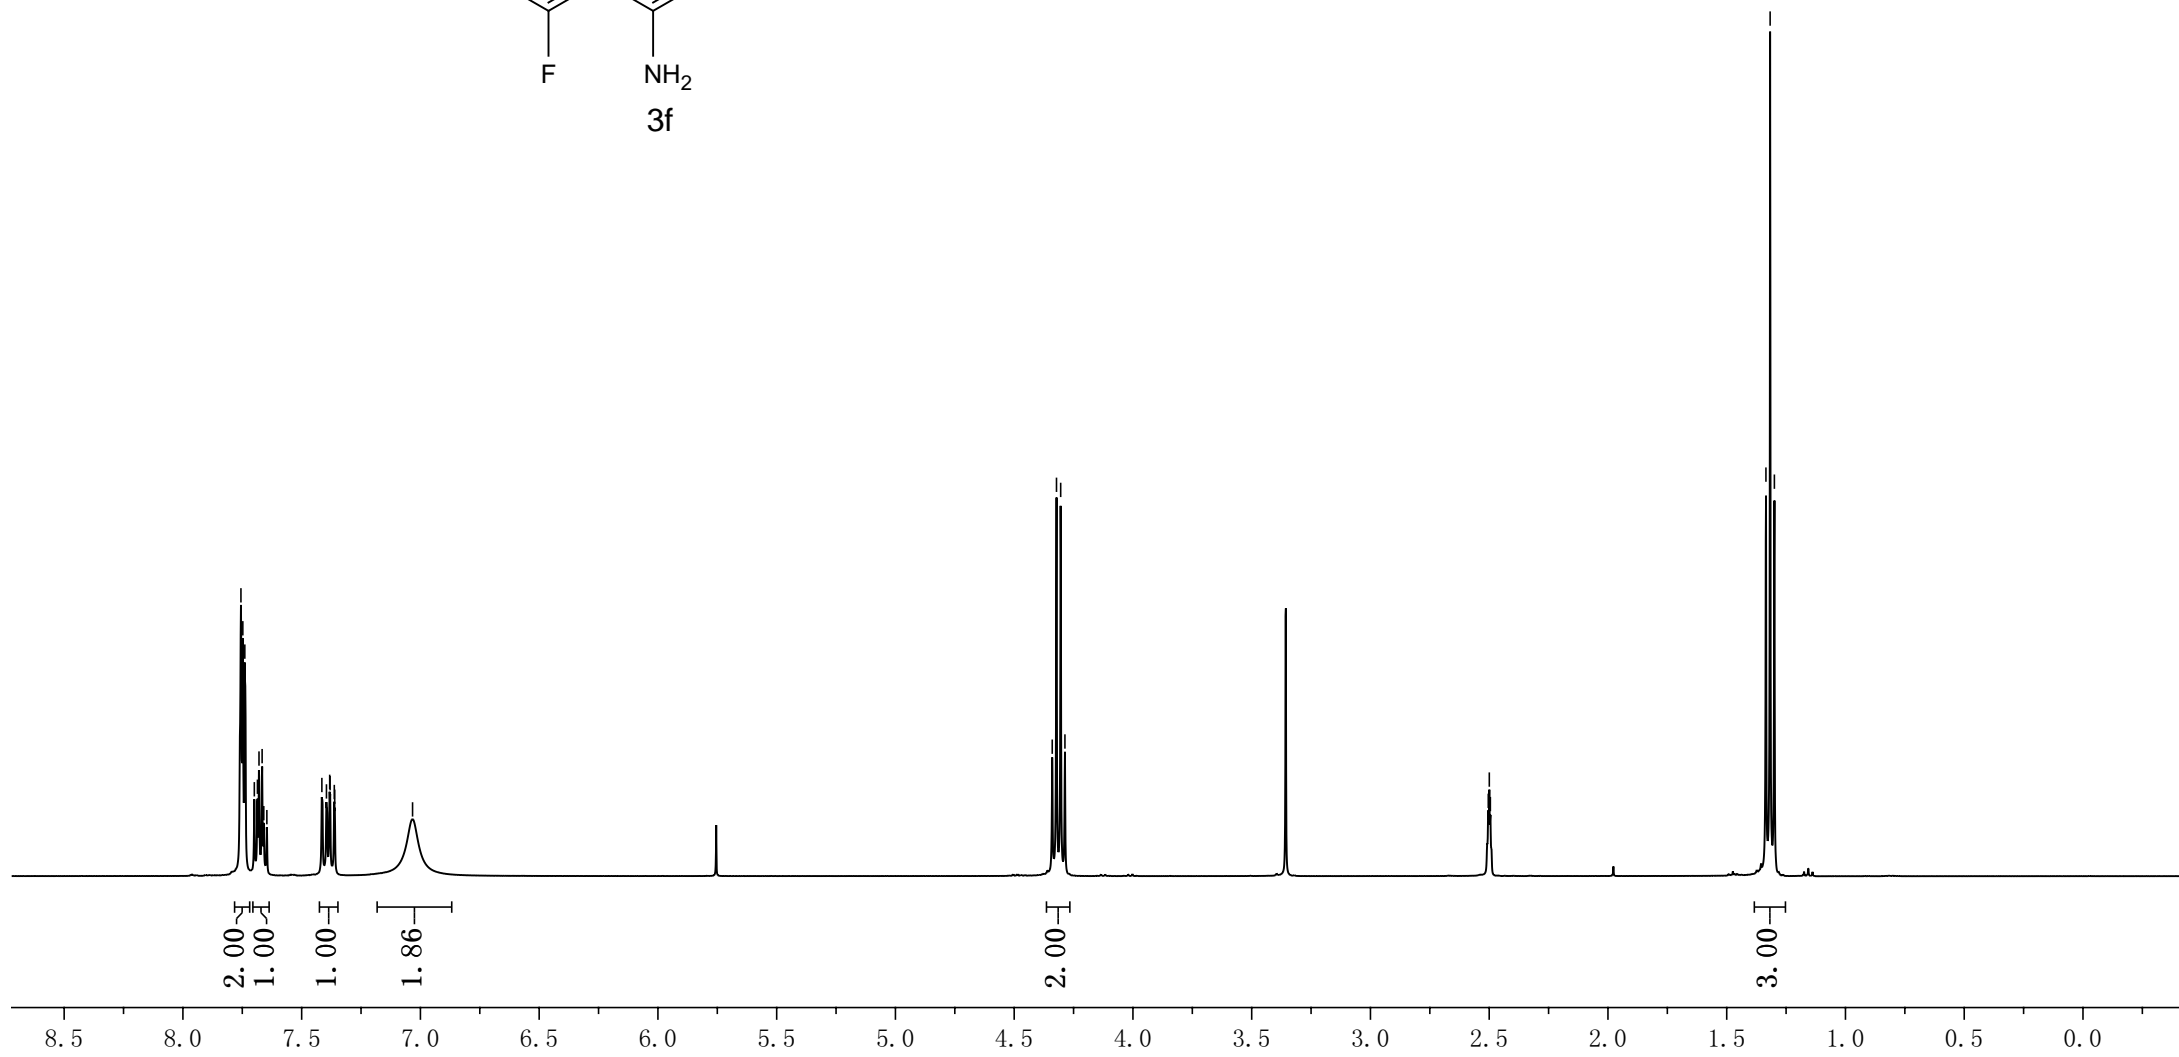

2.00  
1.00  
1.00  
1.86

2.00

3.00

165.389  
160.355  
157.856  
154.981  
154.939

141.424  
139.535

131.600  
131.501  
124.515  
124.480

113.514  
113.281  
112.315  
108.470  
108.353

60.839

40.225  
40.017  
39.808  
39.600  
39.391  
39.182  
38.973

14.395

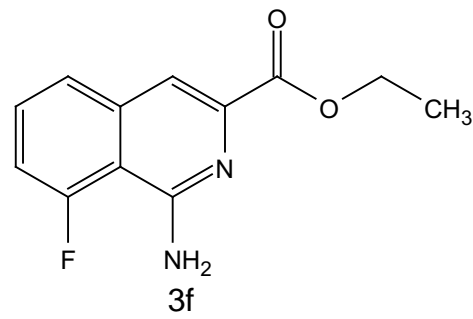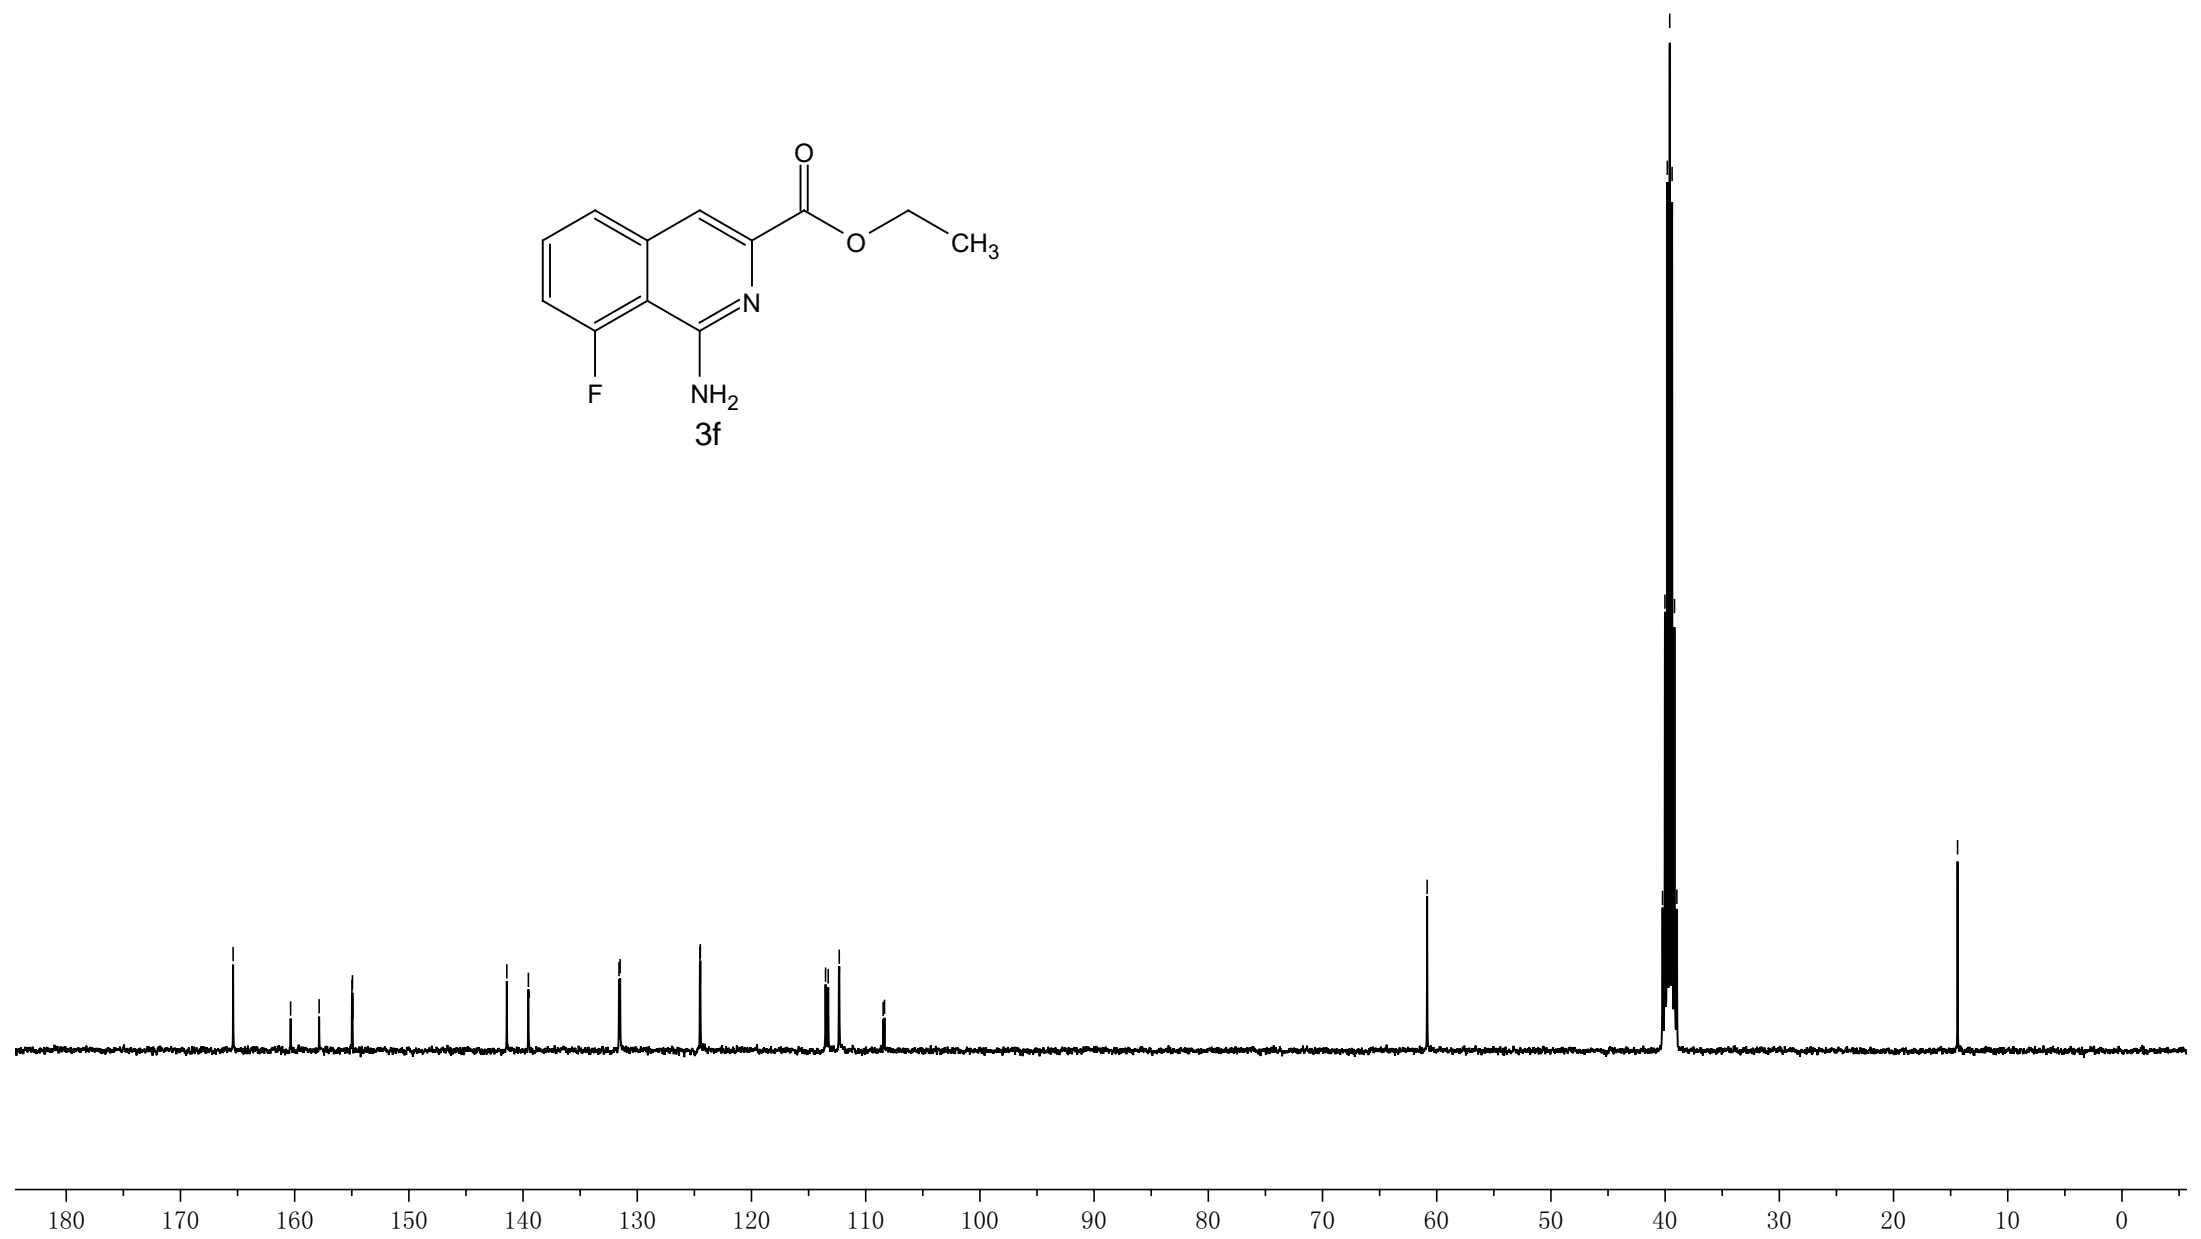

8.086  
7.801  
7.780  
7.721  
7.531  
7.511  
7.036

4.324  
4.306  
4.289  
4.271

2.500  
2.470

1.327  
1.309  
1.291

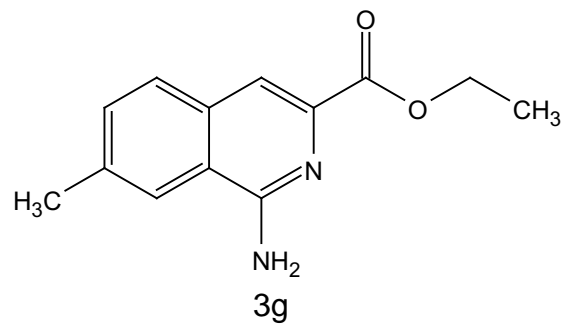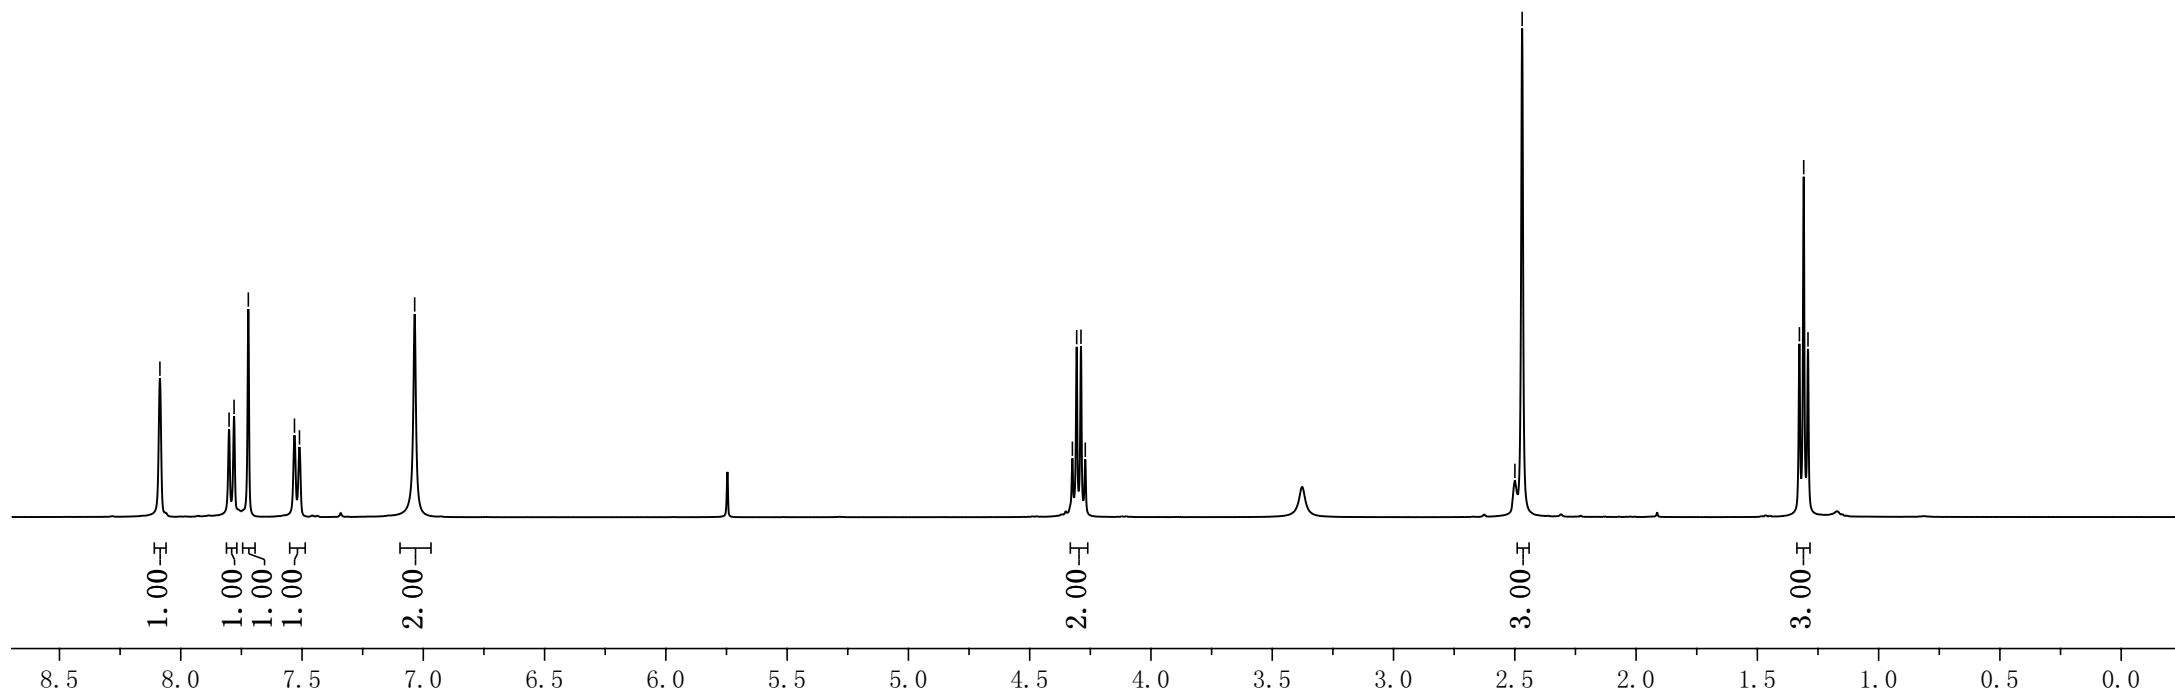

—165.889

—156.904

—139.591

—137.747

—134.373

—132.309

—127.983

—123.277

—119.065

—113.305

—60.463

—40.228

—40.017

—39.808

—39.600

—39.392

—39.182

—38.974

—21.611

—14.409

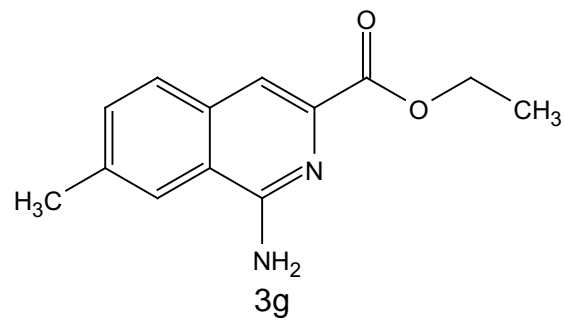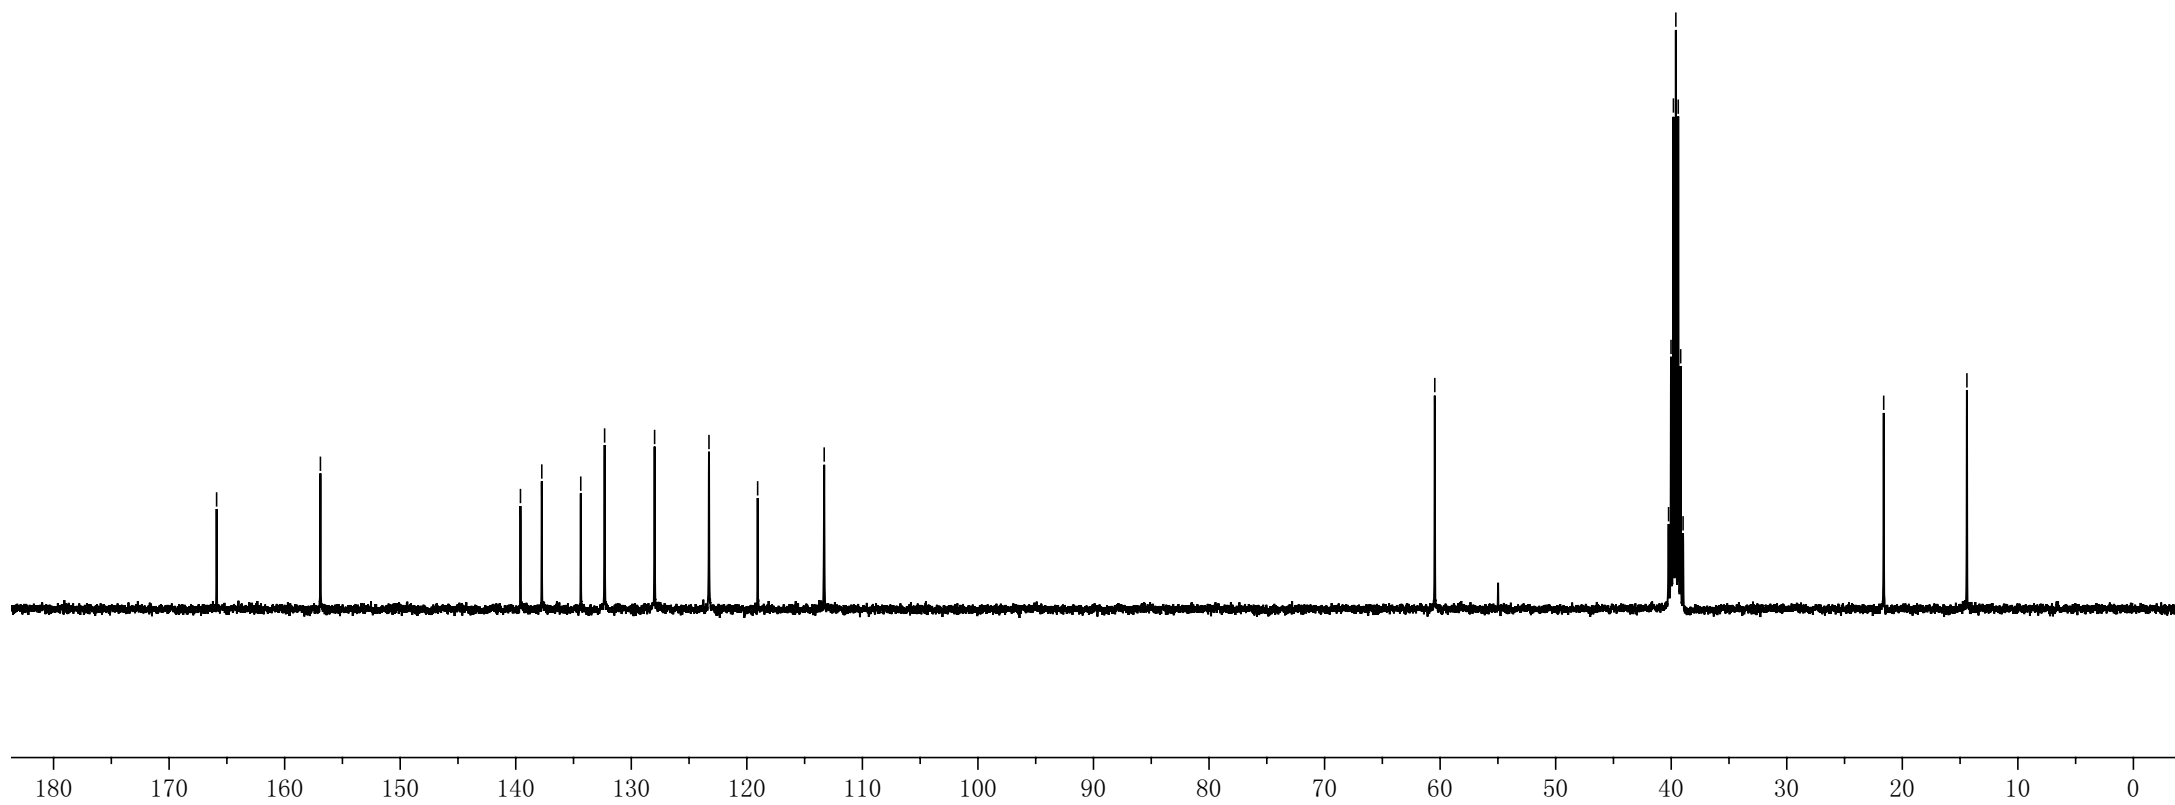

7.843  
7.821  
7.743  
7.686  
7.681  
7.339  
7.333  
7.317  
7.311  
7.074

4.317  
4.299  
4.281  
4.263  
— 3.891

2.504  
2.500  
2.496

1.318  
1.300  
1.282

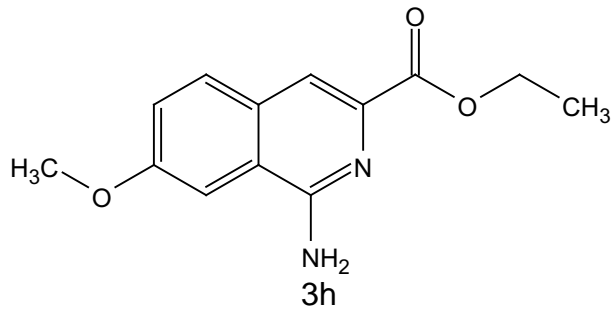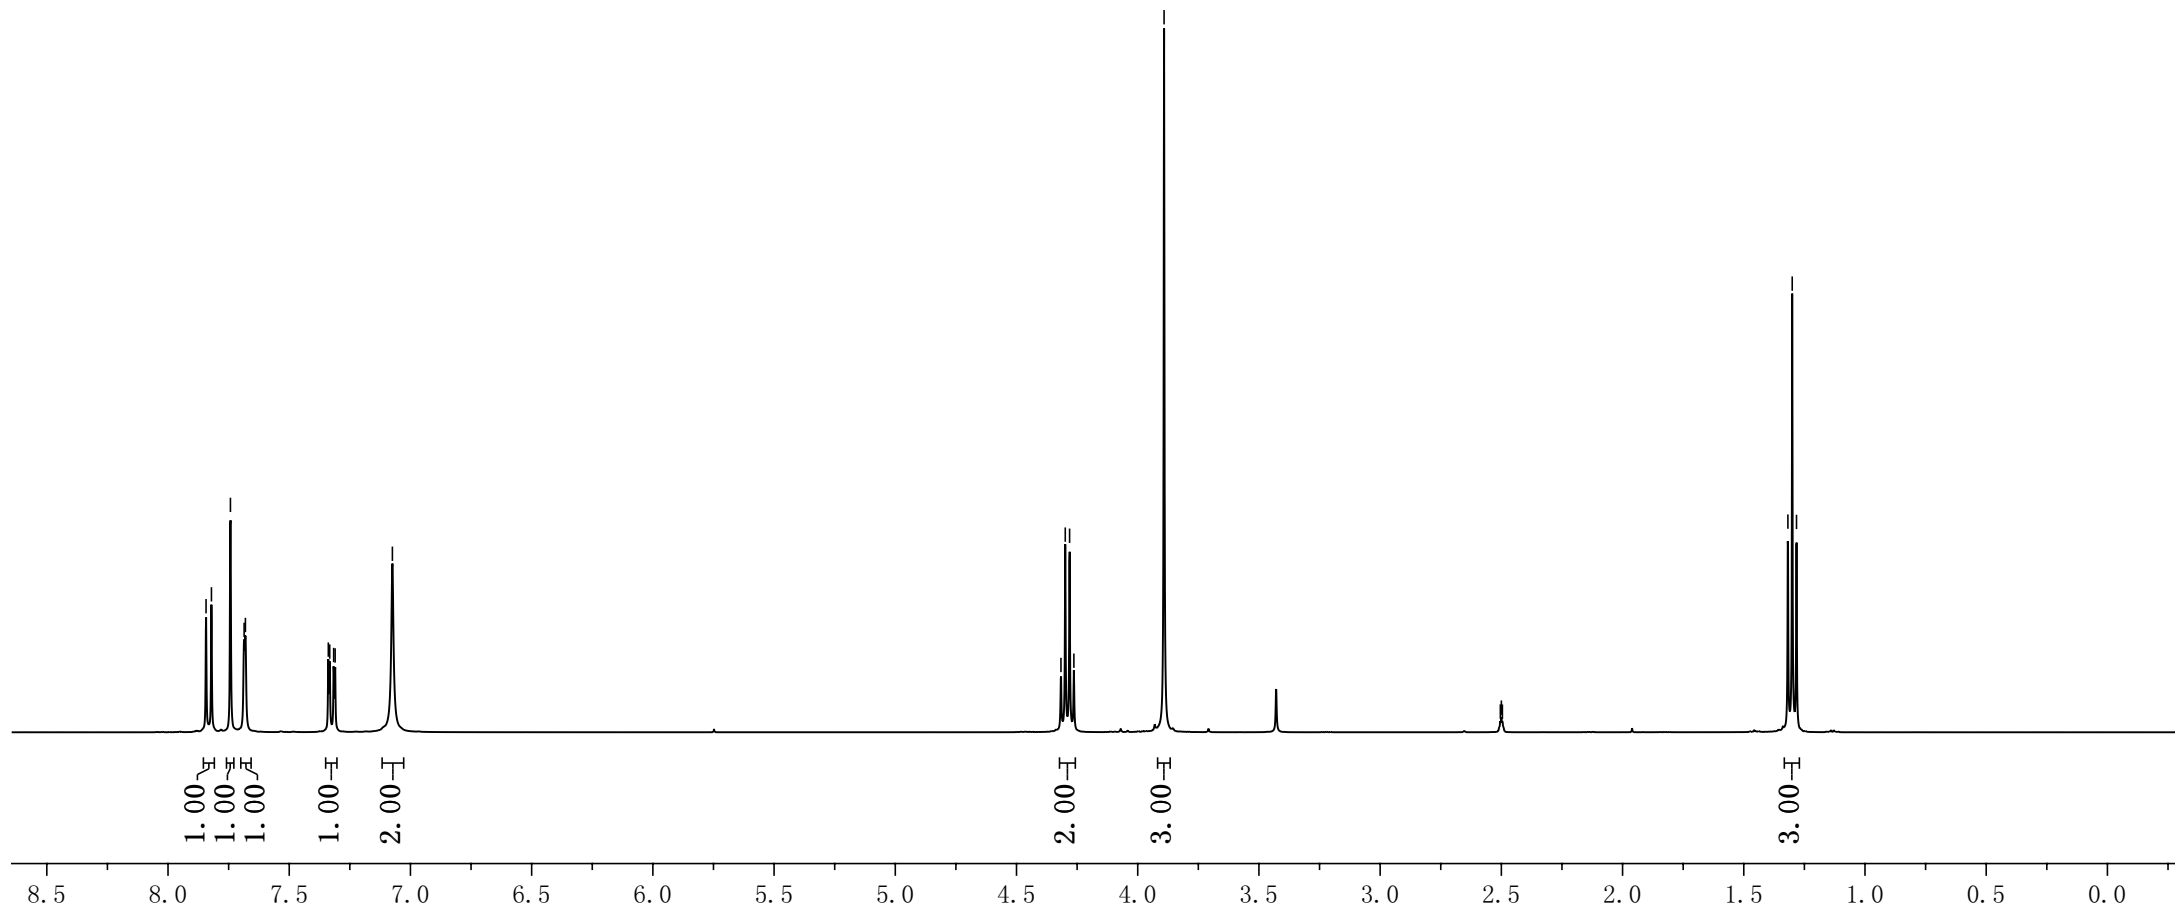

—166.018  
—159.268  
—156.559

—138.274  
~131.105  
~129.900  
~121.970  
~120.301  
—113.560  
—103.962

—60.461  
—55.860

40.227  
40.018  
39.809  
39.600  
39.392  
39.183  
38.974

—14.481

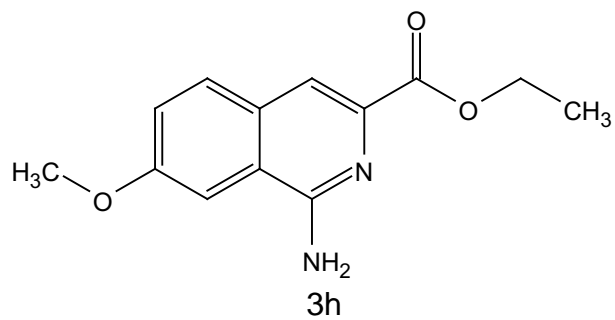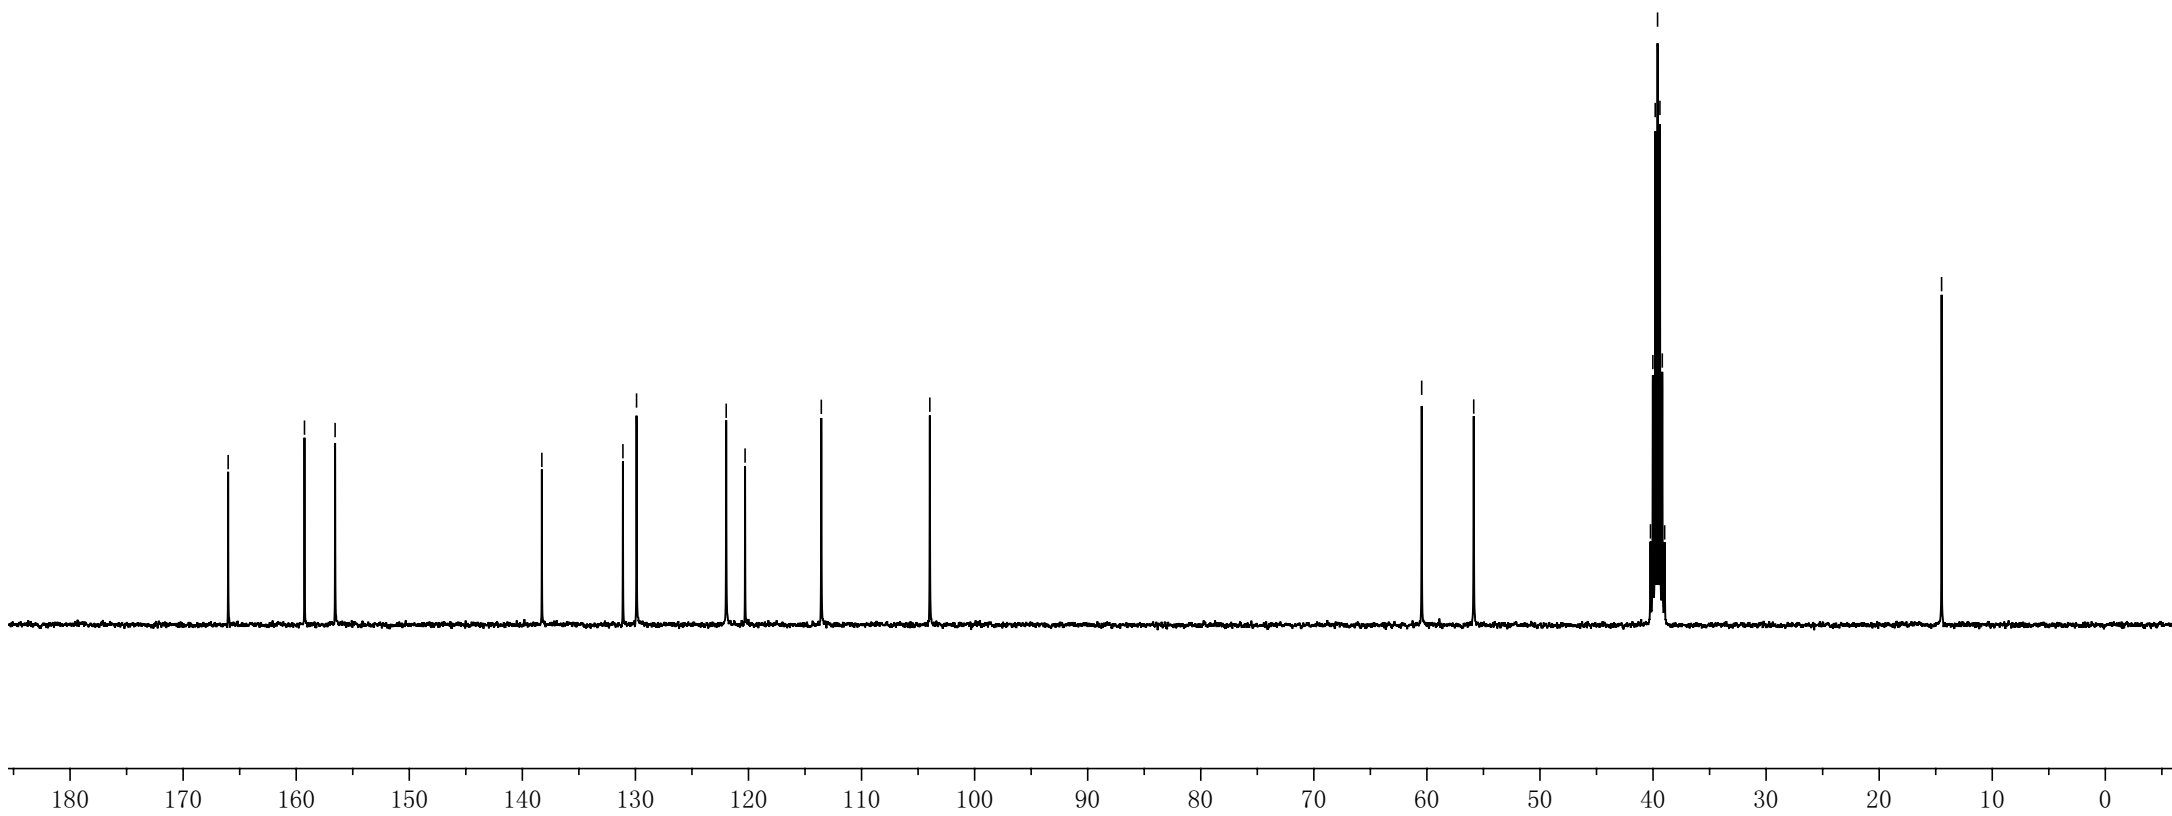

8.195  
8.173  
7.687  
7.346  
7.340  
7.217  
7.211  
7.195  
7.188  
7.047

4.319  
4.301  
4.284  
4.266  
3.870

2.504  
2.500  
2.495

1.325  
1.307  
1.290

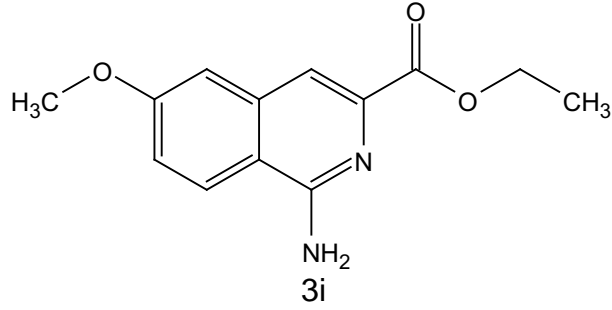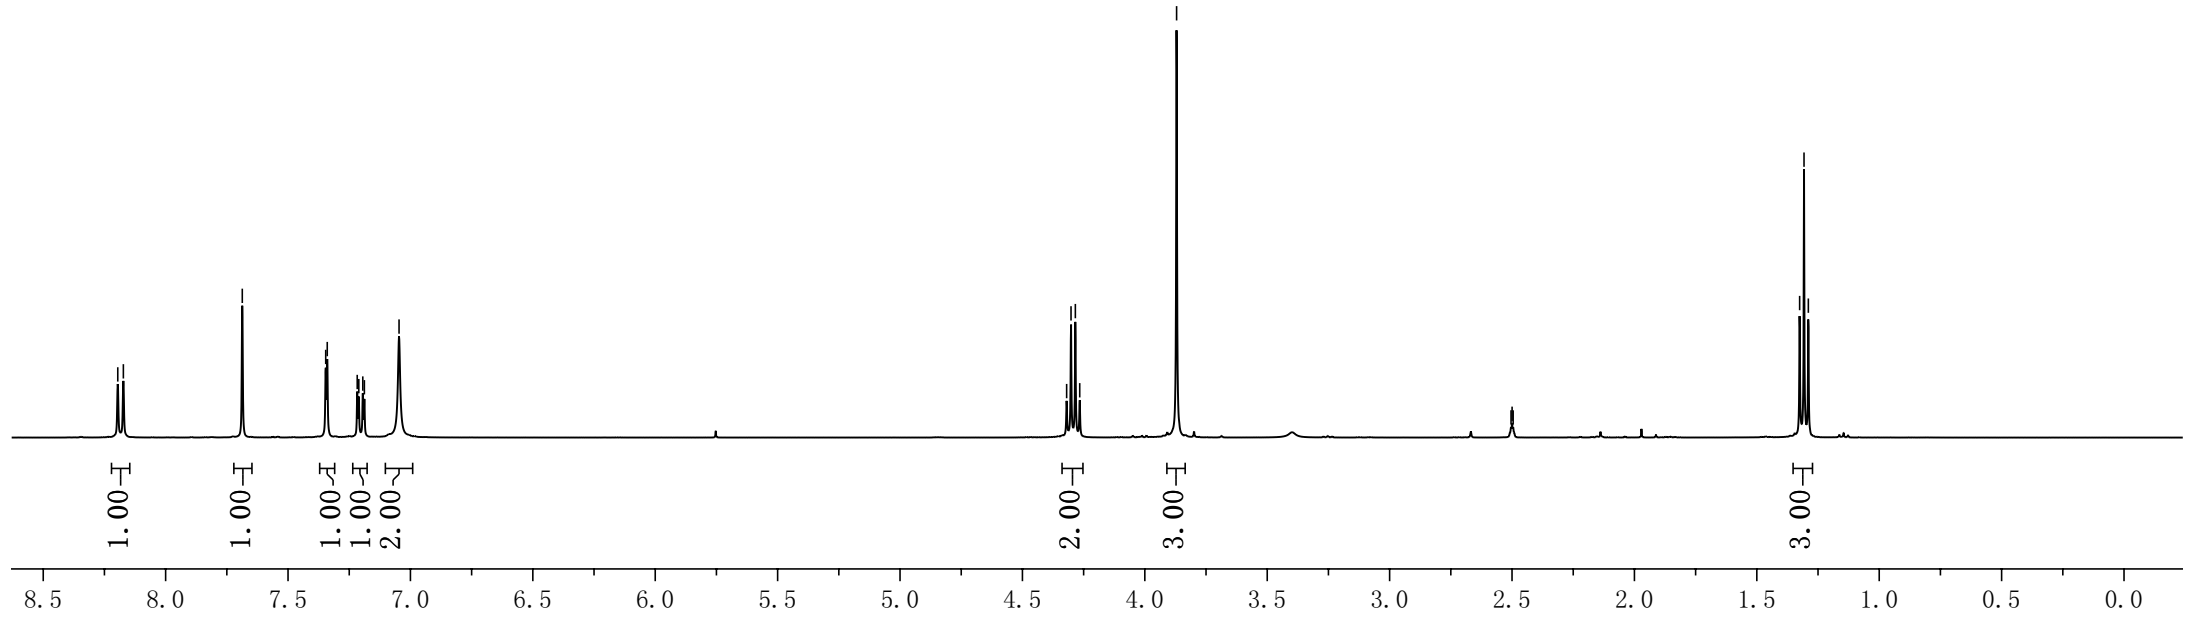

165.979  
160.625  
157.275

141.122  
138.708

125.997

119.058  
113.721  
113.034

107.188

60.596  
55.558

40.226  
40.017  
39.809  
39.600  
39.391  
39.182  
38.973

14.445

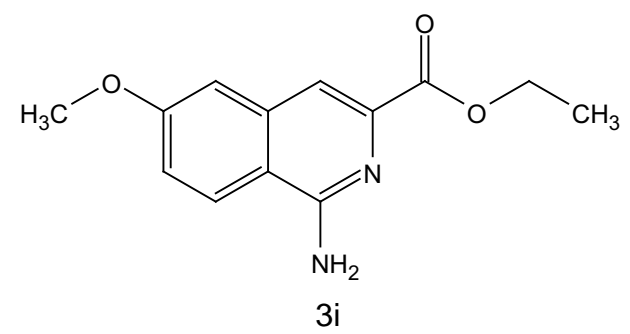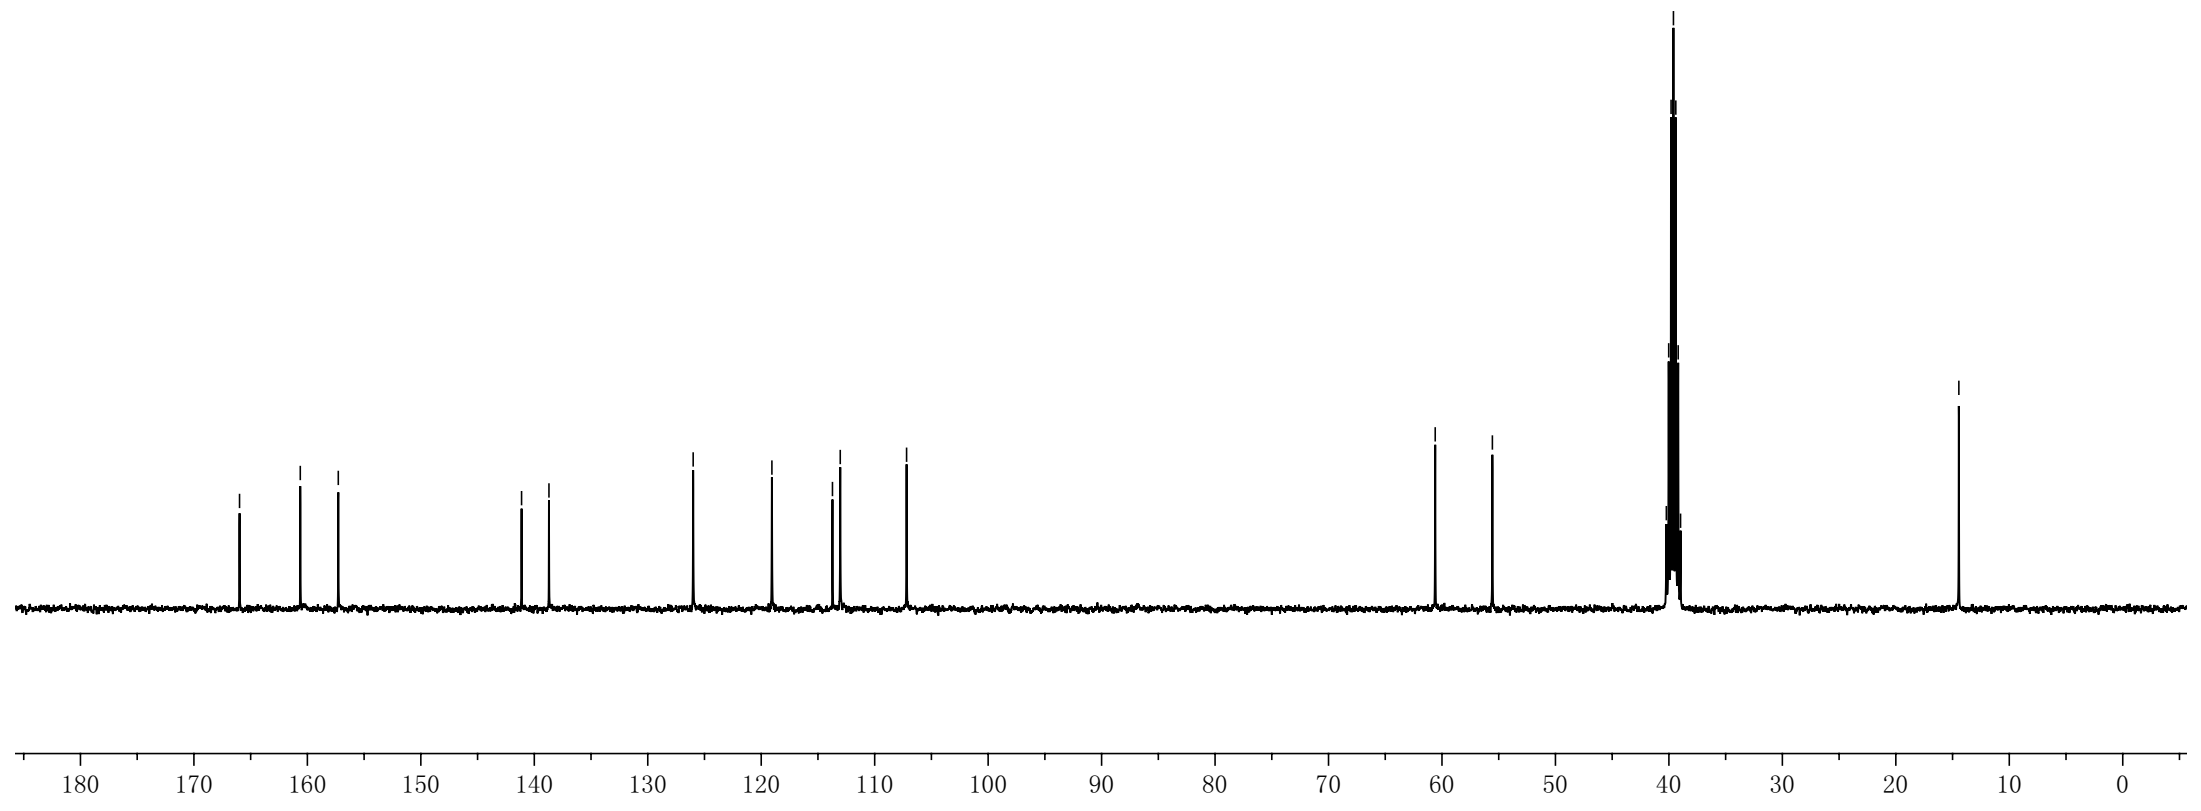



7.612  
7.584  
7.564  
7.544  
7.421  
7.401  
7.336  
7.075  
7.055

4.322  
4.304  
4.286  
4.269  
3.971

2.500

1.327  
1.309  
1.291

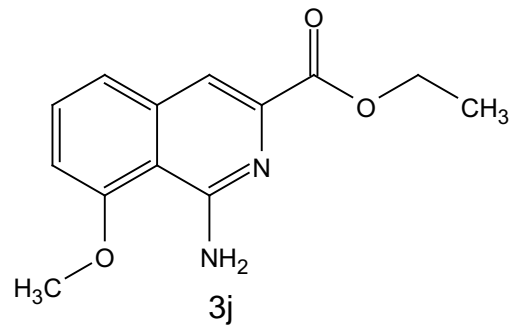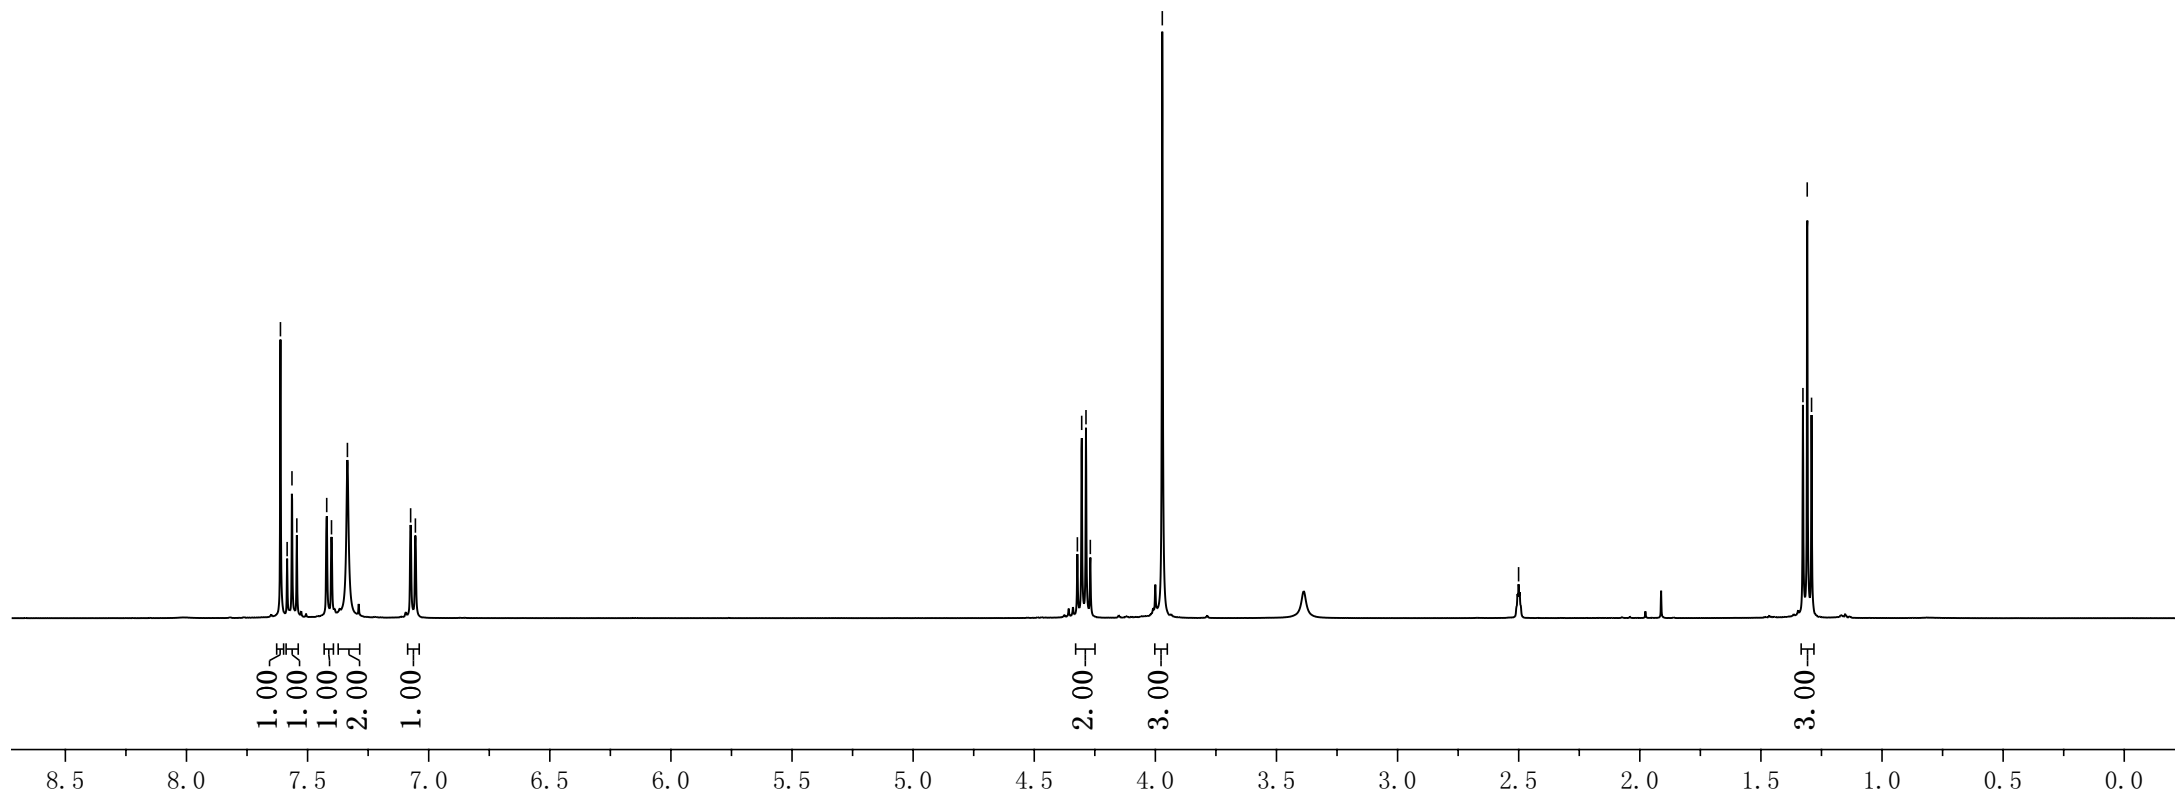

—165.669

157.230  
156.933

140.895  
139.439

—131.274

—120.290

112.478  
109.901  
108.234

—60.659

—56.211

40.226  
40.018  
39.809  
39.600  
39.392  
39.183  
38.974

—14.419

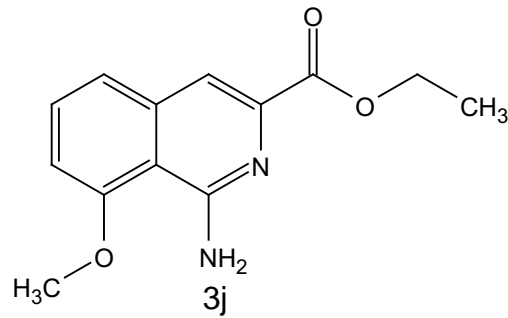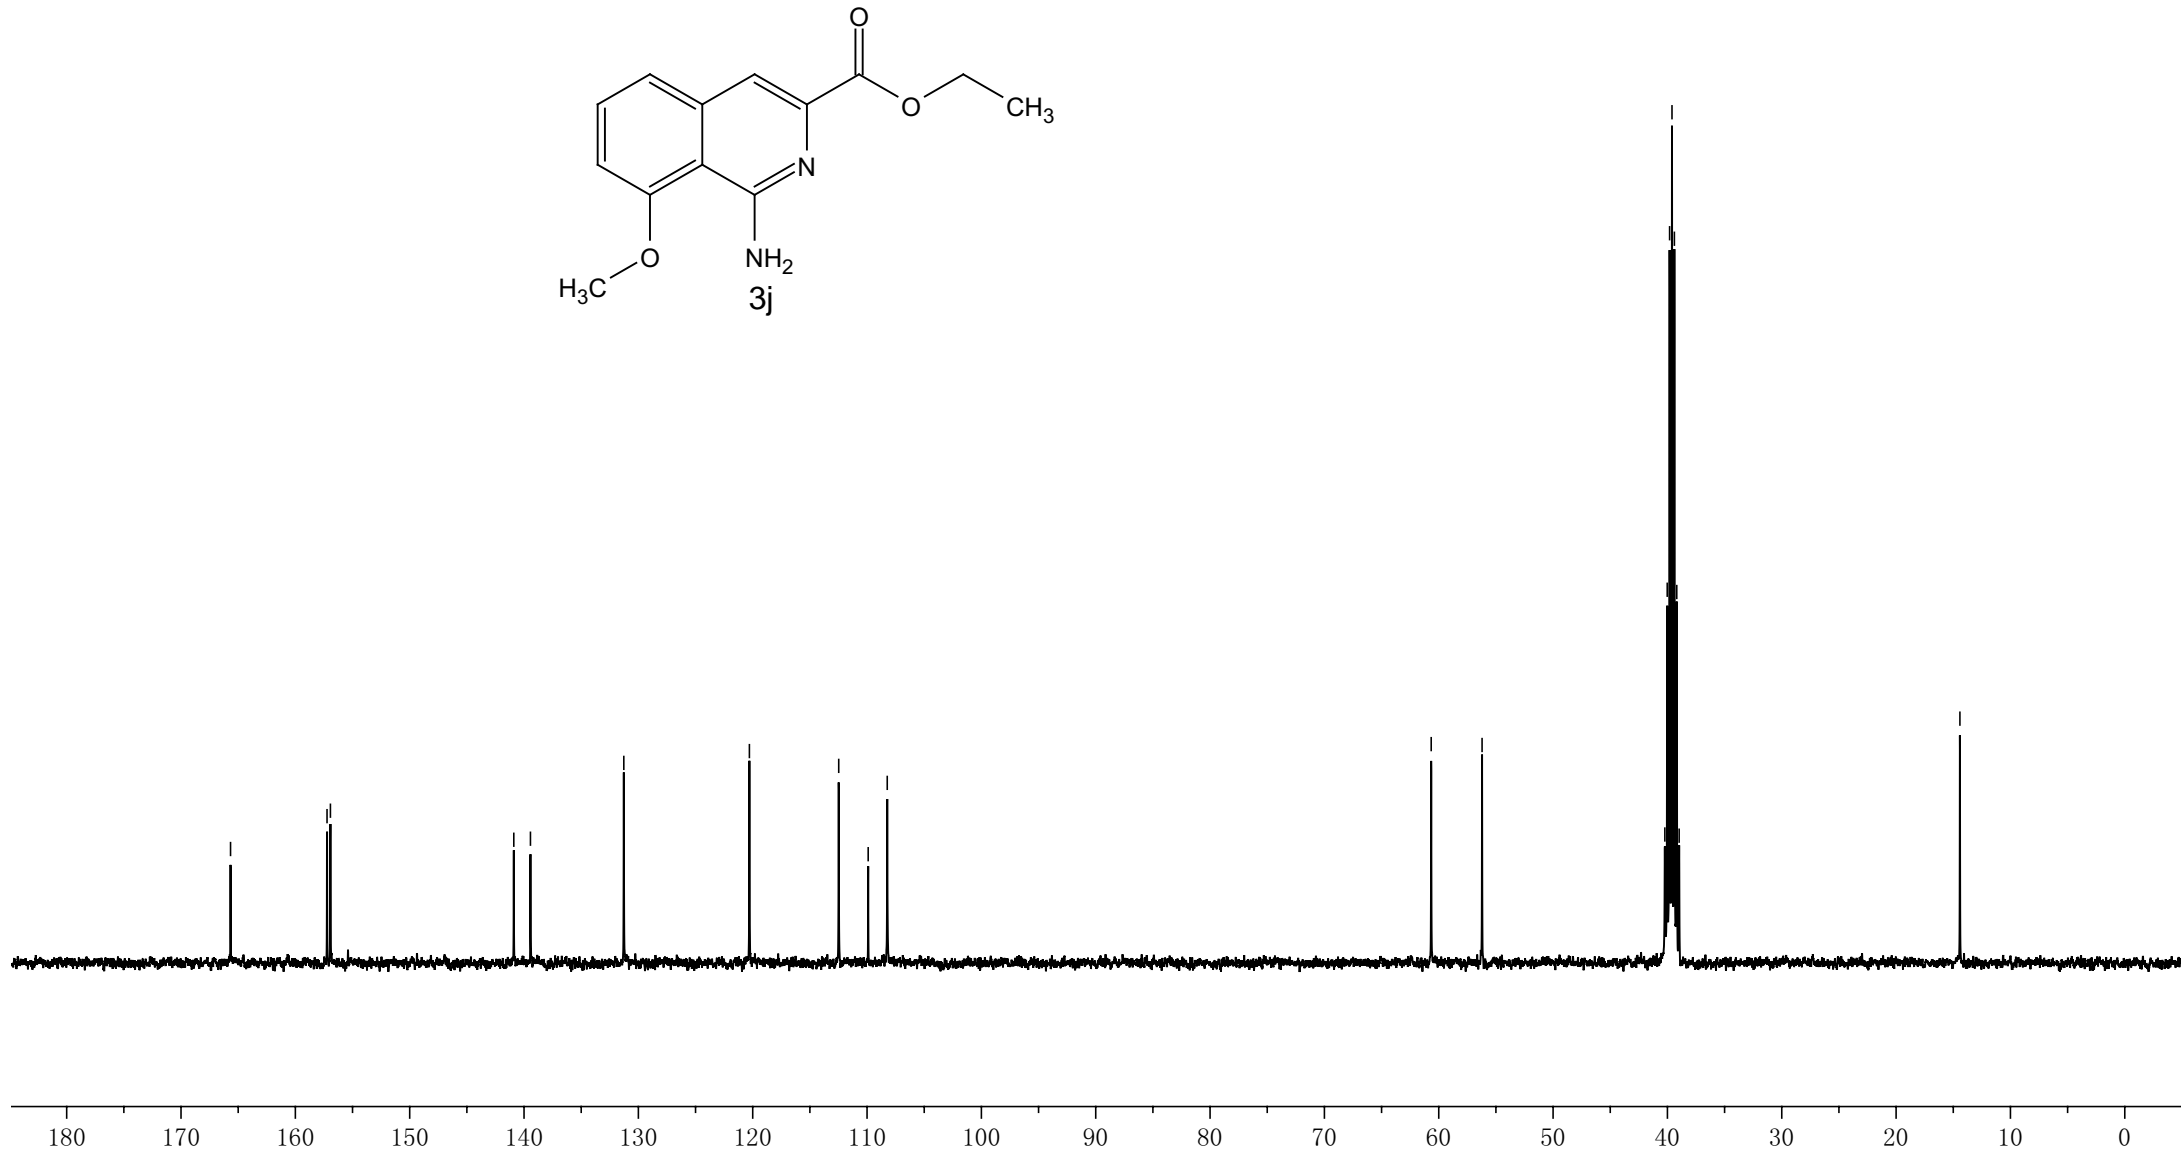

—7.880

7.260

7.115

7.095

—5.510

4.460

4.442

4.425

4.407

3.999

3.971

1.428

1.410

1.392

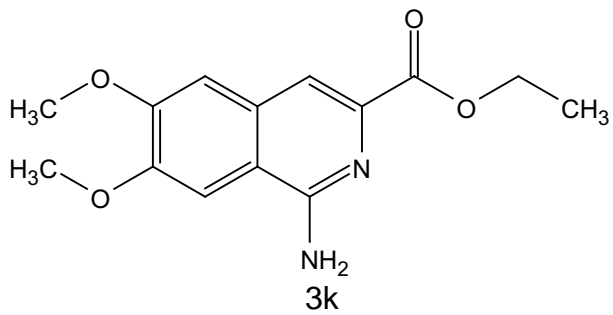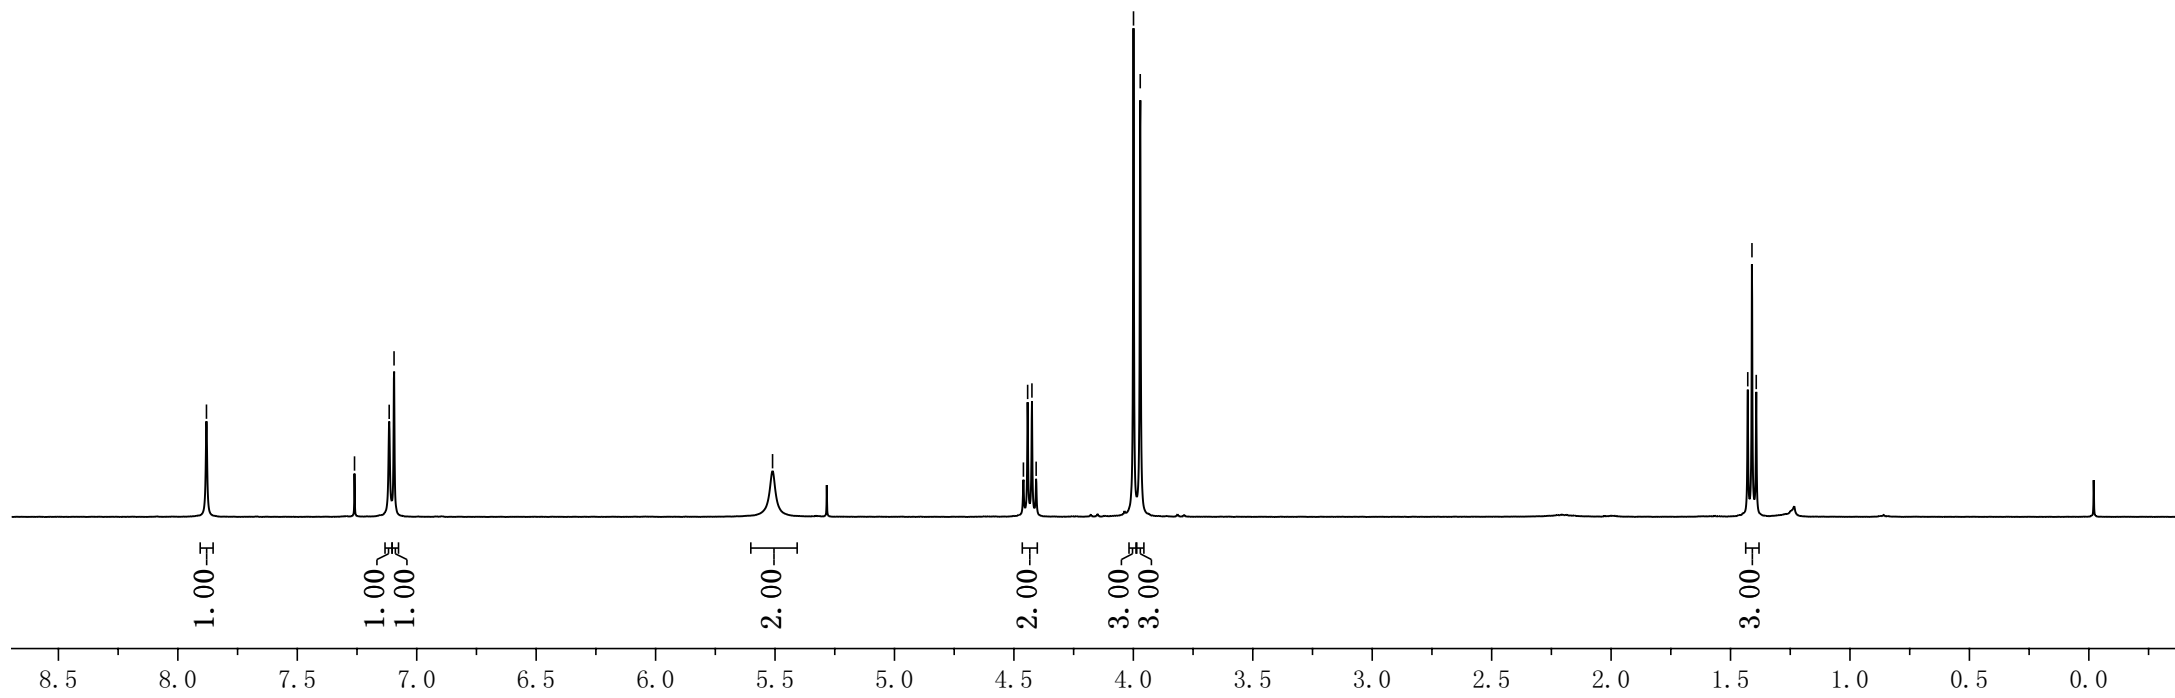

—166.054

—156.149

—152.223

—150.404

—138.854

—132.435

—113.877

—113.118

—107.321

—103.933

—60.393

—56.116

—55.793

—40.226

—40.017

—39.808

—39.600

—39.391

—39.182

—38.973

—14.482

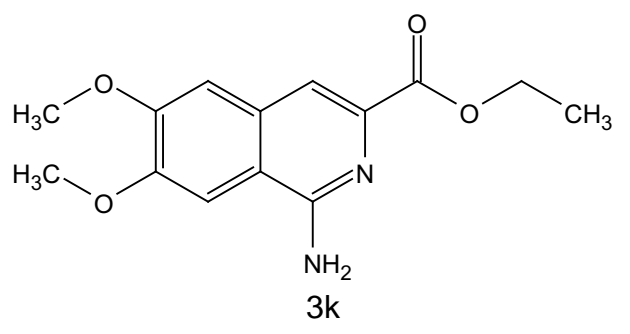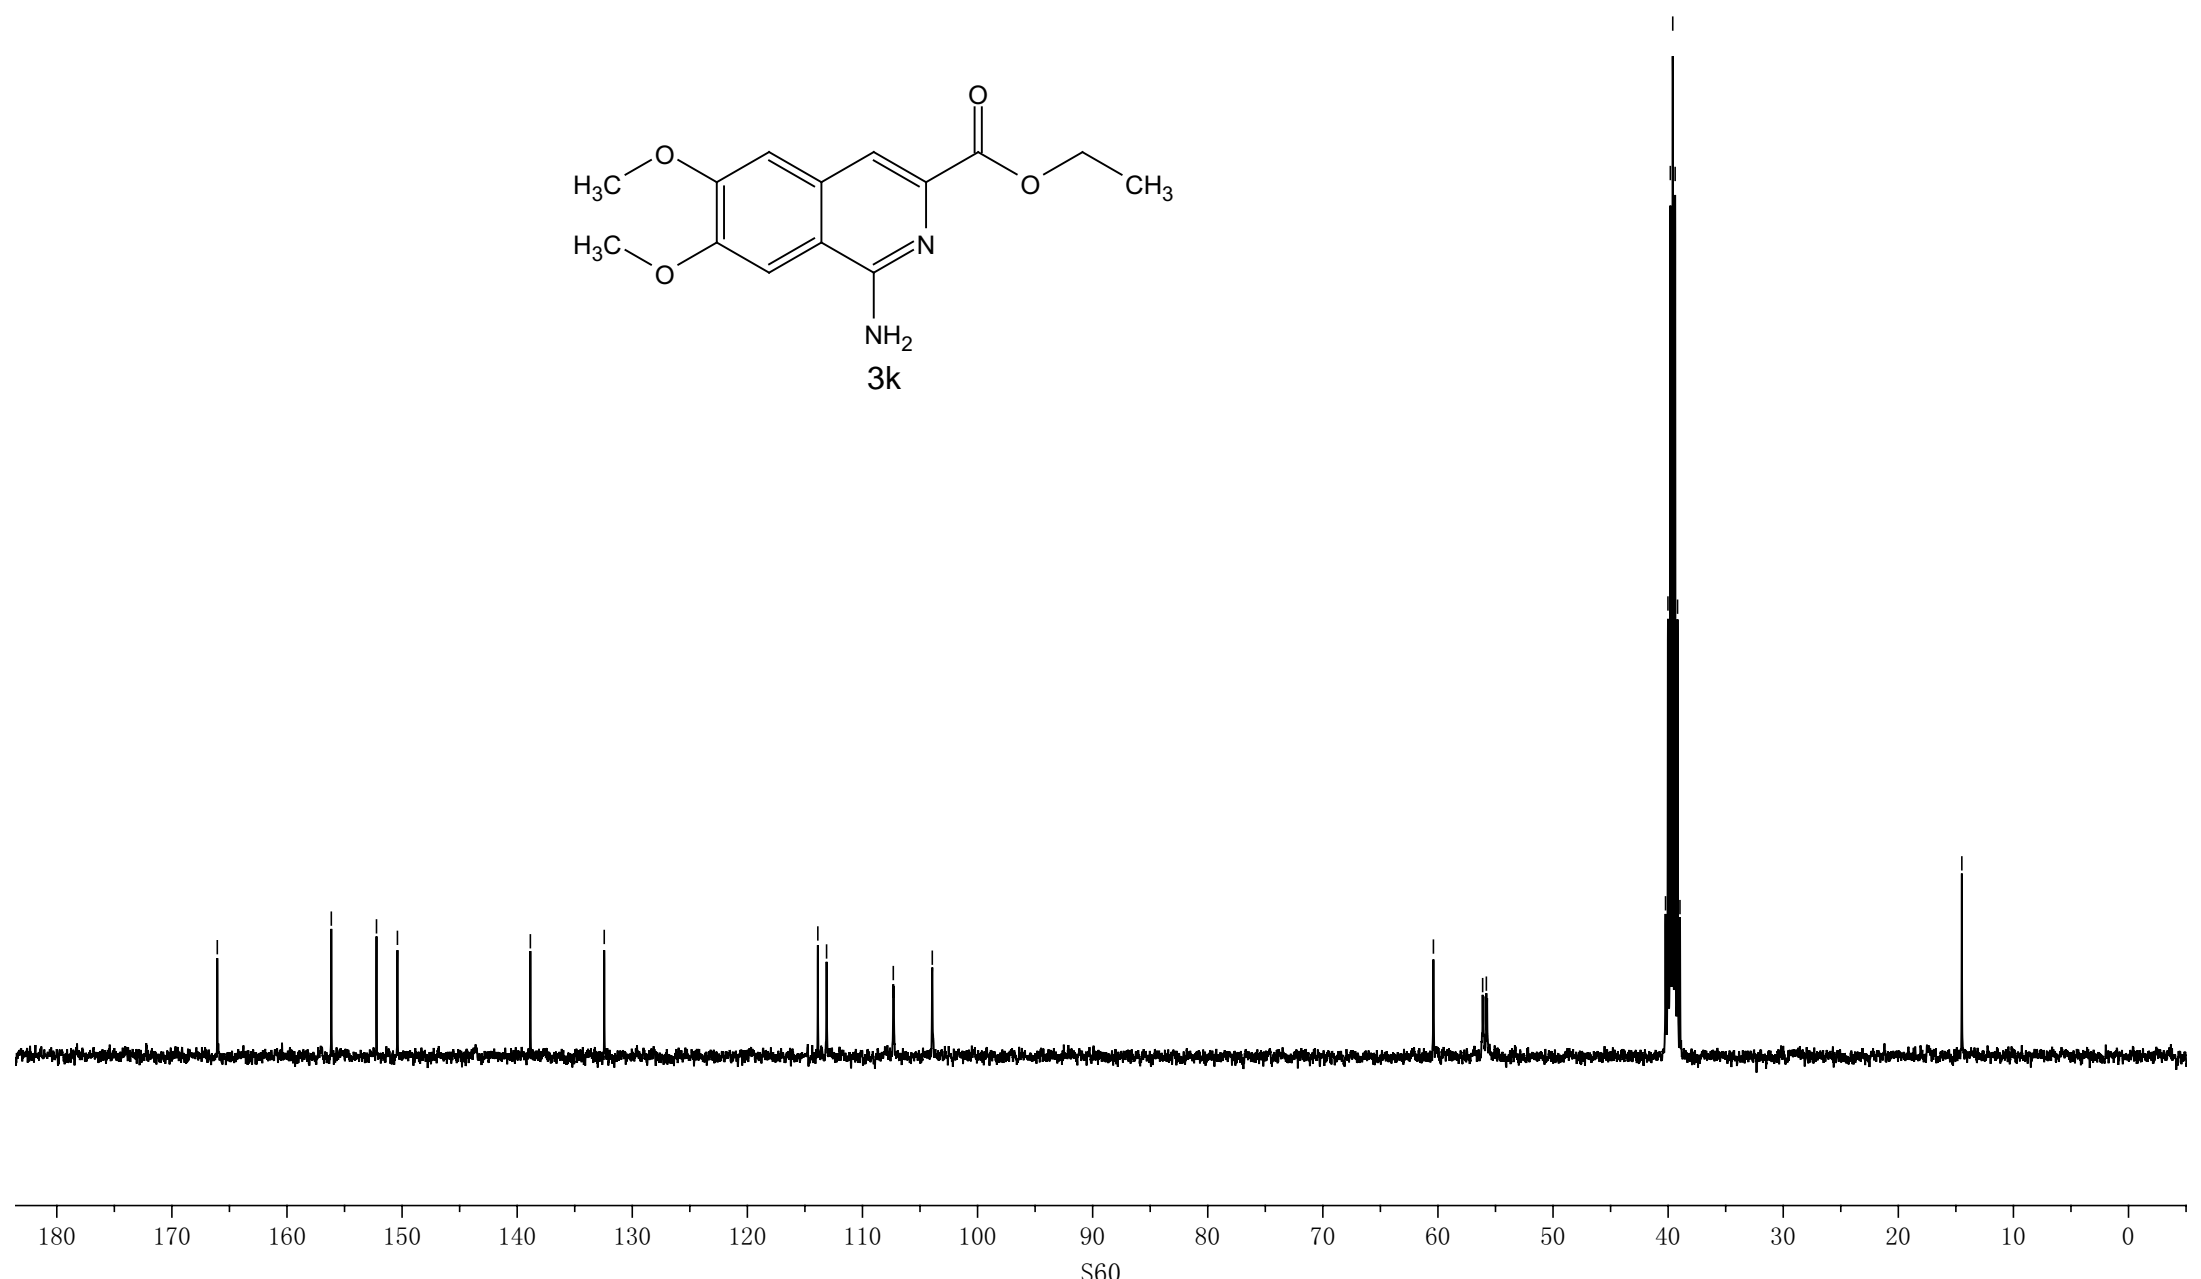

7.685  
7.650

7.347

6.819

6.182

4.305  
4.287  
4.269  
4.252

2.500

1.318  
1.300  
1.282

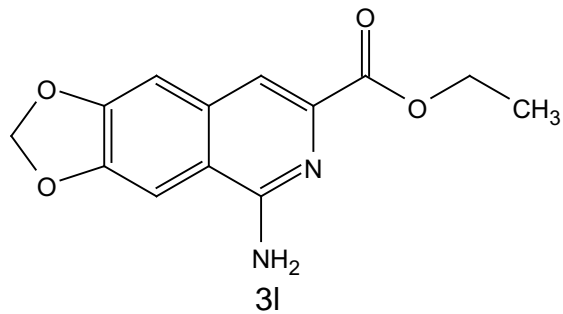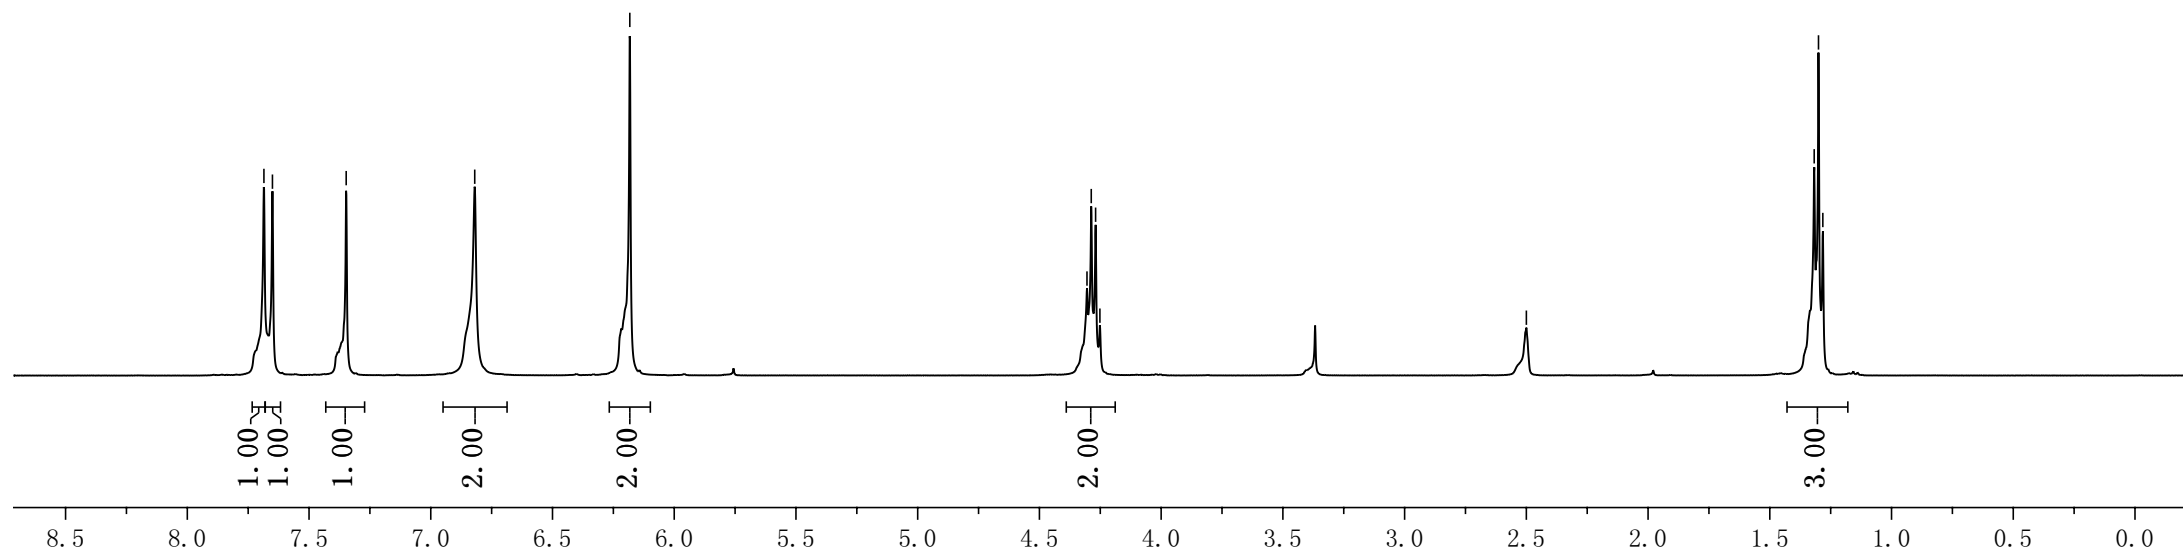

—165.942

—156.456

~150.367

~148.843

—139.295

—134.230

~115.008

~113.514

~104.472

~102.102

~100.988

—60.472

40.226

40.017

39.809

39.600

39.392

39.183

38.974

—14.474

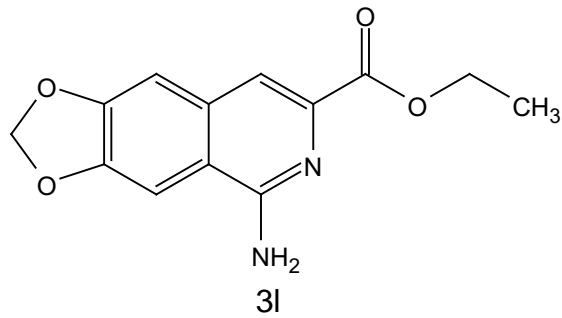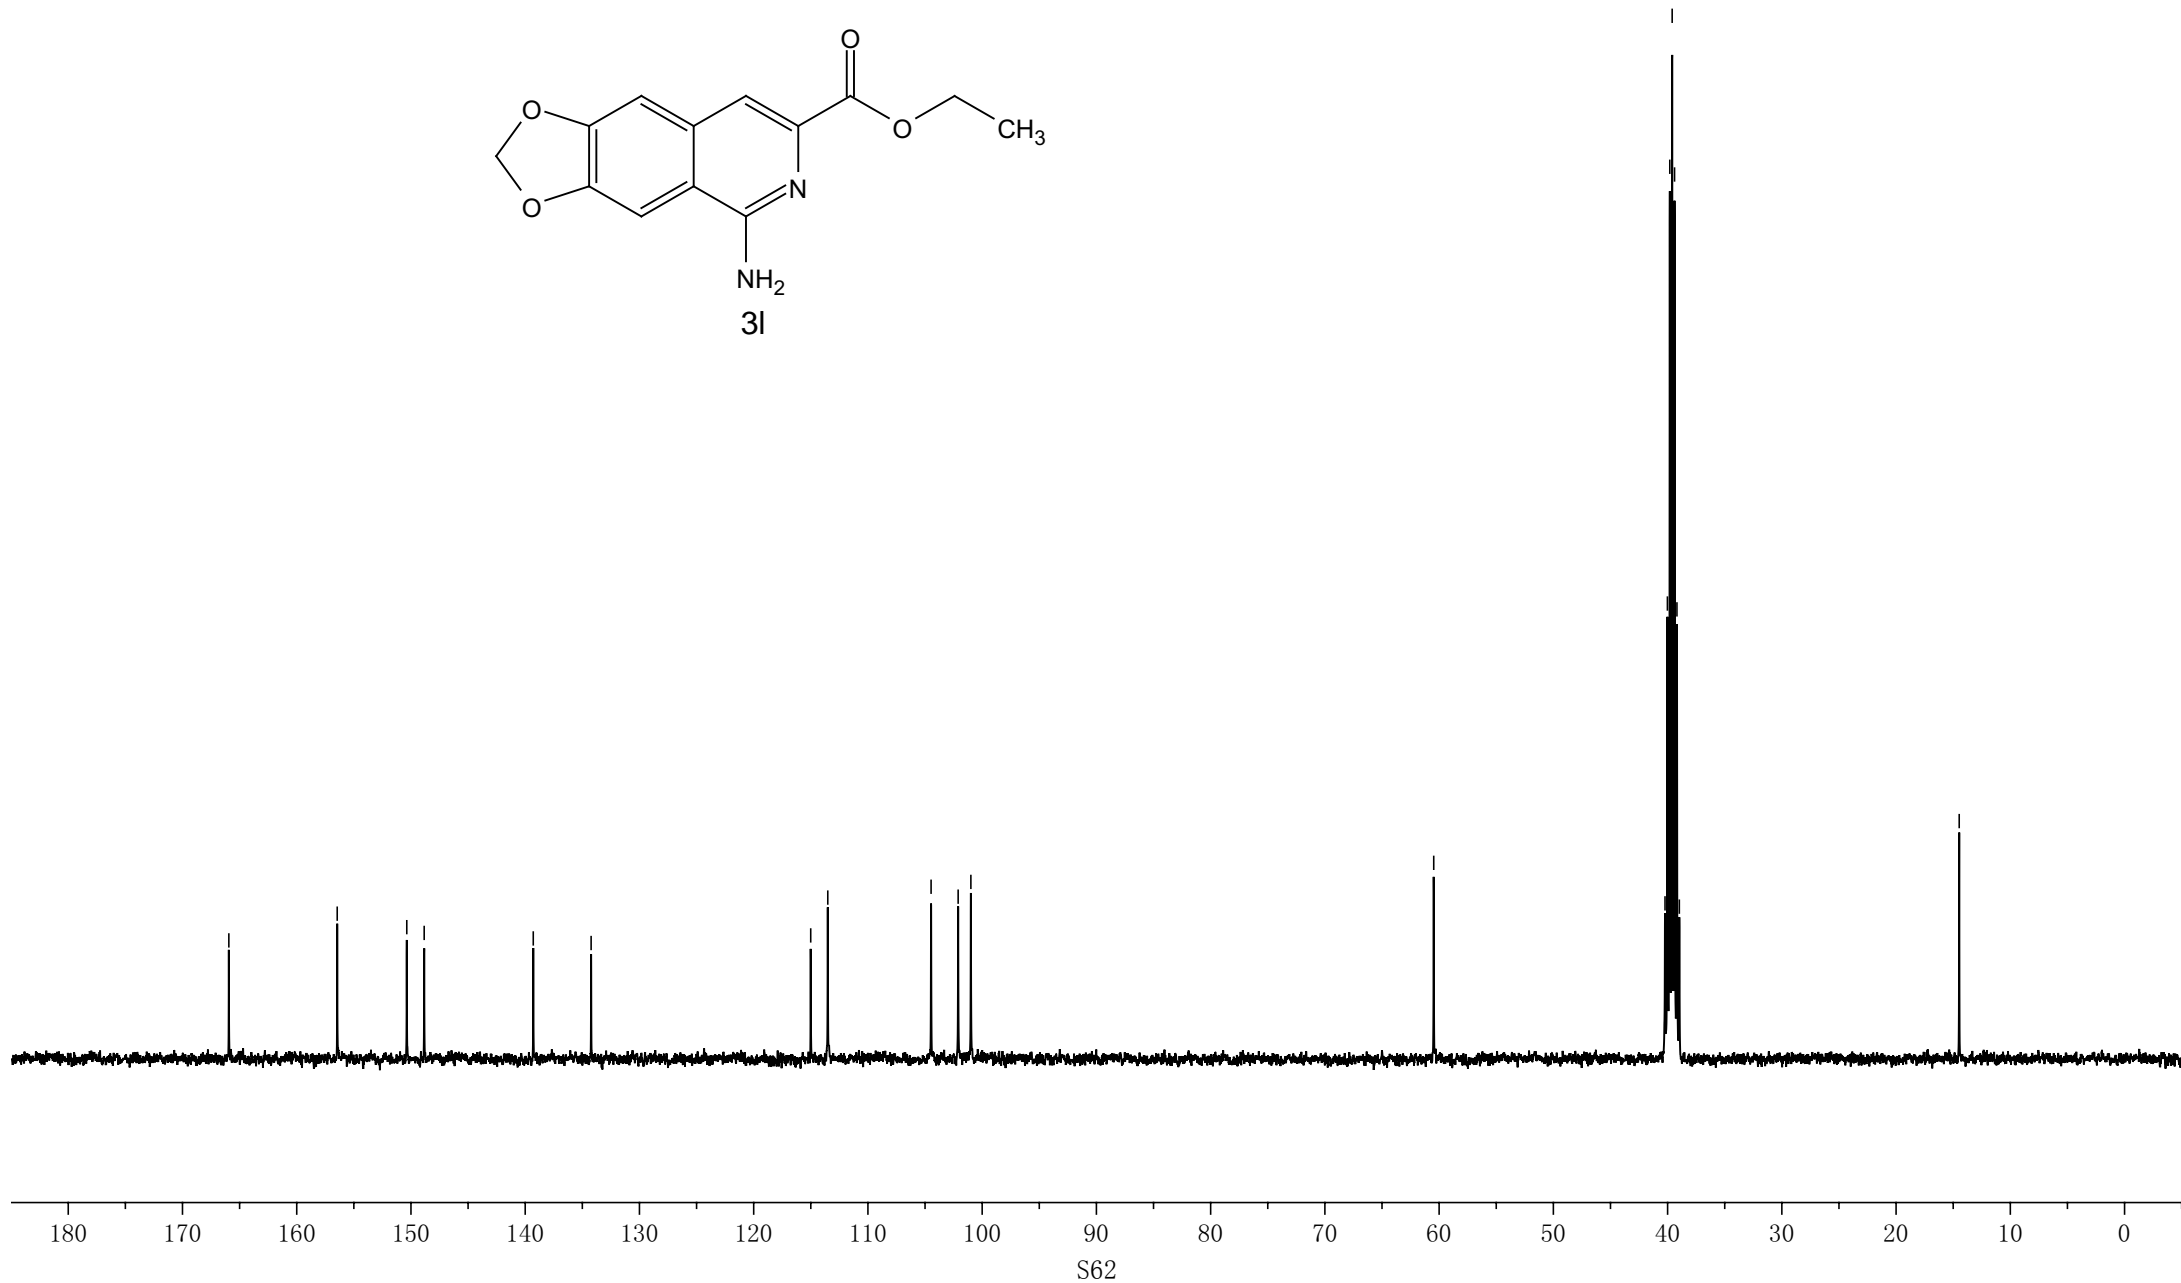

8.646  
8.010  
8.007  
7.988  
7.985  
7.968  
7.947  
7.868  
7.850  
7.795  
7.510  
7.491  
7.471  
7.402  
7.383  
7.380  
7.367

4.331  
4.313

2.504  
2.500  
2.496

1.339  
1.321  
1.304

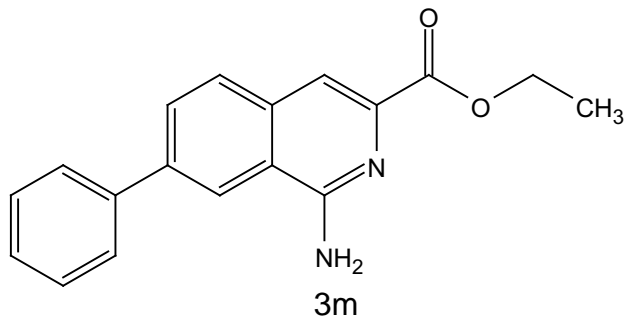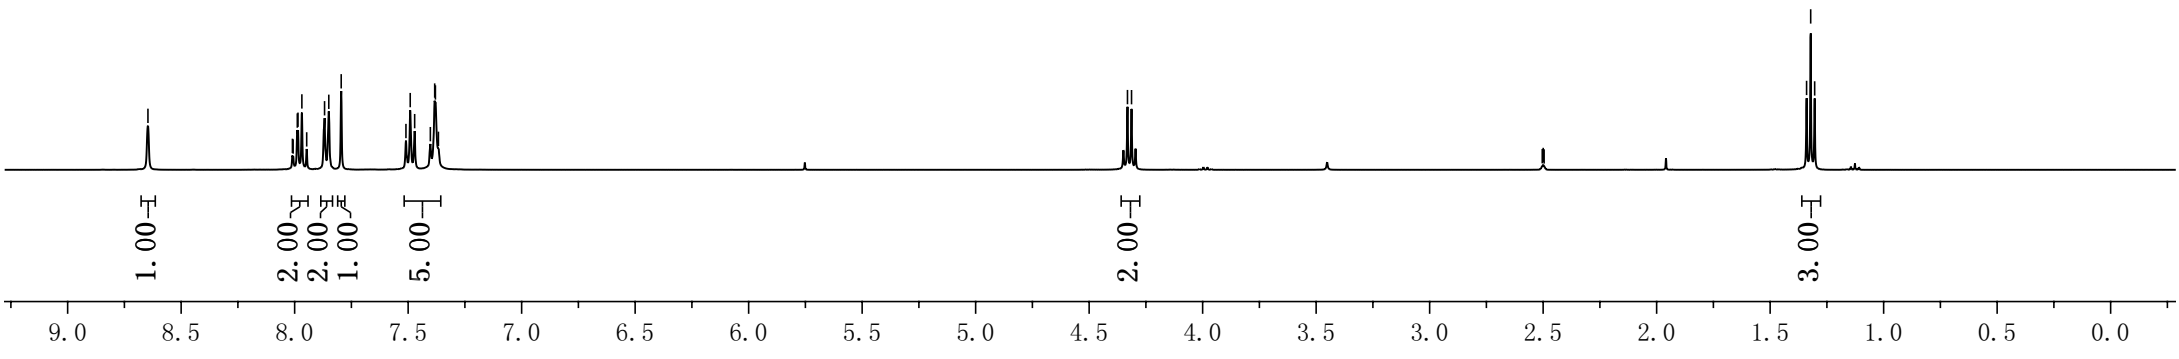

—165.902

—157.759

140.552

139.597

139.396

135.657

129.260

129.112

128.905

128.013

127.190

124.730

113.016

—60.669

40.017

39.809

39.600

39.391

39.182

—14.465

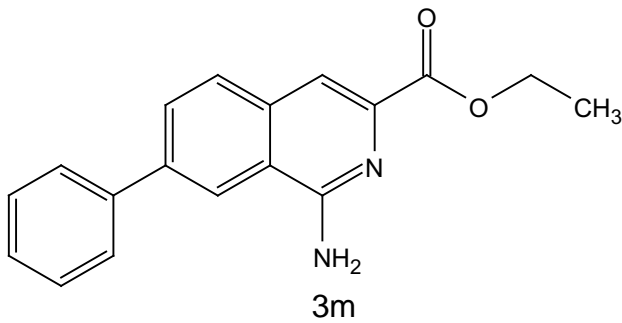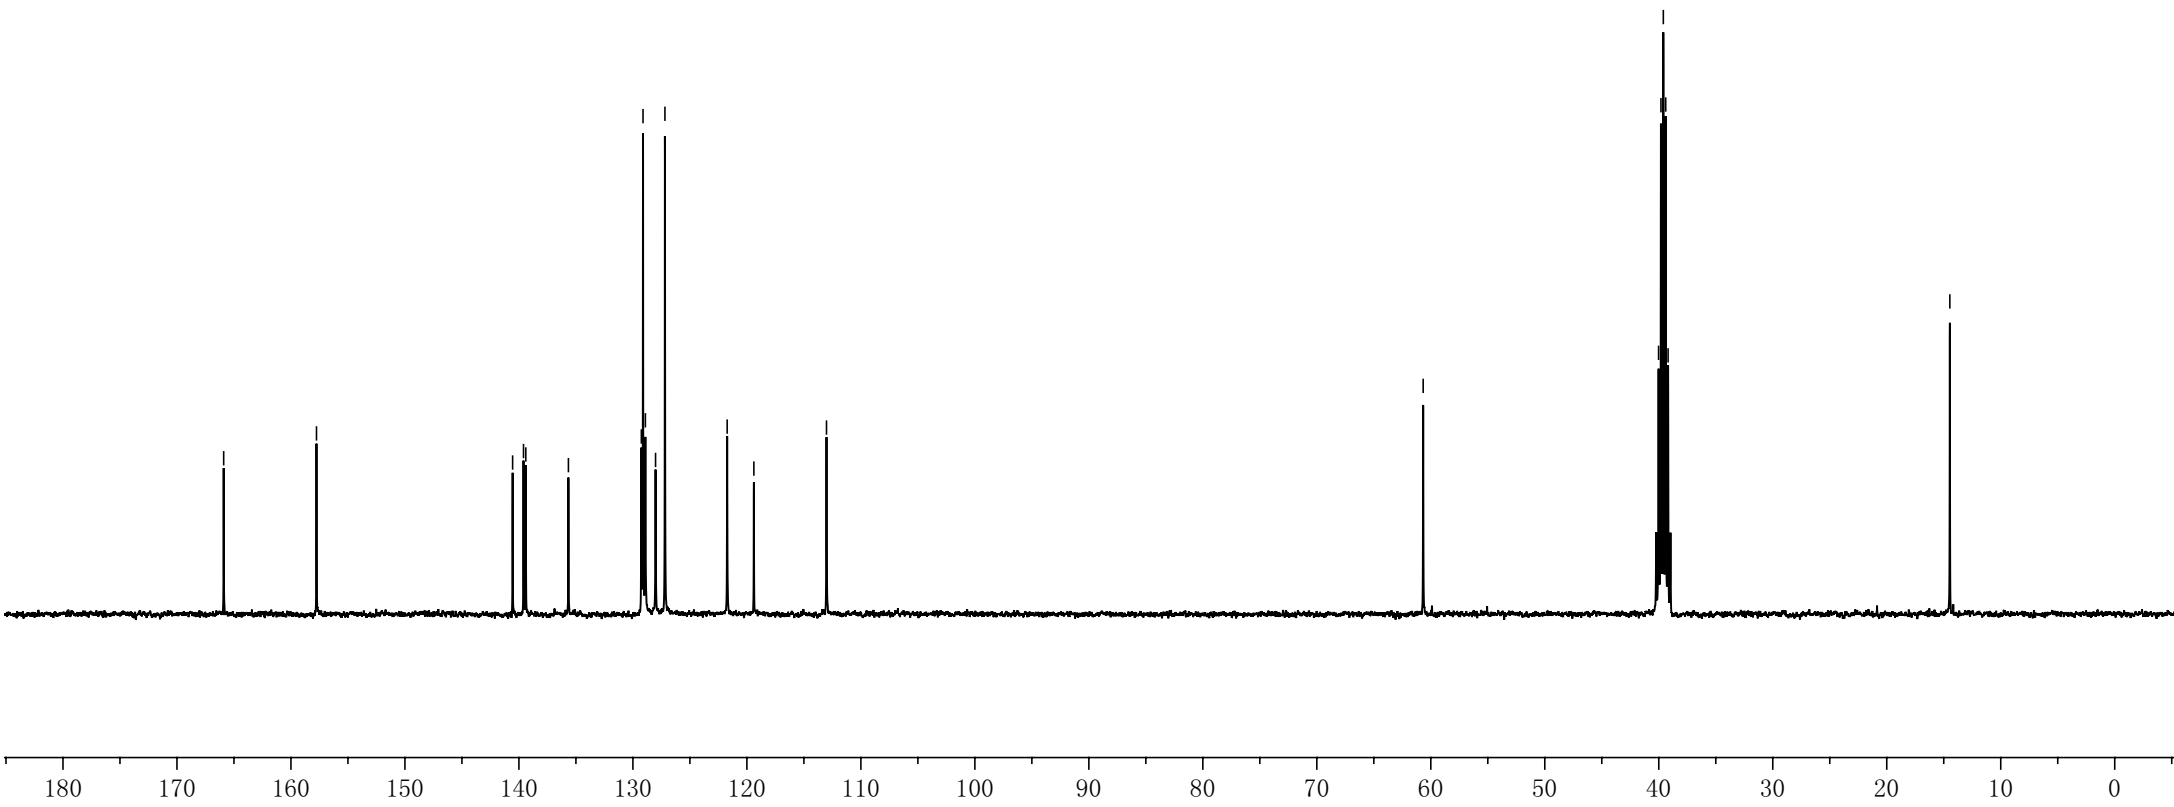



8.767  
8.445  
8.238  
8.235  
8.217  
8.213  
8.111  
8.107  
8.090  
8.086  
8.078  
8.054  
8.032  
8.010  
7.983  
7.965  
7.961  
7.804  
7.596  
7.583  
7.579  
7.569  
7.564  
7.559  
7.549  
7.546  
4.357  
4.339  
4.321  
4.304

2.509  
2.504  
2.500  
2.495  
2.491

1.359  
1.342  
1.324

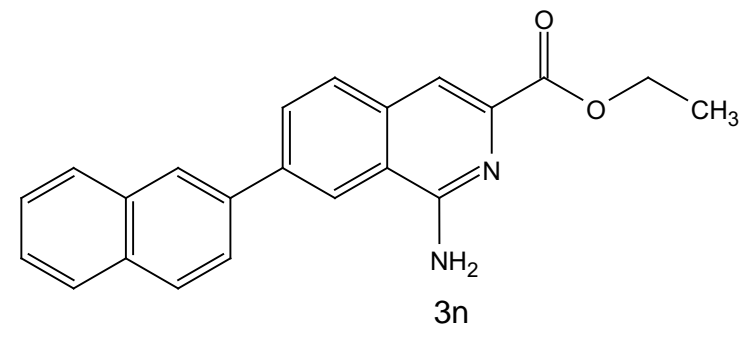

1.00  
1.00  
1.00  
2.00  
2.00  
1.00  
1.00  
2.00  
2.00

2.00

3.00

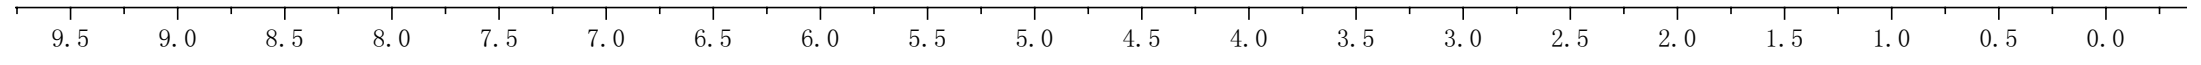

—165.796

—157.651

139.293

136.628

135.675

133.400

132.537

129.430

128.936

128.629

128.349

127.637

126.653

125.880

125.282

124.936

—60.608

40.226

40.018

39.809

39.600

39.391

39.183

38.974

—14.432

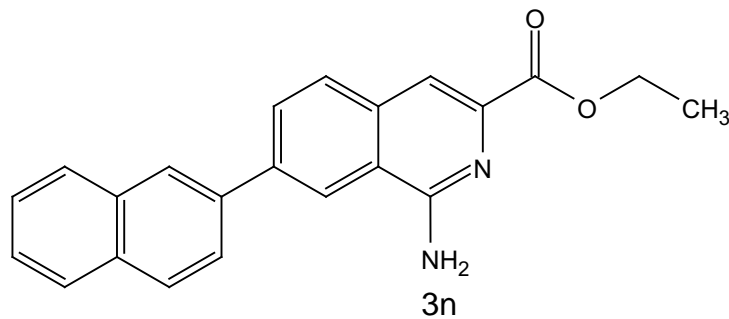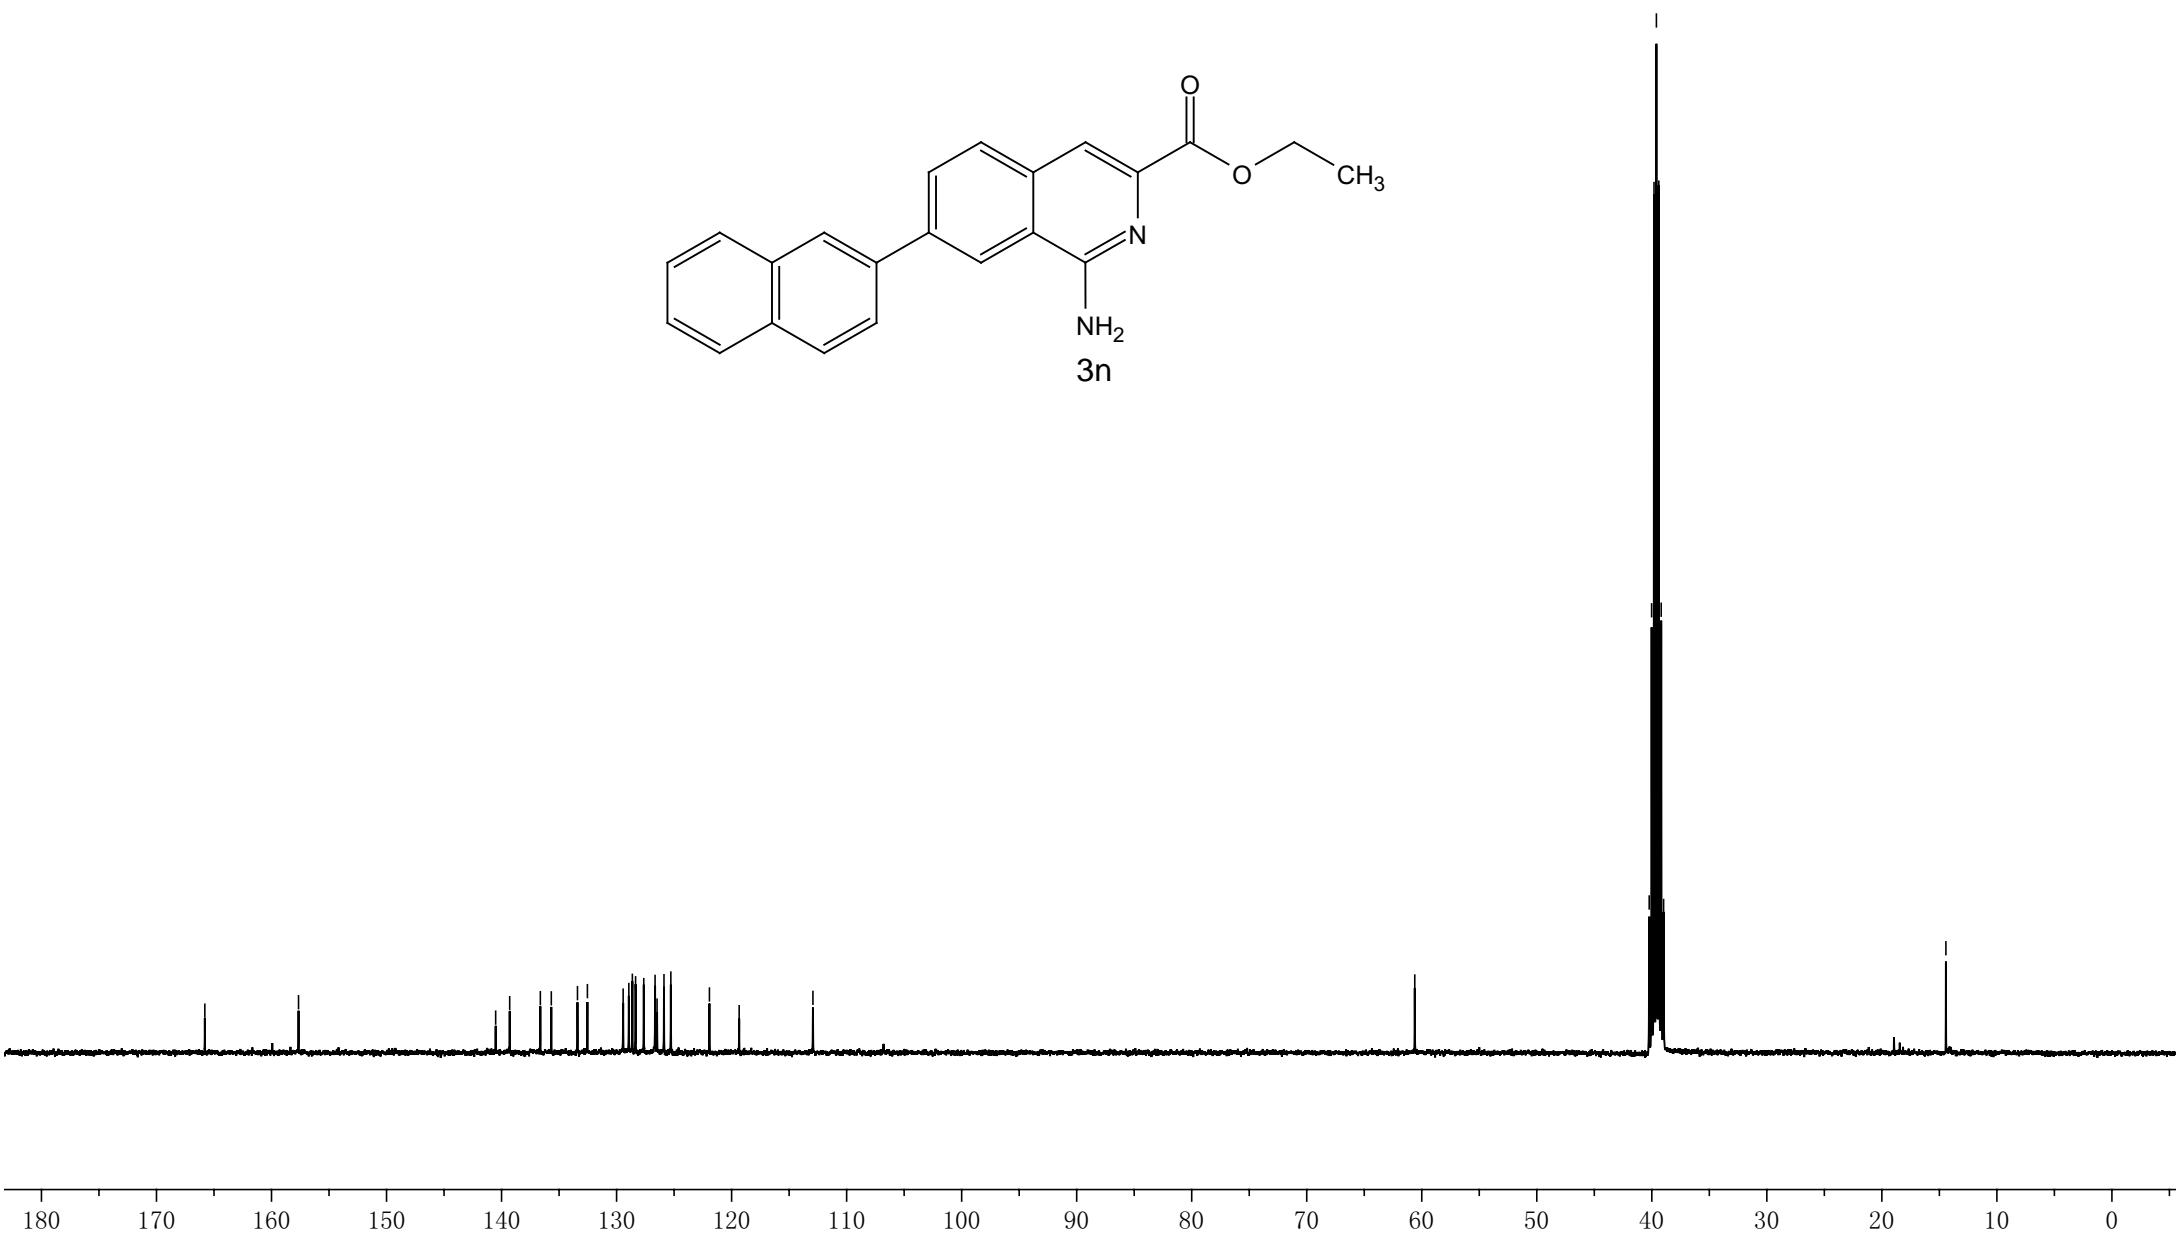

8.280  
8.260  
7.914  
7.894  
7.760  
7.694  
7.631  
7.613  
7.599

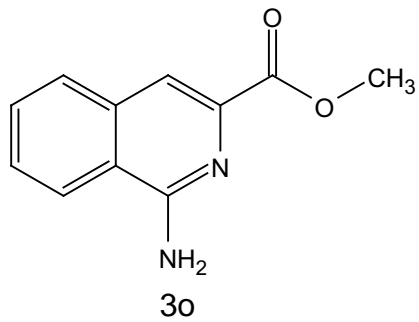

3.836

2.504  
2.500  
2.496

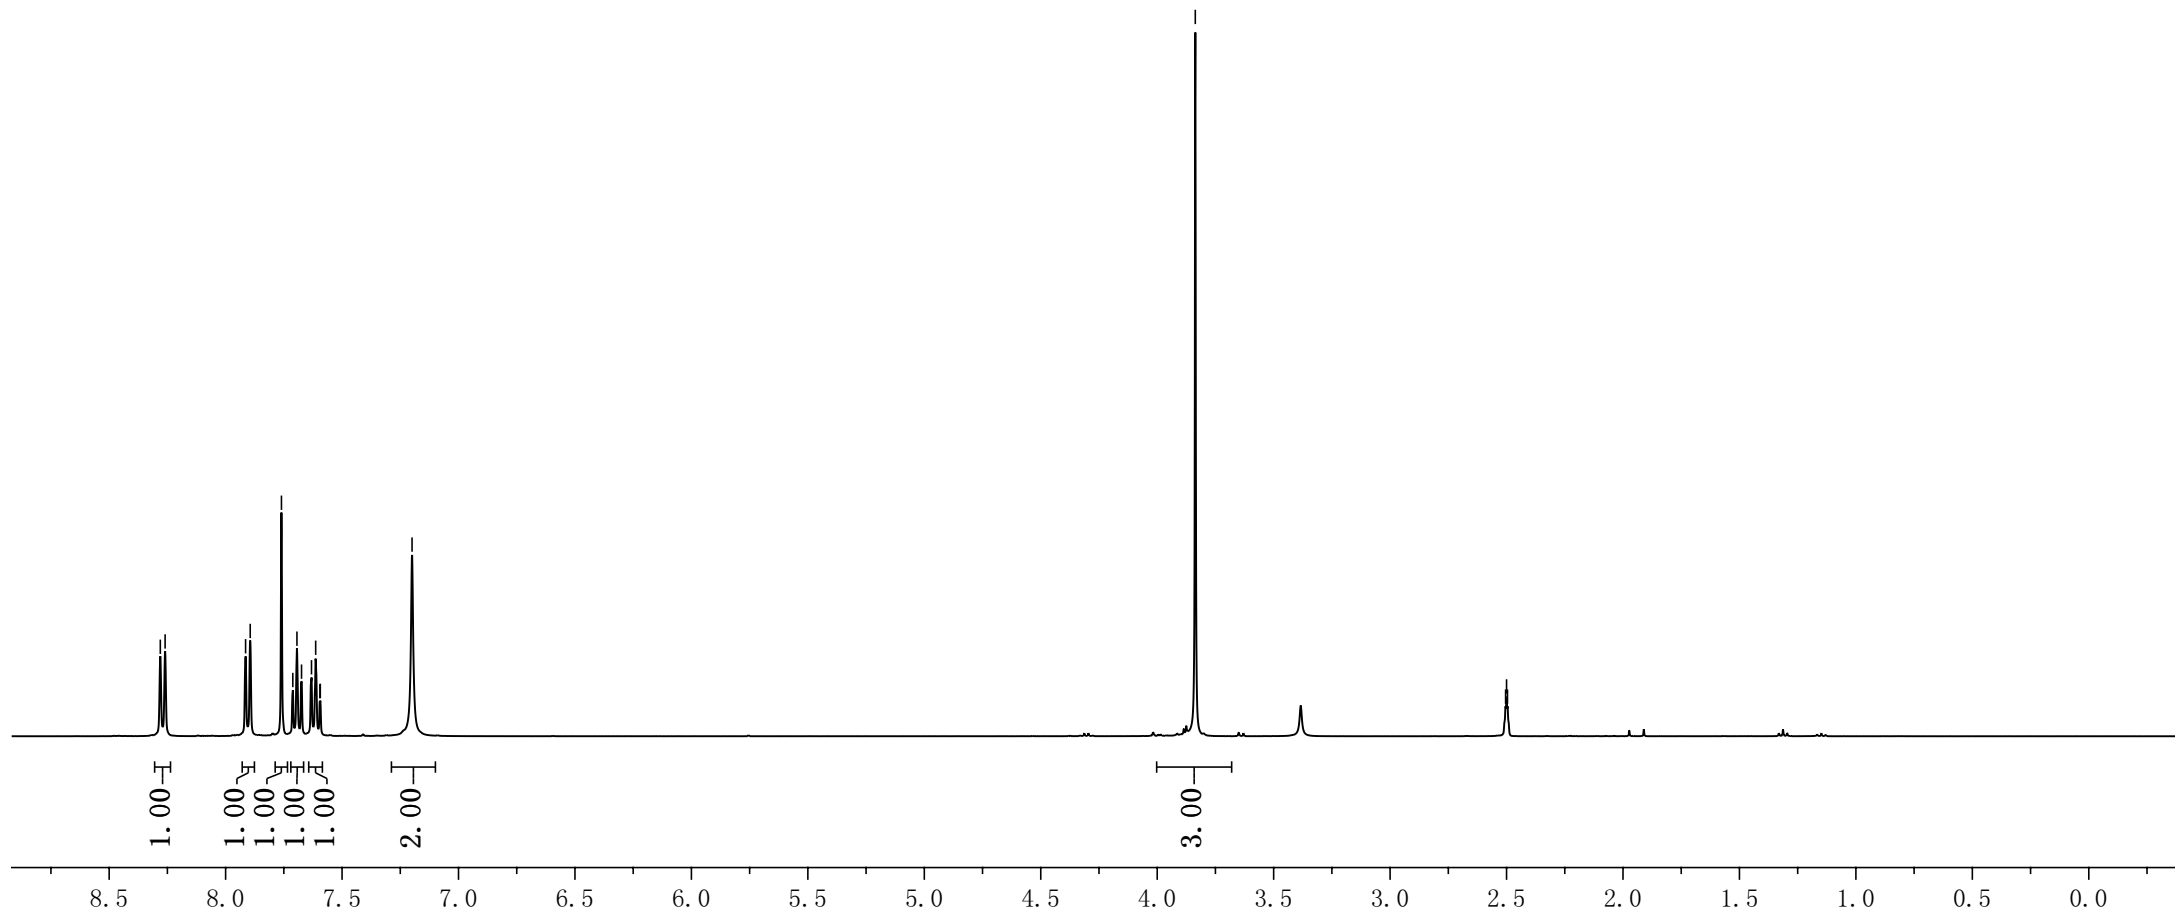

—166.375

—157.472

—140.191

—136.466

—130.647

—128.224

—128.053

—124.117

—118.978

—113.324

—51.973

—40.226

—40.017

—39.809

—39.600

—39.392

—39.183

—38.975

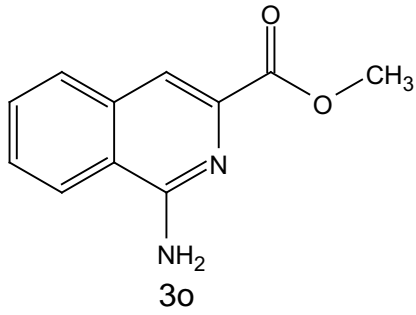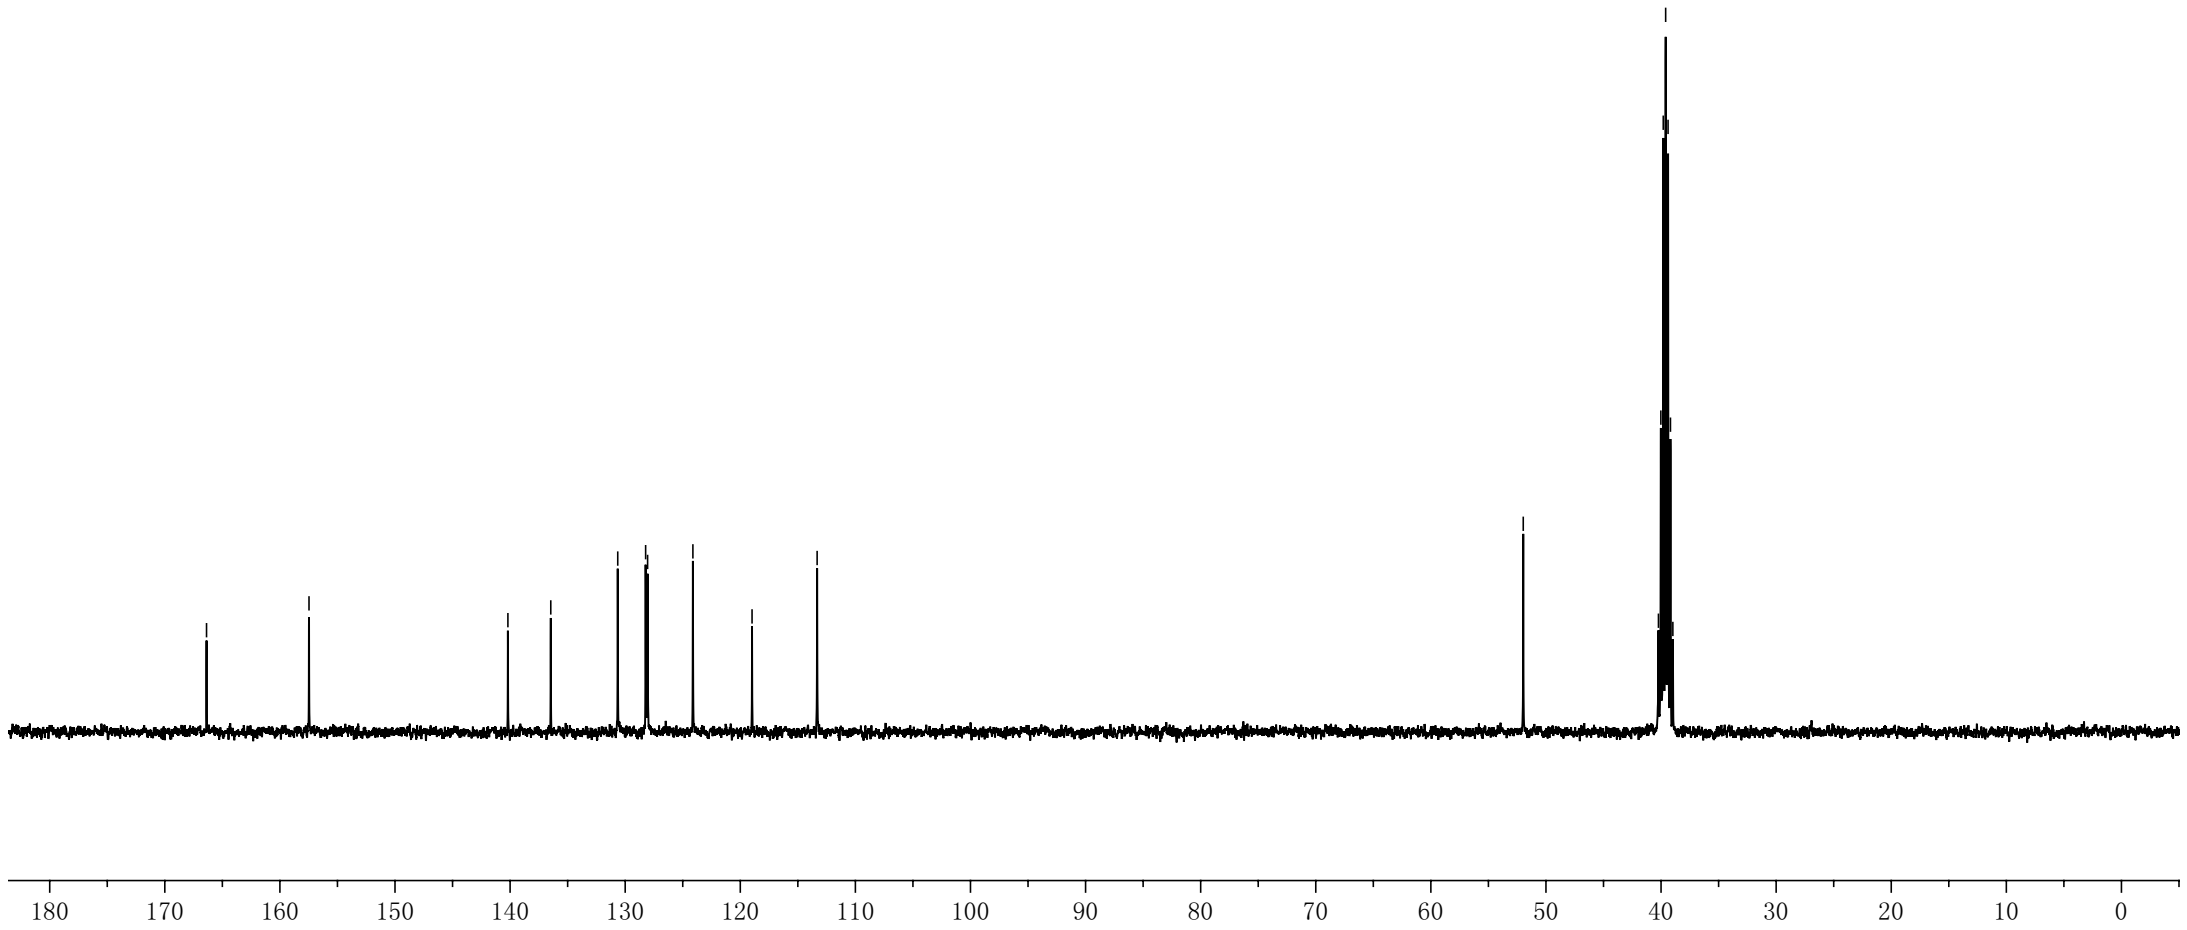

8.299  
8.277  
8.025  
8.019  
7.712  
7.636  
7.630  
7.585

3.837

2.504  
2.500  
2.495

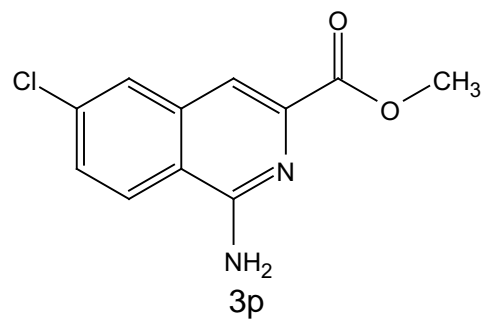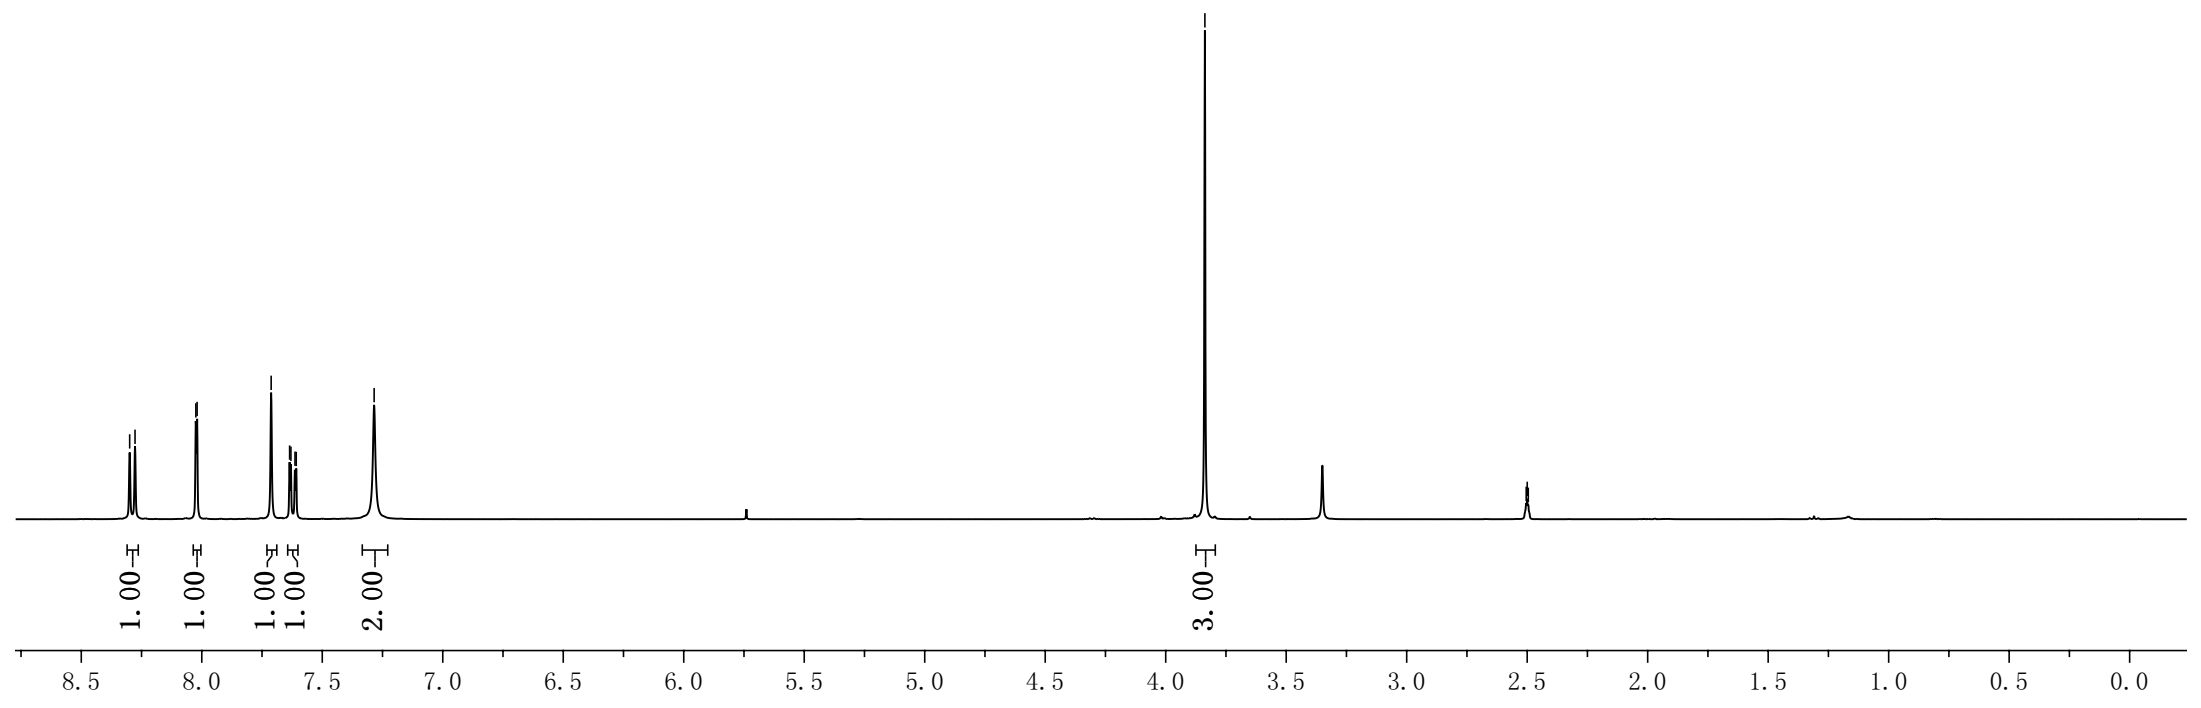

—166.064

—157.386

—141.494

—137.894

—135.461

—128.090

—126.810

—126.457

—117.190

—112.169

—52.003

—40.226

—40.018

—39.809

—39.600

—39.391

—39.182

—38.973

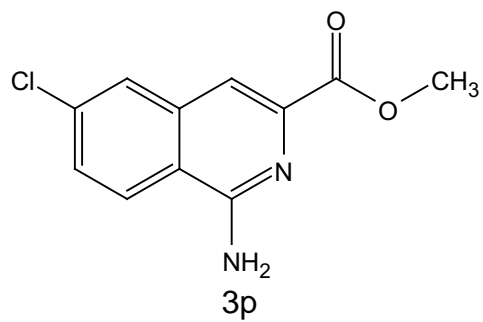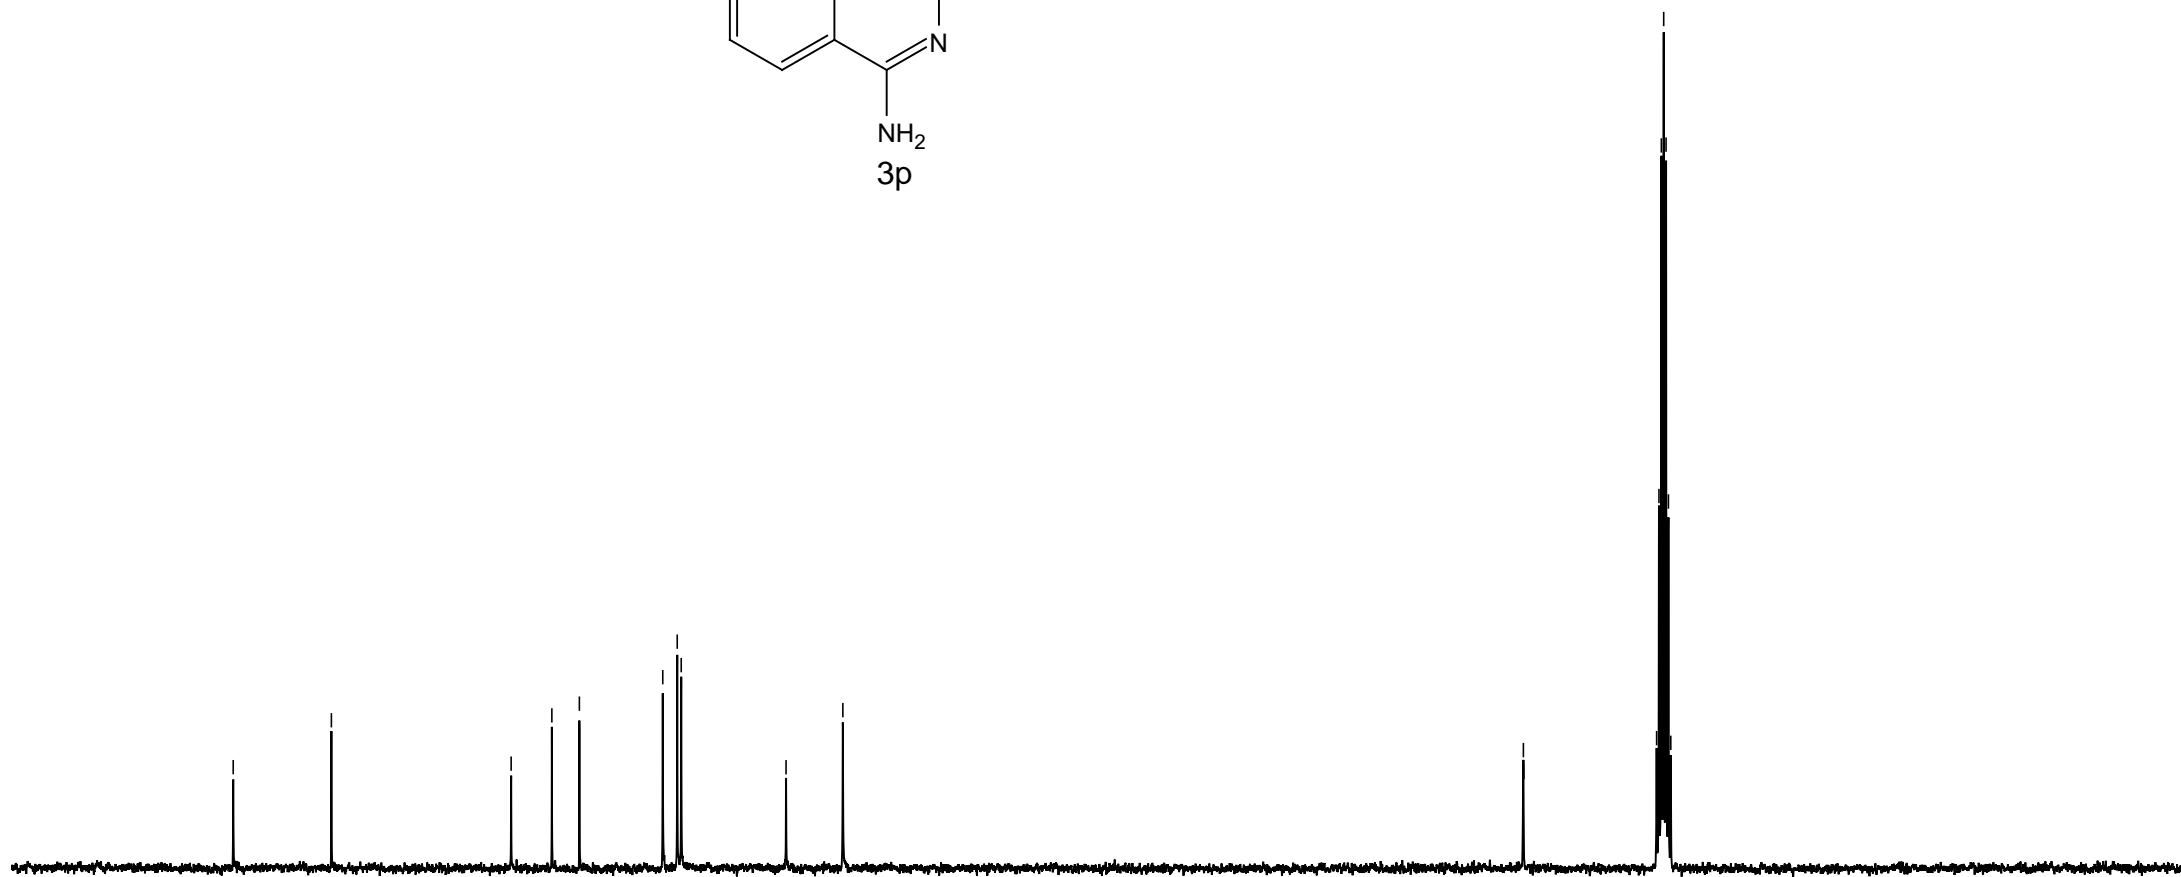

180

170

160

150

140

130

120

110

100

90

80

70

60

50

40

30

20

10

0

S70

7.839  
7.817  
7.742  
7.681  
7.675  
7.343  
7.337

3.895  
3.826

2.509  
2.504  
2.500  
2.496  
2.492

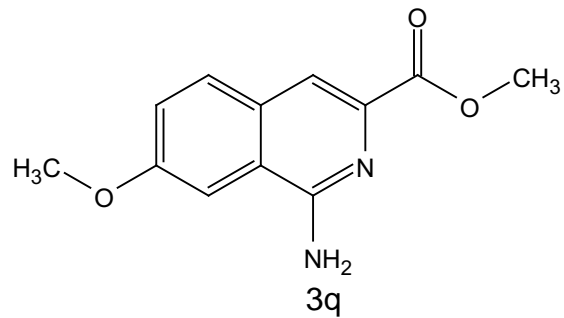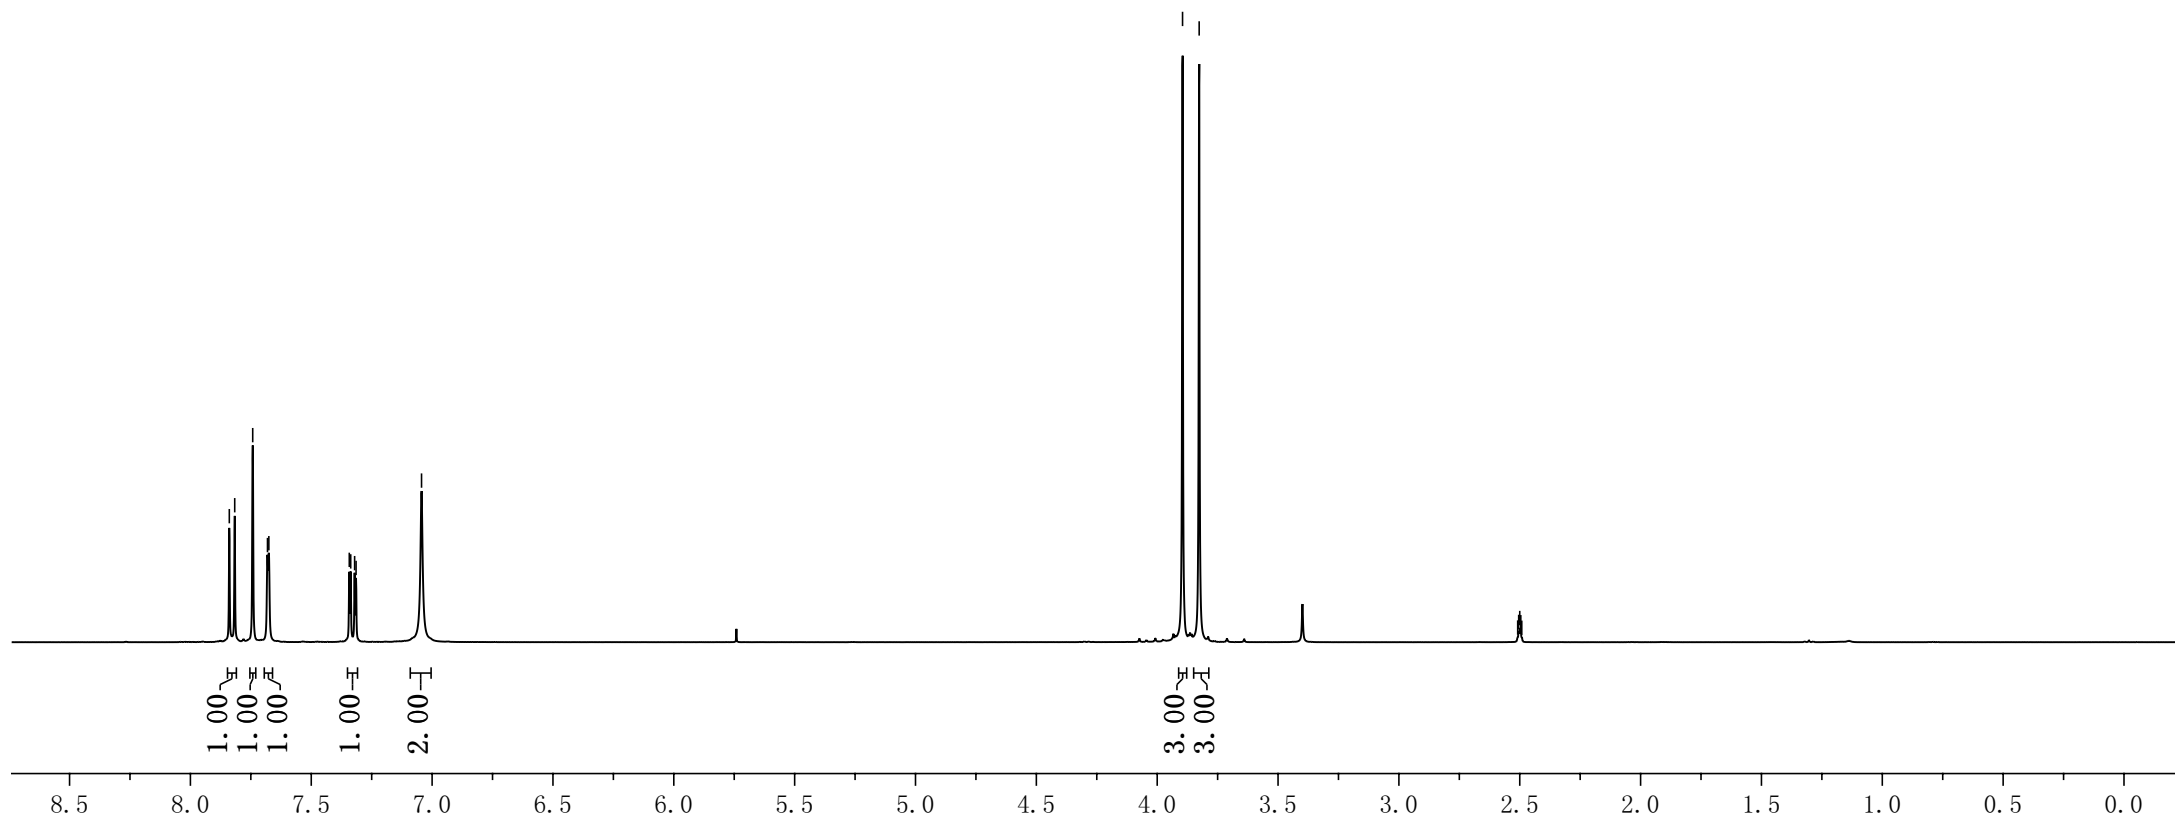

—166.454

—159.279

—156.518

—137.972

—131.063

—129.880

—121.914

—120.303

—113.603

—103.978

—55.828

—51.756

40.227

40.018

39.809

39.600

39.392

39.183

38.974

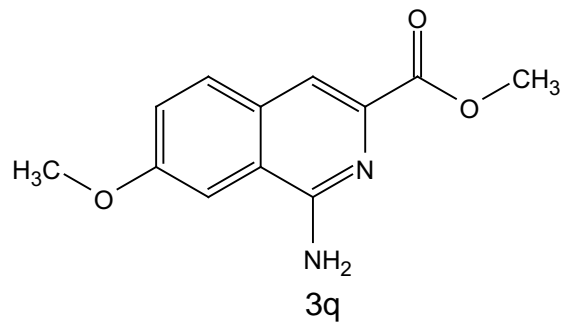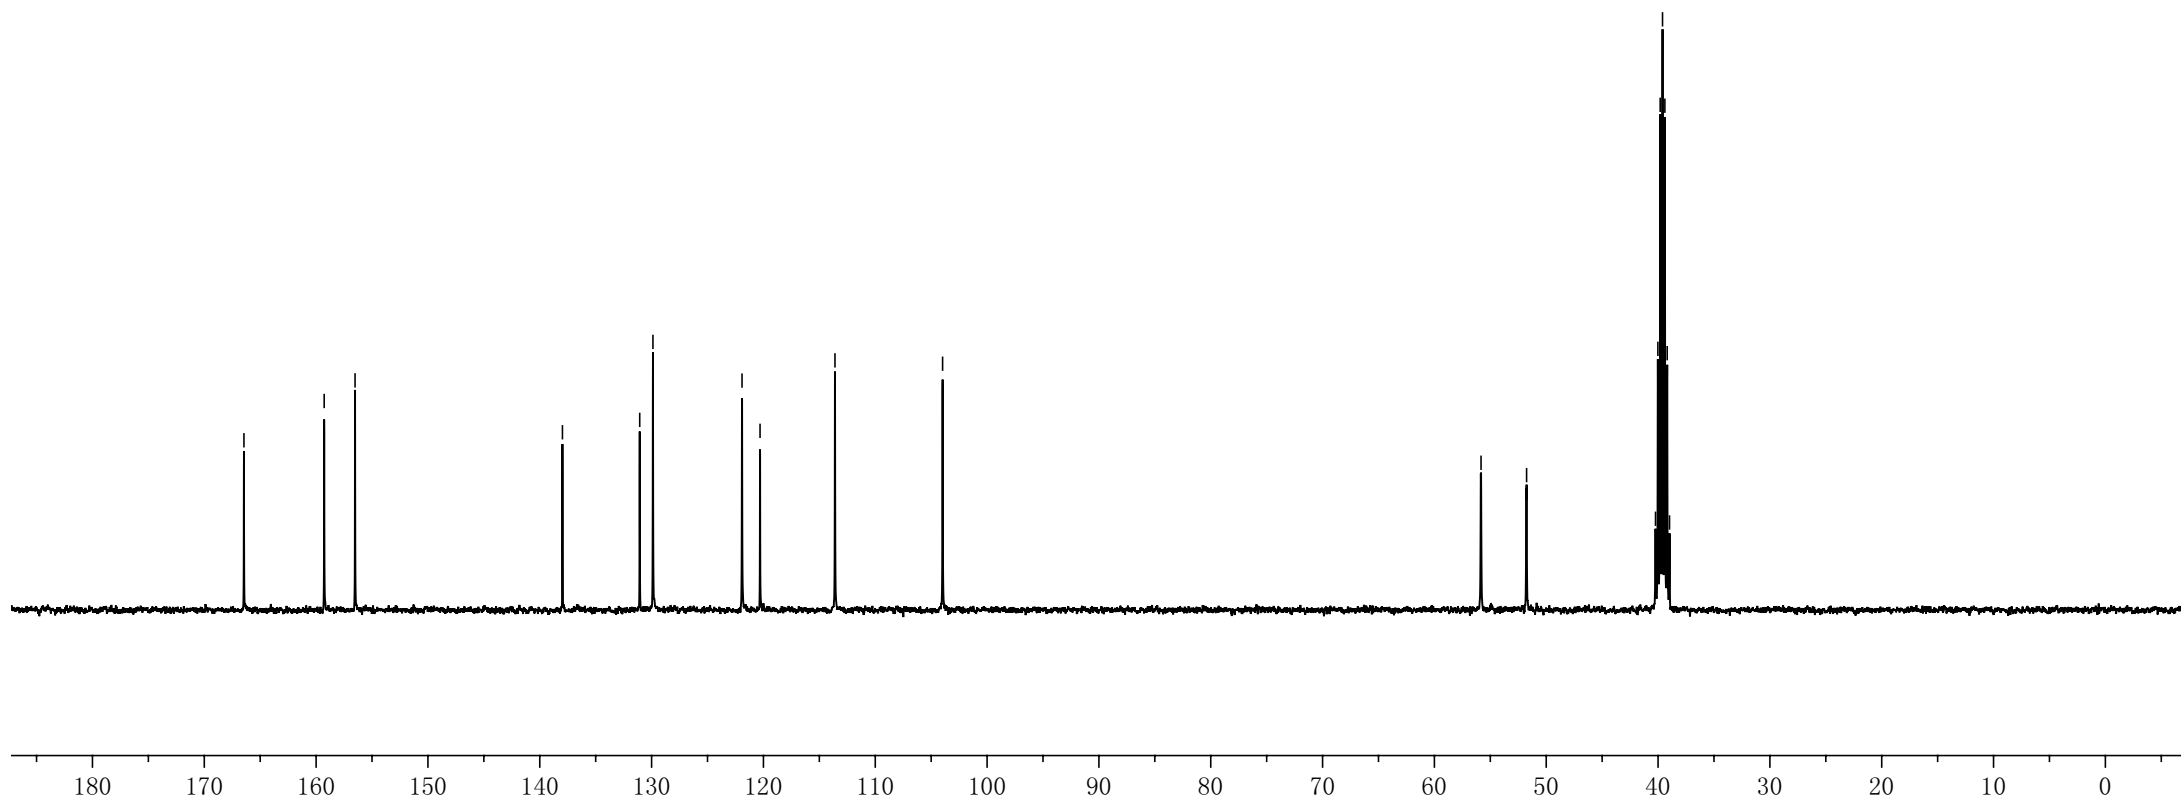



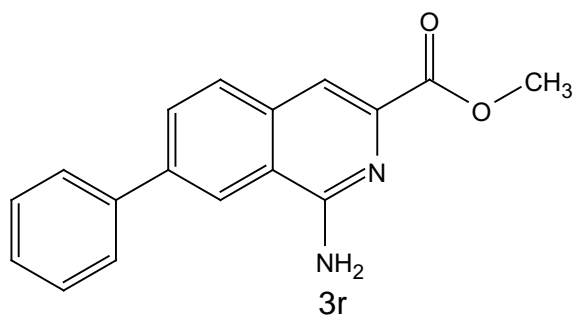

8.004  
7.944  
7.941  
7.923  
7.906  
7.885  
7.676  
7.673  
7.655  
7.509  
7.490  
7.471  
7.430  
7.428  
7.425  
7.410  
7.404  
7.393  
7.391  
7.260

5.681

3.999

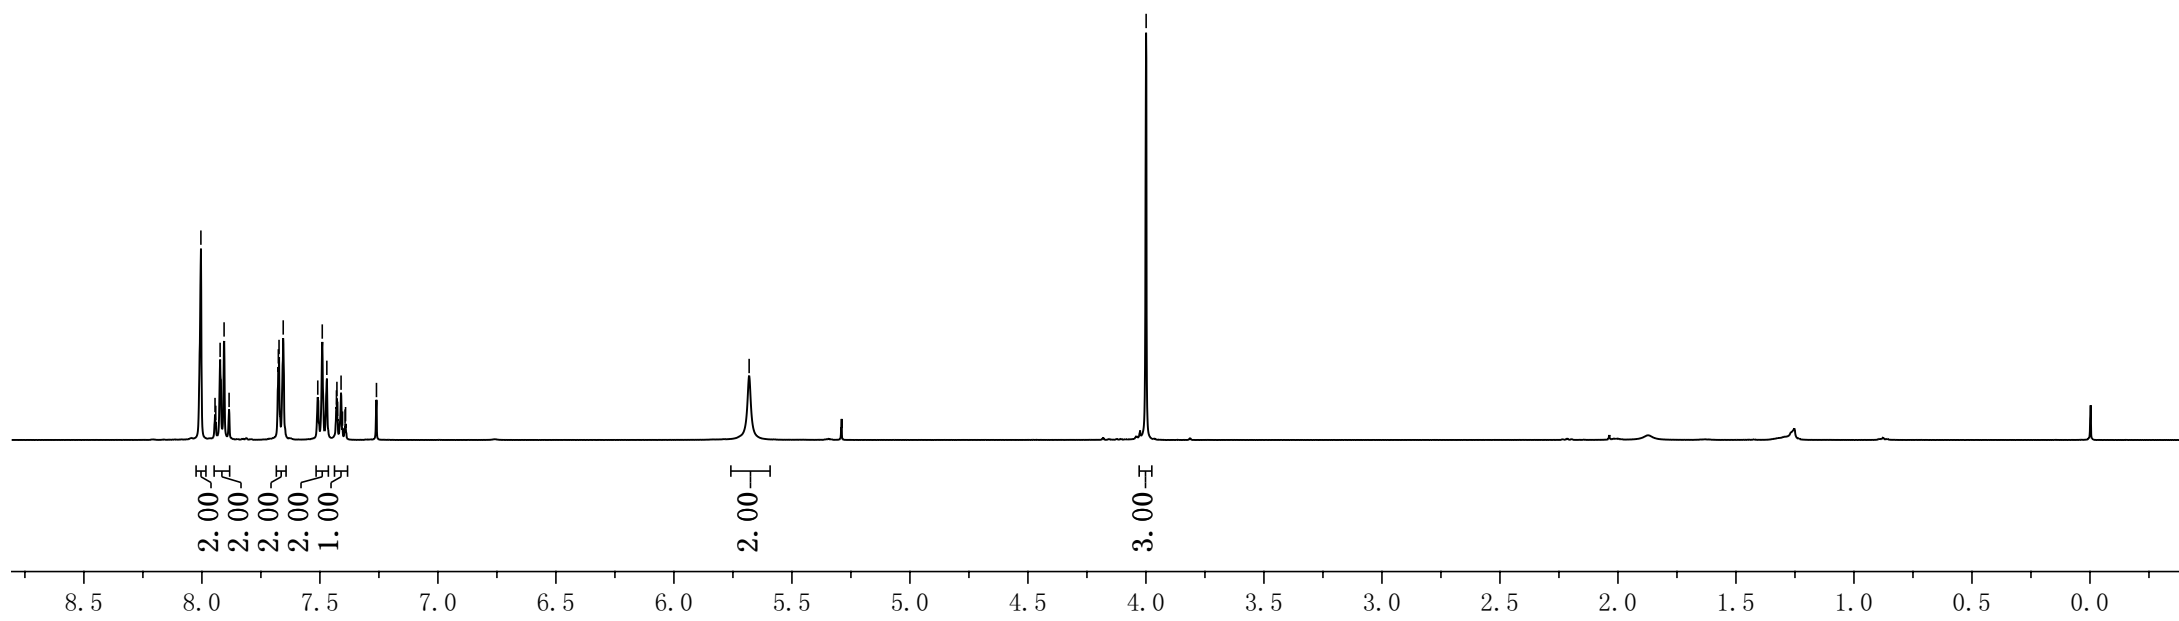

—166.535

—156.599

141.372

140.018

139.544

135.694

130.163

128.967

127.956

127.309

120.834

119.739

115.735

77.318

77.000

76.682

53.372

52.526

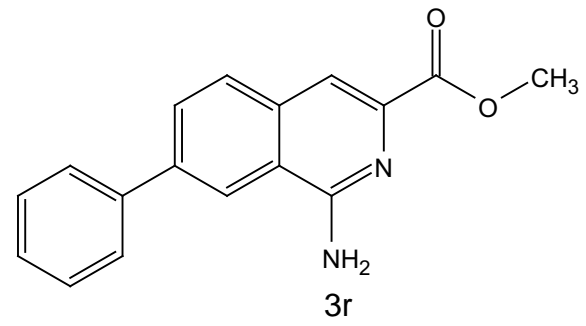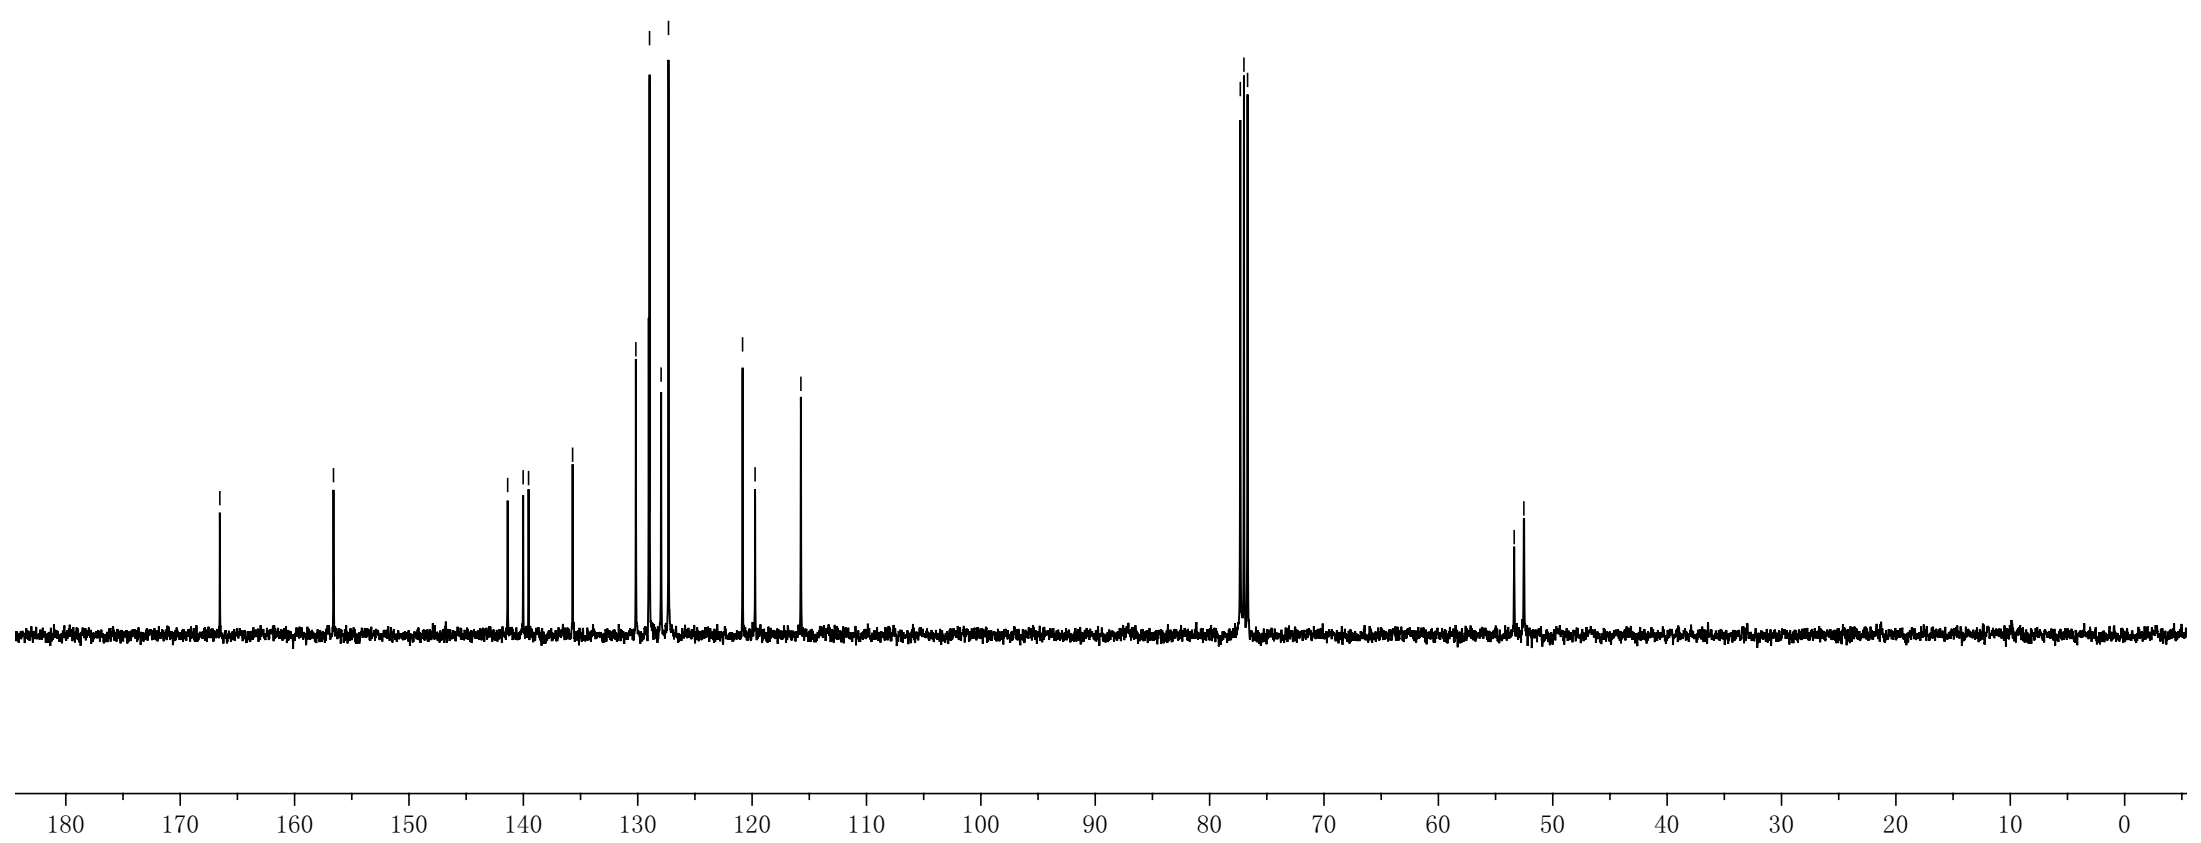

7.864  
7.849  
7.845  
7.842  
7.828  
7.825  
7.823  
7.686  
7.683  
7.665

5.363

1.650

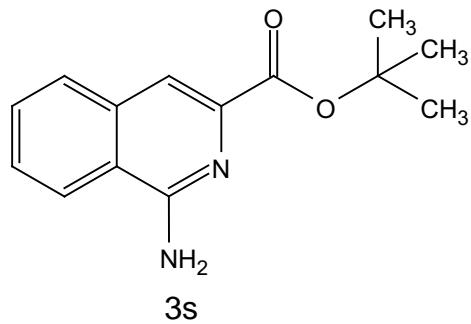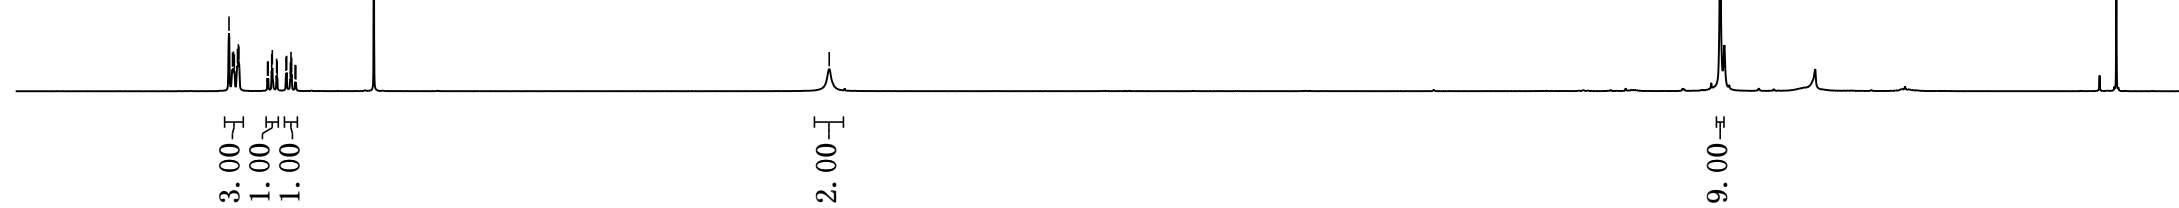

8.5 8.0 7.5 7.0 6.5 6.0 5.5 5.0 4.5 4.0 3.5 3.0 2.5 2.0 1.5 1.0 0.5 0.0

—164.983

—157.233

—141.764

—136.452

—130.475

—127.976

—127.674

—124.036

—118.678

—112.711

—80.327

40.226

40.017

39.808

39.600

39.391

39.182

38.973

—27.961

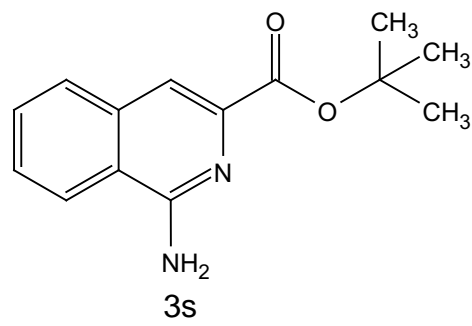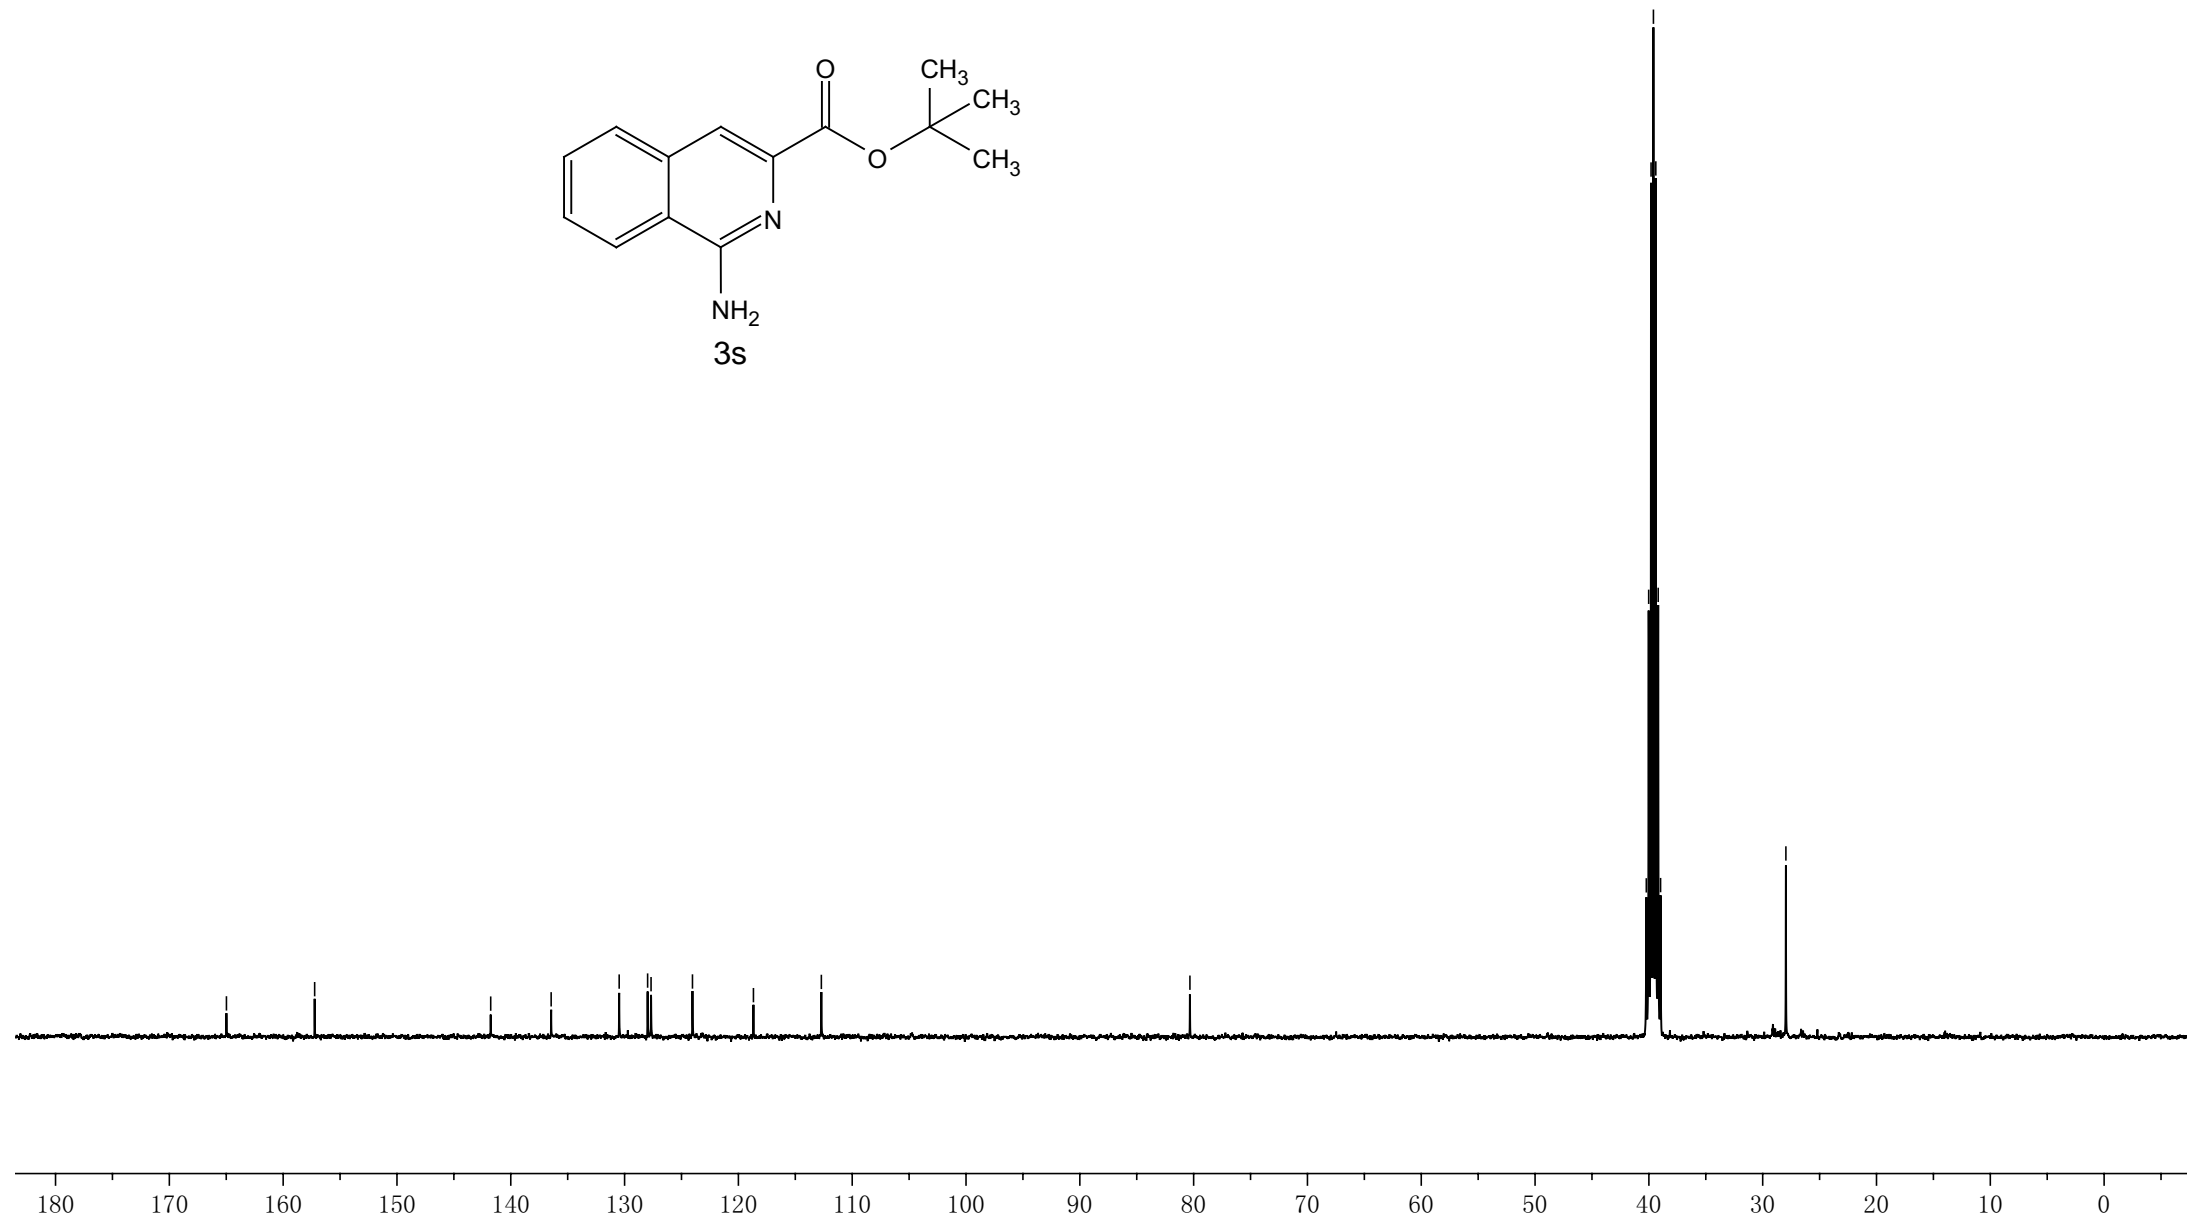

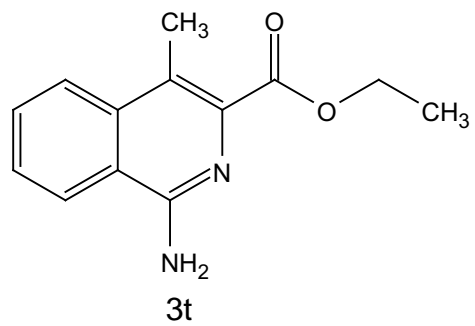

8.045  
8.024  
7.860  
7.840  
7.744  
7.741  
7.723  
7.620  
7.602  
7.589  
7.569

5.119

4.502  
4.484  
4.466  
4.448

2.669

1.464  
1.447  
1.429

0.000

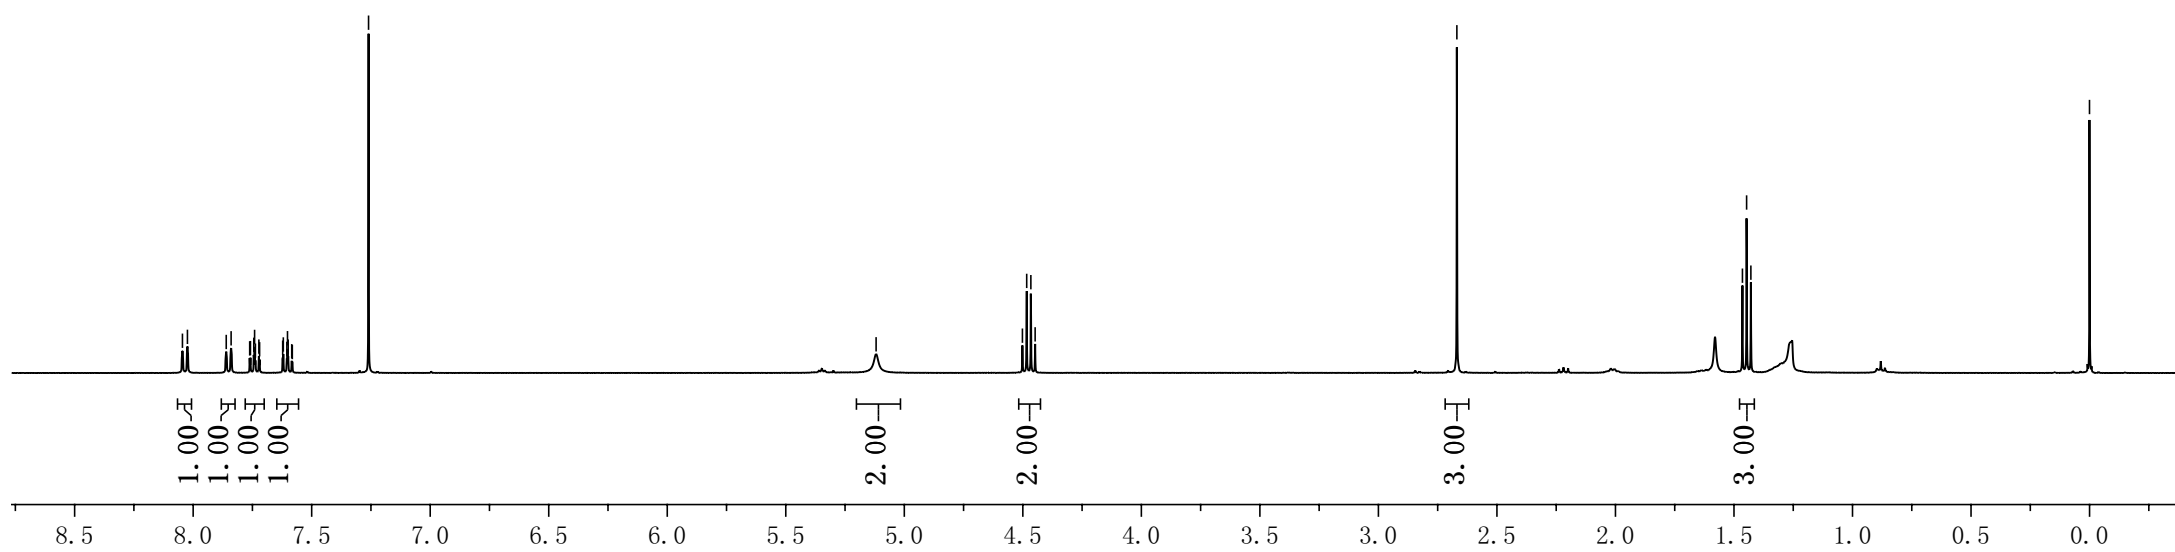

—167.872

—155.573

—141.300

—136.466

130.495

126.585

124.360

124.194

—117.998

—114.109

—60.575

40.227

40.018

39.809

39.600

39.392

39.183

38.974

14.267

13.245

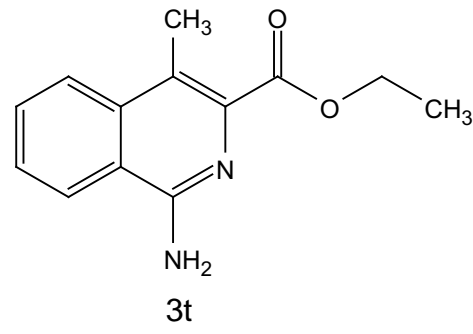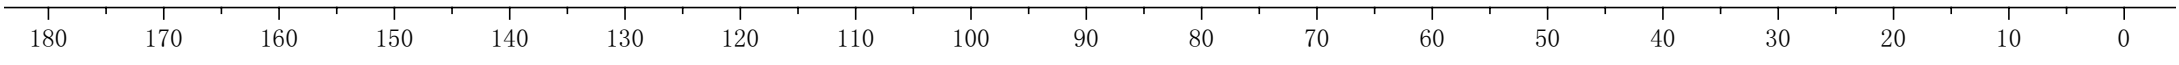

Supplement: c8cc04733b1.pdf [file c8cc04733b1.pdf]
